# Supplementary material for: Oxalamide ligands with additional coordinating groups for Cu-catalyzed arylation of alcohols and phenols
Source: Royal Society of Chemistry journal article supplement (doi:10.1039/d4cc02331e), 2024-01-01

# **Oxalamide ligands with additional coordinating groups for Cu-catalyzed arylation of alcohols and phenols**

Xiantong Yao, Xin Yang, Fanghua Chen, Rui Chen, Maolin Sun, Ruihua Cheng, Yueyue Ma\*, and Jinxing Ye\*.

School of Biomedical and Pharmaceutical Sciences, Guangdong University of Technology, Guangzhou 510006, China

Corresponding Author

Email: mayueyue20121@gdut.edu.cn

Email: jinxingye@gdut.edu.cn

## **INDEX**

|                                                                                               |    |
|-----------------------------------------------------------------------------------------------|----|
| 1. General remarks .....                                                                      | 2  |
| 2. General procedure for the preparation of ligands .....                                     | 2  |
| 3. Optimization studies .....                                                                 | 6  |
| 4. General procedure for the catalytic arylation of alcohols from (hetero)aryl bromides. .... | 6  |
| 5. General procedure for the catalytic arylation of phenols from (hetero)aryl bromides. ....  | 15 |
| 6. Reference .....                                                                            | 22 |
| 7. NMR spectra for ligands and products .....                                                 | 22 |

---

## 1. General remarks

$^1\text{H}$  NMR spectra and  $^{13}\text{C}$  NMR spectra were recorded on Bruker AVANCE III HD 400 (400 and 101 MHz) spectrometer or JNM-ECZ500R/S1 (500 and 126 MHz) spectrometer. Chemical shifts ( $\delta$ ) for protons are reported in parts per million (ppm) downfield from tetramethylsilane and are referenced to residual solvent peak. Chemical shifts ( $\delta$ ) for carbon are reported in parts per million (ppm) downfield from tetramethylsilane and are referenced to the carbon resonances of the solvent. Data are reported as follows: chemical shift, multiplicity (br = broad, s = singlet, d = doublet, dd = doublet of doublets, t = triplet, dt = doublet of triplets, q = quartet, quint = quintet, m = multiplet), coupling constants (J) in Hertz (Hz), integration; High resolution mass spectrometry (ESI) was carried out using a Waters Quatro Macro triple quadrupole mass spectrometer. Mass spectra (EI) were measured on a Waters Micromass GCT spectrometer.

All reactions were set up in a 10 mL Teflon-screw capped test tubes (unless otherwise noted) under an inert nitrogen ( $\text{N}_2$ ) atmosphere. Reagents: All commercial materials were used as received unless otherwise noted.

## 2. General procedure for the preparation of ligands

### 2.1. Procedure for the synthesis of **L1**, **L4-L8**.<sup>[1]</sup>

In an oven-dried round-bottom flask was charged with corresponding aniline or amine (2.0 equiv) in THF (0.3 M) was added  $\text{Et}_3\text{N}$  (2.5 equiv), oxalyl chloride (1.0 equiv) was then added to the solution slowly at 0 °C. After the resulting mixture was stirred at room temperature for 2 h, The mixture was filtered and the solid on filter paper was washed with THF. The filtrate was evaporated and the crude product was purified with silica gel chromatography to afford the corresponding ligand.

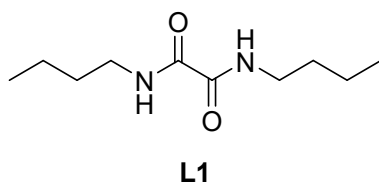

**L1** was prepared from butylamine and oxalyl chloride as a white solid in 60% yield.  $^1\text{H}$  NMR (400 MHz, DMSO)  $\delta$  8.67 (t,  $J = 5.6$  Hz, 2H), 3.12 (dd,  $J = 13.5, 6.8$  Hz, 4H), 1.48 – 1.37 (m, 4H), 1.30 – 1.20 (m, 4H), 0.86 (t,  $J = 7.3$  Hz, 6H).  $^{13}\text{C}$  NMR (101 MHz, DMSO)  $\delta$  160.0, 38.5, 30.9, 19.5, 13.6.

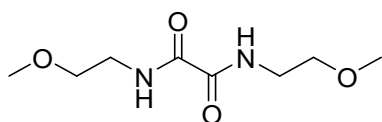

**L4**

**L4** was prepared from 2-methoxyethan-1-amine and oxalyl chloride as a white solid in 79% yield.  $^1\text{H NMR}$  (400 MHz,  $\text{CDCl}_3$ )  $\delta$  7.74 (s, 2H), 3.52 – 3.44 (m, 8H), 3.33 (s, 6H).  $^{13}\text{C NMR}$  (101 MHz,  $\text{CDCl}_3$ )  $\delta$  159.9, 70.7, 58.9, 39.6.

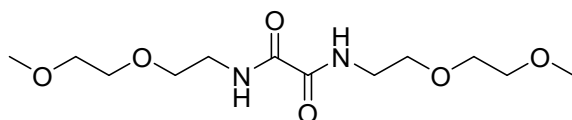

**L5**

**L5** was prepared from 2-(2-methoxyethoxy)ethan-1-amine and oxalyl chloride as a white solid in 77% yield.  $^1\text{H NMR}$  (400 MHz,  $\text{CDCl}_3$ )  $\delta$  7.79 (s, 2H), 3.63 – 3.56 (m, 8H), 3.55 – 3.47 (m, 8H), 3.37 (s, 6H).  $^{13}\text{C NMR}$  (101 MHz,  $\text{CDCl}_3$ )  $\delta$  159.9, 72.0, 70.5, 69.5, 59.2, 39.6. HRMS (ESI)  $m/z$  calcd for  $\text{C}_{12}\text{H}_{24}\text{N}_2\text{NaO}_6$   $[\text{M}+\text{Na}]^+$  315.1532, found 315.1529.

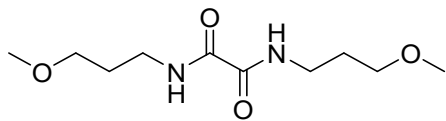

**L6**

**L6** was prepared from 3-methoxypropan-1-amine and oxalyl chloride as a white solid in 80% yield.  $^1\text{H NMR}$  (400 MHz, DMSO)  $\delta$  8.71 (t,  $J = 5.7$  Hz, 2H), 3.31 (dd,  $J = 7.8, 4.7$  Hz, 4H), 3.21 (s, 6H), 3.17 (dd,  $J = 13.5, 6.8$  Hz, 4H), 1.68 (p,  $J = 6.5$  Hz, 4H).  $^{13}\text{C NMR}$  (101 MHz, DMSO)  $\delta$  160.0, 69.8, 58.0, 36.5, 28.8. HRMS (ESI)  $m/z$  calcd for  $\text{C}_{10}\text{H}_{20}\text{N}_2\text{NaO}_4$   $[\text{M}+\text{Na}]^+$  255.1321, found 255.1319.

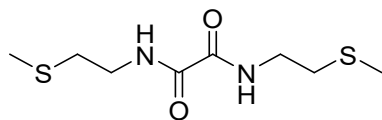

**L7**

**L7** was prepared from 2-(methylthio)ethan-1-amine and oxalyl chloride as a white solid in 82% yield.  $^1\text{H NMR}$  (400 MHz, DMSO)  $\delta$  8.80 (t,  $J = 5.8$  Hz, 2H), 3.34 (q,  $J = 6.5$  Hz, 5H), 2.59 (t,  $J = 7.0$  Hz, 4H), 2.06 (s, 6H).  $^{13}\text{C NMR}$  (101 MHz, DMSO)  $\delta$  159.9, 38.0, 32.2, 14.4. HRMS (ESI)  $m/z$  calcd for  $\text{C}_8\text{H}_{16}\text{N}_2\text{NaO}_2\text{S}_2$   $[\text{M}+\text{Na}]^+$  259.0551, found 259.0543.

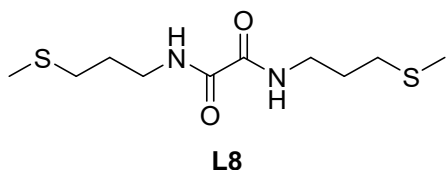

**L8** was prepared from 3-(methylthio)propan-1-amine and oxalyl chloride as a white solid in 81% yield.  $^1\text{H}$  NMR (400 MHz, DMSO)  $\delta$  8.77 (t,  $J = 5.8$  Hz, 2H), 3.20 (dd,  $J = 13.4, 6.7$  Hz, 4H), 2.43 (t,  $J = 7.3$  Hz, 4H), 2.02 (s, 6H), 1.77 – 1.65 (m, 4H).  $^{13}\text{C}$  NMR (101 MHz, DMSO)  $\delta$  160.1, 38.0, 30.6, 28.2, 14.6. HRMS (ESI)  $m/z$  calcd for  $\text{C}_{10}\text{H}_{20}\text{N}_2\text{NaO}_2\text{S}_2$   $[\text{M}+\text{Na}]^+$  287.0864, found 287.0860.

### 2.1. Procedure for the synthesis of **L2** and **L3**.<sup>[2]</sup>

Dissolve diethyl oxalate (7.3 g, 0.05 mol) in 50 mL of ethanol solution in a 250 mL round-bottom flask. Add 1-amino-2-methylpropan-2-ol (8.9 g, 0.1 mol) dropwise in this solution. Stir the mixture under 70 °C for 4 h. The mixture was cooled to room temperature and filtered, the solid on filter paper was washed with ethanol. The solid was dried in vacuo to afford the corresponding oxalic diamide.

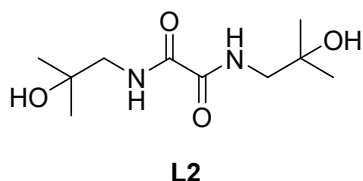

**L2** was prepared from 1-amino-2-methylpropan-2-ol and oxalyl chloride as a white solid in 67% yield.  $^1\text{H}$  NMR (400 MHz, DMSO)  $\delta$  8.27 (t,  $J = 6.2$  Hz, 2H), 4.66 (s, 2H), 3.13 (d,  $J = 6.4$  Hz, 4H), 1.06 (s, 12H).  $^{13}\text{C}$  NMR (101 MHz, DMSO)  $\delta$  159.9, 69.1, 49.9, 27.2. HRMS (ESI)  $m/z$  calcd for  $\text{C}_{10}\text{H}_{20}\text{N}_2\text{NaO}_4$   $[\text{M}+\text{Na}]^+$  255.1321, found 255.1312.

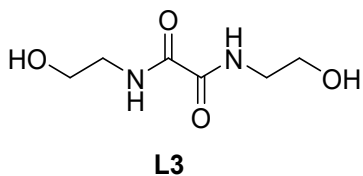

**L3** was prepared from ethanolamine and dimethyl oxalate as a white solid in 57% yield.  $^1\text{H}$  NMR (400 MHz, DMSO)  $\delta$  8.56 (t,  $J = 5.2$  Hz, 2H), 4.74 (s, 2H), 3.44 (t,  $J = 6.1$  Hz, 4H), 3.21 (q,  $J = 6.1$  Hz, 4H).  $^{13}\text{C}$  NMR (101 MHz, DMSO)  $\delta$  160.1, 59.3, 41.7. HRMS (ESI)  $m/z$  calcd for  $\text{C}_6\text{H}_{12}\text{N}_2\text{NaO}_4$   $[\text{M}+\text{Na}]^+$  199.0695, found 199.0691.

### 2.3. Procedure for the synthesis of **L9-L13**.<sup>[1]</sup>

In an oven-dried round-bottom flask was charged with corresponding aniline or amine (2.0



equiv) in THF (0.3 M) was added Et<sub>3</sub>N (2.5 equiv), oxalyl chloride (1.0 equiv) was then added to the solution slowly at 0 °C. After the resulting mixture was stirred at room temperature for 2 h, it was concentrated in vacuo to remove the solvent. Water was added to the residue to dissolve Et<sub>3</sub>N·HCl salt. The slurry was filtered and the solid on filter paper was washed with water and cold diethyl ether. The solid was dried in vacuo to afford the corresponding oxalic diamide.

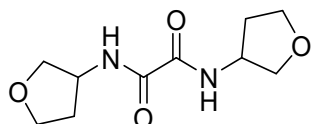

**L9**

**L9** was prepared from tetrahydrofuran-3-amine and oxalyl chloride as a white solid in 85% yield. <sup>1</sup>H NMR (400 MHz, DMSO) δ 8.82 (d, *J* = 7.1 Hz, 2H), 4.27 (dq, *J* = 7.5, 4.9 Hz, 2H), 3.79 (dt, *J* = 8.6, 7.3 Hz, 4H), 3.71 – 3.64 (m, 2H), 3.55 – 3.49 (m, 2H), 2.12 – 2.01 (m, 2H), 1.98 – 1.85 (m, 2H). <sup>13</sup>C NMR (101 MHz, DMSO) δ 160.1, 71.5, 66.5, 49.8, 31.3. HRMS (ESI) *m/z* calcd for C<sub>10</sub>H<sub>16</sub>N<sub>2</sub>NaO<sub>4</sub> [M+Na]<sup>+</sup> 251.1008, found 251.1002.

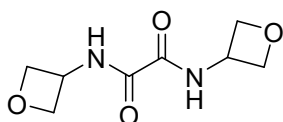

**L10**

**L10** was prepared from 3-oxetanamine and oxalyl chloride as a white solid in 80% yield. <sup>1</sup>H NMR (400 MHz, DMSO) δ 9.50 (d, *J* = 6.8 Hz, 2H), 4.93 – 4.78 (m, 2H), 4.63 (dt, *J* = 24.5, 6.4 Hz, 8H). <sup>13</sup>C NMR (101 MHz, DMSO) δ 159.4, 76.2, 44.1. HRMS (ESI) *m/z* calcd for C<sub>8</sub>H<sub>12</sub>N<sub>2</sub>NaO<sub>4</sub> [M+Na]<sup>+</sup> 223.0695, found 223.0691.

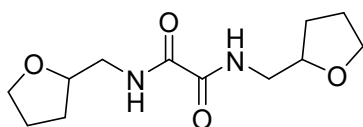

**L11**

**L11** was prepared from (tetrahydrofuran-2-yl)methanamine and oxalyl chloride as a white solid in 80% yield. <sup>1</sup>H NMR (400 MHz, DMSO) δ 8.60 (t, *J* = 6.0 Hz, 2H), 3.98 – 3.88 (m, 2H), 3.79 – 3.70 (m, 2H), 3.60 (dd, *J* = 14.4, 7.4 Hz, 2H), 3.26 – 3.10 (m, 4H), 1.92 – 1.74 (m, 6H), 1.53 (ddd, *J* = 17.0, 11.2, 6.8 Hz, 2H). <sup>13</sup>C NMR (101 MHz, DMSO) δ 160.0, 76.5, 67.1, 43.0, 28.5, 25.0. HRMS (ESI) *m/z* calcd for C<sub>12</sub>H<sub>20</sub>N<sub>2</sub>NaO<sub>4</sub> [M+Na]<sup>+</sup> 279.1321, found 279.1319.

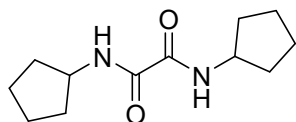

**L12**

**L12** was prepared from cyclopentylamine and oxalyl chloride as a white solid in 82% yield.  $^1\text{H}$  NMR (500 MHz,  $\text{CDCl}_3$ )  $\delta$  7.48 (d,  $J = 7.2$  Hz, 2H), 4.21 – 4.10 (m, 2H), 2.04 – 1.91 (m, 4H), 1.74 – 1.65 (m, 4H), 1.64 – 1.56 (m, 4H), 1.53 – 1.36 (m, 4H).  $^{13}\text{C}$  NMR (126 MHz,  $\text{CDCl}_3$ )  $\delta$  159.5, 51.4, 32.8, 23.8.

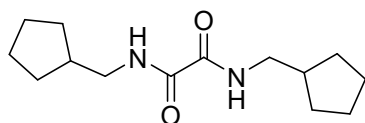

**L13**

**L13** was prepared from cyclopentanemethylamine and oxalyl chloride as a white solid in 75% yield.  $^1\text{H}$  NMR (500 MHz,  $\text{CDCl}_3$ )  $\delta$  7.59 (s, 2H), 3.23 (t,  $J = 6.8$  Hz, 4H), 2.07 (hept,  $J = 7.6$  Hz, 2H), 1.80 – 1.71 (m, 4H), 1.67 – 1.48 (m, 8H), 1.20 (dq,  $J = 11.9, 7.4$  Hz, 4H).  $^{13}\text{C}$  NMR (126 MHz,  $\text{CDCl}_3$ )  $\delta$  160.0, 44.7, 39.5, 30.4, 25.2. HRMS (ESI)  $m/z$  calcd for  $\text{C}_{14}\text{H}_{24}\text{N}_2\text{NaO}_2$   $[\text{M}+\text{Na}]^+$  275.1735, found 275.1739.

### 3. Optimization studies

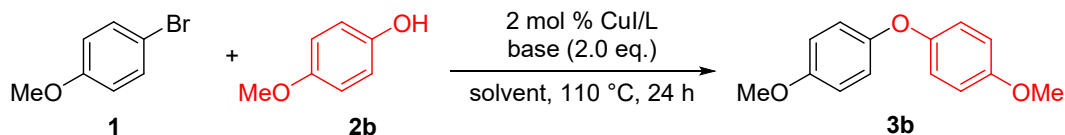

**Table S1. Optimization of the reaction conditions**

| Entry | Ligand | solvent | base                     | Yield of 3b (%) <sup>a,b</sup> |
|-------|--------|---------|--------------------------|--------------------------------|
| 1     | L4     | dioxane | $\text{Cs}_2\text{CO}_3$ | 87                             |
| 2     | L4     | dioxane | $\text{K}_3\text{PO}_4$  | 74                             |
| 3     | L4     | dioxane | $\text{K}_2\text{CO}_3$  | 71                             |
| 4     | L4     | DMSO    | $\text{Cs}_2\text{CO}_3$ | 90                             |
| 5     | L4     | DMF     | $\text{Cs}_2\text{CO}_3$ | 72                             |
| 6     | L4     | DMAc    | $\text{Cs}_2\text{CO}_3$ | 79                             |
| 7     | L4     | MeCN    | $\text{Cs}_2\text{CO}_3$ | 89                             |
| 8     | L1     | DMSO    | $\text{Cs}_2\text{CO}_3$ | 65                             |
| 9     | L5     | DMSO    | $\text{Cs}_2\text{CO}_3$ | 89                             |
| 10    | L6     | DMSO    | $\text{Cs}_2\text{CO}_3$ | 86                             |
| 11    | L7     | DMSO    | $\text{Cs}_2\text{CO}_3$ | 80                             |
| 12    | L8     | DMSO    | $\text{Cs}_2\text{CO}_3$ | 81                             |

<sup>a</sup> Reaction conditions: **1** (2.0 mmol), **2b** (3.0 mmol), 2 mol % CuI, 2 mol % ligand, base (4.0 mmol), solvent (1 mL), 110 °C, 24 h. <sup>b</sup>Isolated yield

### 4. General procedure for the catalytic arylation of alcohols from (hetero)aryl bromides.

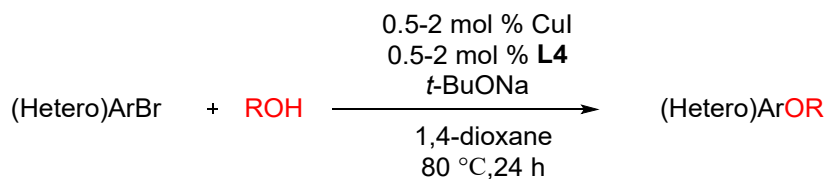

The (hetero)aryl bromides (2.0 mmol), CuI (0.1-0.4 mmol, 1.9-7.6 mg), *t*-BuONa (3.0 mmol, 288.3 mg), ligand **L4**(0.1-0.4 mmol), aliphatic alcohols (4.0 mmol) were placed into a Schlenk tube (10 mL) with a magnetic stir bar. The reaction vessel was evacuated and backfilled with argon three times, then 1,4-dioxane (1.0 mL) were added under a positive argon pressure (Note: for liquid substrates, they were added after the tube was backfilled with argon). The reaction mixture was heated at 80 °C for 24 h under vigorous stirring. The cooled solution was acidified with 1 N HCl (for products that contain a Brønsted-basic functional group, no aqueous HCl was added), then diluted with ethyl acetate and washed with brine. The organic phase was dried over Na<sub>2</sub>SO<sub>4</sub> and concentrated in vacuo. The residue was purified by silica gel flash chromatography to afford the corresponding alkyl aryl ethers.

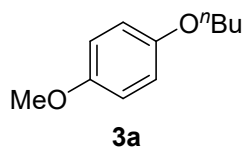

**3a**: Colorless liquid (324 mg, 90%). <sup>1</sup>H NMR (400 MHz, CDCl<sub>3</sub>) δ 6.88 – 6.81 (m, 4H), 3.92 (t, *J* = 6.5 Hz, 2H), 3.77 (s, 3H), 1.76 (dt, *J* = 14.5, 6.6 Hz, 2H), 1.55 – 1.44 (m, 2H), 0.98 (t, *J* = 7.4 Hz, 3H). <sup>13</sup>C NMR (101 MHz, CDCl<sub>3</sub>) δ 153.8, 153.5, 115.6, 114.7, 68.5, 55.8, 31.6, 19.4, 14.0.

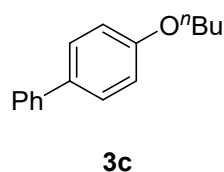

**3c**: White solid (416 mg, 92%). <sup>1</sup>H NMR (400 MHz, CDCl<sub>3</sub>) δ 7.60 – 7.51 (m, 4H), 7.43 (dd, *J* = 10.5, 4.8 Hz, 2H), 7.31 (t, *J* = 7.4 Hz, 1H), 7.02 – 6.96 (m, 2H), 4.02 (t, *J* = 6.5 Hz, 2H), 1.82 (dt, *J* = 14.5, 6.6 Hz, 2H), 1.59 – 1.48 (m, 2H), 1.01 (t, *J* = 7.4 Hz, 3H). <sup>13</sup>C NMR (101 MHz, CDCl<sub>3</sub>) δ 158.9, 141.0, 133.7, 128.8, 128.2, 126.9, 126.7, 114.9, 67.9, 31.5, 19.4, 14.0.

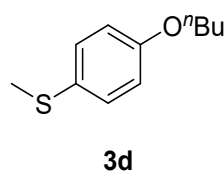

**3d**: Colorless liquid (344 mg, 88%). <sup>1</sup>H NMR (400 MHz, CDCl<sub>3</sub>) δ 7.21 – 7.15 (m, 2H), 6.80

– 6.72 (m, 2H), 3.85 (t,  $J = 6.5$  Hz, 2H), 2.36 (s, 3H), 1.72 – 1.63 (m, 2H), 1.46 – 1.35 (m, 2H), 0.89 (t,  $J = 7.4$  Hz, 3H).  $^{13}\text{C}$  NMR (101 MHz,  $\text{CDCl}_3$ )  $\delta$  157.9, 130.3, 128.5, 115.3, 67.9, 31.4, 19.3, 18.2, 13.9.

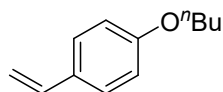

**3e**

**3e:** Yellow liquid (228 mg, 65%).  $^1\text{H}$  NMR (400 MHz,  $\text{CDCl}_3$ )  $\delta$  7.37 – 7.32 (m, 2H), 6.89 – 6.84 (m, 2H), 6.67 (dd,  $J = 17.6, 10.9$  Hz, 1H), 5.61 (dd,  $J = 17.6, 0.9$  Hz, 1H), 5.13 (dd,  $J = 10.9, 0.8$  Hz, 1H), 3.97 (t,  $J = 6.5$  Hz, 2H), 1.82 – 1.74 (m, 2H), 1.56 – 1.45 (m, 2H), 0.99 (t,  $J = 7.4$  Hz, 3H).  $^{13}\text{C}$  NMR (101 MHz,  $\text{CDCl}_3$ )  $\delta$  159.1, 136.4, 130.4, 127.5, 114.6, 111.5, 67.9, 31.5, 19.4, 14.0.

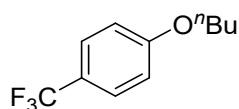

**3f**

**3f:** Colorless liquid (314 mg, 72%).  $^1\text{H}$  NMR (400 MHz,  $\text{CDCl}_3$ )  $\delta$  7.53 (d,  $J = 8.5$  Hz, 2H), 6.95 (d,  $J = 8.6$  Hz, 2H), 4.00 (t,  $J = 6.5$  Hz, 2H), 1.83 – 1.75 (m, 2H), 1.55 – 1.45 (m, 2H), 0.99 (t,  $J = 7.4$  Hz, 3H).  $^{19}\text{F}$  NMR (376 MHz,  $\text{CDCl}_3$ )  $\delta$  -61.45.  $^{13}\text{C}$  NMR (101 MHz,  $\text{CDCl}_3$ )  $\delta$  161.77, 127.0 (q,  $J = 3.8$  Hz), 124.7 (q,  $J = 270.9$  Hz), 122.7 (q,  $J = 32.7$  Hz), 114.6, 68.1, 31.3, 19.3, 13.9.

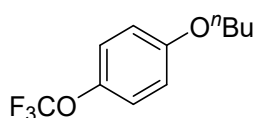

**3g**

**3g:** Colorless liquid (309 mg, 66%).  $^1\text{H}$  NMR (400 MHz,  $\text{CDCl}_3$ )  $\delta$  7.13 (d,  $J = 9.1$  Hz, 2H), 6.90 – 6.84 (m, 2H), 3.94 (t,  $J = 6.5$  Hz, 2H), 1.81 – 1.72 (m, 2H), 1.55 – 1.44 (m, 2H), 0.98 (t,  $J = 7.4$  Hz, 3H).  $^{19}\text{F}$  NMR (376 MHz,  $\text{CDCl}_3$ )  $\delta$  -58.44.  $^{13}\text{C}$  NMR (101 MHz,  $\text{CDCl}_3$ )  $\delta$  157.8, 142.7 (q,  $J = 1.7$  Hz), 122.5, 120.7 (q,  $J = 255.9$  Hz), 115.3, 68.3, 31.4, 19.3, 13.9. HRMS (ESI)  $m/z$  calcd for  $\text{C}_{11}\text{H}_{13}\text{F}_3\text{O}_2$   $[\text{M}]^+$  234.0868, found 234.0864.

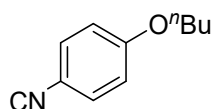

**3h**

**3h:** Colorless liquid (333 mg, 95%).  $^1\text{H}$  NMR (400 MHz, DMSO)  $\delta$  7.73 (d,  $J = 8.9$  Hz, 2H), 7.08 (d,  $J = 8.9$  Hz, 2H), 4.04 (t,  $J = 6.5$  Hz, 2H), 1.69 (tt,  $J = 12.6, 6.5$  Hz, 2H), 1.48 – 1.35

(m, 2H), 0.91 (t,  $J = 7.4$  Hz, 3H).  $^{13}\text{C}$  NMR (101 MHz, DMSO)  $\delta$  162.2, 134.1, 119.2, 115.5, 102.6, 67.7, 30.5, 18.6, 13.6.

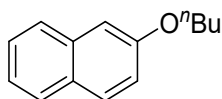

**3i**

**3i:** Yellowwish semisolid (324 mg, 81%).  $^1\text{H}$  NMR (400 MHz,  $\text{CDCl}_3$ )  $\delta$  7.82 – 7.71 (m, 3H), 7.50 – 7.42 (m, 1H), 7.39 – 7.32 (m, 1H), 7.21 – 7.14 (m, 2H), 4.10 (t,  $J = 6.5$  Hz, 2H), 1.92 – 1.81 (m, 2H), 1.57 (h,  $J = 7.4$  Hz, 2H), 1.04 (t,  $J = 7.4$  Hz, 3H).  $^{13}\text{C}$  NMR (101 MHz,  $\text{CDCl}_3$ )  $\delta$  157.3, 134.8, 129.4, 129.0, 127.8, 126.8, 126.4, 123.6, 119.2, 106.7, 67.8, 31.5, 19.5, 14.0.

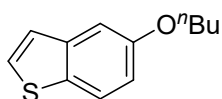

**3j**

**3j:** Colorless liquid (388 mg, 94%).  $^1\text{H}$  NMR (400 MHz,  $\text{CDCl}_3$ )  $\delta$  7.70 (d,  $J = 8.8$  Hz, 1H), 7.39 (d,  $J = 5.4$  Hz, 1H), 7.25 (d,  $J = 2.4$  Hz, 1H), 7.21 (d,  $J = 5.3$  Hz, 1H), 6.98 (dd,  $J = 8.8$ , 2.4 Hz, 1H), 3.99 (t,  $J = 6.5$  Hz, 2H), 1.83 – 1.74 (m, 2H), 1.57 – 1.45 (m, 2H), 0.98 (t,  $J = 7.4$  Hz, 3H).  $^{13}\text{C}$  NMR (101 MHz,  $\text{CDCl}_3$ )  $\delta$  157.0, 140.1, 127.5, 123.7, 123.1, 115.2, 106.6, 68.2, 31.5, 19.4, 14.0.

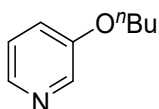

**3k**

**3k:** Colorless liquid (252 mg, 83%).  $^1\text{H}$  NMR (400 MHz,  $\text{CDCl}_3$ )  $\delta$  8.31 – 8.24 (m, 1H), 8.20 – 8.12 (m, 1H), 7.19 – 7.12 (m, 2H), 3.97 (t,  $J = 6.5$  Hz, 2H), 1.80 – 1.70 (m, 2H), 1.53 – 1.42 (m, 2H), 0.95 (t,  $J = 7.4$  Hz, 3H).  $^{13}\text{C}$  NMR (101 MHz,  $\text{CDCl}_3$ )  $\delta$  155.4, 141.9, 138.1, 123.9, 121.1, 68.1, 31.2, 19.2, 13.9.

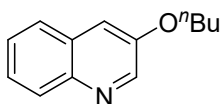

**3l**

**3l:** Colorless liquid (340 mg, 85%).  $^1\text{H}$  NMR (400 MHz,  $\text{CDCl}_3$ )  $\delta$  8.66 (d,  $J = 2.9$  Hz, 1H), 8.03 (d,  $J = 8.2$  Hz, 1H), 7.69 (dd,  $J = 8.0$ , 1.1 Hz, 1H), 7.57 – 7.44 (m, 2H), 7.34 (d,  $J = 2.8$  Hz, 1H), 4.07 (t,  $J = 6.5$  Hz, 2H), 1.84 (m, 2H), 1.59 – 1.49 (m, 2H), 1.00 (t,  $J = 7.4$  Hz, 3H).  $^{13}\text{C}$  NMR (101 MHz,  $\text{CDCl}_3$ )  $\delta$  152.7, 145.0, 143.5, 129.2, 129.0, 127.1, 126.7, 126.6, 113.0, 68.1, 31.2, 19.3, 13.9.

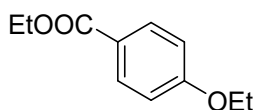

**3m**

**3m:** Colorless liquid (212 mg, 70%).  $^1\text{H}$  NMR (400 MHz,  $\text{CDCl}_3$ )  $\delta$  8.01 – 7.95 (m, 2H), 6.92 – 6.86 (m, 2H), 4.34 (q,  $J = 7.1$  Hz, 2H), 4.07 (q,  $J = 7.0$  Hz, 2H), 1.43 (t,  $J = 7.0$  Hz, 3H), 1.37 (t,  $J = 7.1$  Hz, 3H).  $^{13}\text{C}$  NMR (101 MHz,  $\text{CDCl}_3$ )  $\delta$  166.6, 162.8, 131.6, 122.9, 114.1, 63.8, 60.7, 14.8, 14.5.

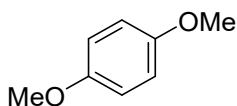

**3n**

**3n:** white solid (221 mg, 80%)  $^1\text{H}$  NMR (400 MHz,  $\text{CDCl}_3$ )  $\delta$  6.85 (s, 4H), 3.78 (s, 6H).  $^{13}\text{C}$  NMR (101 MHz,  $\text{CDCl}_3$ )  $\delta$  153.9, 114.8, 55.9.

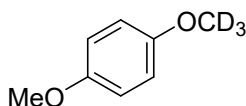

**3o**

**3o:** White solid (220 mg, 78%).  $^1\text{H}$  NMR (400 MHz,  $\text{CDCl}_3$ )  $\delta$  6.84 (s, 4H), 3.77 (s, 3H).  $^{13}\text{C}$  NMR (101 MHz,  $\text{CDCl}_3$ )  $\delta$  153.9, 114.8, 114.8, 55.9.

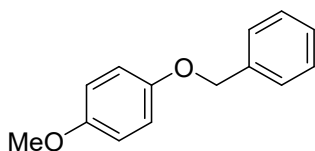

**3p**

**3p:** White solid (410 mg, 96%).  $^1\text{H}$  NMR (400 MHz,  $\text{CDCl}_3$ )  $\delta$  7.45 – 7.34 (m, 4H), 7.34 – 7.27 (m, 1H), 6.93 – 6.88 (m, 2H), 6.85 – 6.80 (m, 2H), 5.00 (s, 2H), 3.75 (s, 3H).  $^{13}\text{C}$  NMR (101 MHz,  $\text{CDCl}_3$ )  $\delta$  154.1, 153.1, 137.5, 128.7, 128.0, 127.6, 116.0, 114.8, 70.9, 55.9.

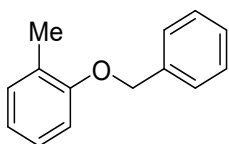

**3q**

**3q:** Colorless liquid (286 mg, 72%).  $^1\text{H}$  NMR (400 MHz,  $\text{CDCl}_3$ )  $\delta$  7.49 (d,  $J = 7.4$  Hz, 2H), 7.42 (t,  $J = 7.4$  Hz, 2H), 7.35 (t,  $J = 7.2$  Hz, 1H), 7.23 – 7.15 (m, 2H), 6.95 – 6.89 (m, 2H), 5.12 (s, 2H), 2.33 (s, 3H).  $^{13}\text{C}$  NMR (101 MHz,  $\text{CDCl}_3$ )  $\delta$  157.0, 137.7, 130.9, 128.6, 127.9, 127.2, 126.9, 120.7, 111.6, 69.9, 16.5.

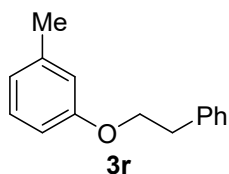

**3r:** Colorless liquid (360 mg, 85%).  $^1\text{H NMR}$  (400 MHz,  $\text{CDCl}_3$ )  $\delta$  7.41 – 7.26 (m, 5H), 7.21 (t,  $J = 7.7$  Hz, 1H), 6.86 – 6.71 (m, 3H), 4.21 (t,  $J = 7.2$  Hz, 2H), 3.15 (t,  $J = 7.1$  Hz, 2H), 2.38 (s, 3H).  $^{13}\text{C NMR}$  (101 MHz,  $\text{CDCl}_3$ )  $\delta$  158.9, 139.6, 138.5, 129.3, 129.1, 128.6, 126.6, 121.7, 115.6, 111.5, 68.6, 36.0, 21.6.

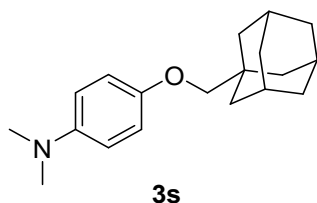

**3s:** White solid (467 mg, 82%).  $^1\text{H NMR}$  (400 MHz,  $\text{CDCl}_3$ )  $\delta$  6.88 – 6.82 (m, 2H), 6.78 – 6.73 (m, 2H), 3.46 (s, 2H), 2.86 (s, 6H), 2.02 (s, 3H), 1.79 – 1.66 (m, 12H).  $^{13}\text{C NMR}$  (101 MHz,  $\text{CDCl}_3$ )  $\delta$  152.5, 145.6, 115.5, 115.2, 79.3, 42.1, 39.7, 37.3, 34.0, 28.4. HRMS (ESI)  $m/z$  calcd for  $\text{C}_{19}\text{H}_{28}\text{NO}$   $[\text{M}+\text{H}]^+$  286.2171, found 286.2174.

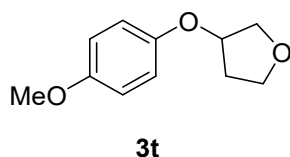

**3t:** Colorless liquid (279 mg, 72%).  $^1\text{H NMR}$  (400 MHz,  $\text{CDCl}_3$ )  $\delta$  6.88 – 6.76 (m, 4H), 4.84 (dq,  $J = 6.4, 3.2$  Hz, 1H), 4.02 – 3.94 (m, 3H), 3.92 – 3.85 (m, 1H), 2.20 – 2.10 (m, 2H).  $^{13}\text{C NMR}$  (101 MHz,  $\text{CDCl}_3$ )  $\delta$  154.1, 151.5, 116.6, 114.8, 78.0, 73.2, 67.3, 55.8, 33.0.

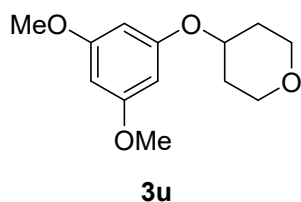

**3u:** Colorless liquid (378 mg, 79%).  $^1\text{H NMR}$  (400 MHz,  $\text{CDCl}_3$ )  $\delta$  6.09 (dt,  $J = 4.1, 2.1$  Hz, 3H), 4.43 (tt,  $J = 7.8, 3.8$  Hz, 1H), 4.01 – 3.93 (m, 2H), 3.76 (s, 6H), 3.56 (ddd,  $J = 11.6, 8.4, 3.2$  Hz, 2H), 2.09 – 1.97 (m, 2H), 1.84 – 1.71 (m, 2H).  $^{13}\text{C NMR}$  (101 MHz,  $\text{CDCl}_3$ )  $\delta$  161.7, 159.1, 94.9, 93.2, 71.7, 65.3, 55.4, 31.9. HRMS (ESI)  $m/z$  calcd for  $\text{C}_{13}\text{H}_{18}\text{O}_4$   $[\text{M}]^+$  238.1205, found 238.1207.

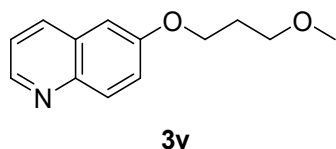

**3v**: Colorless liquid (345 mg, 79%).  $^1\text{H}$  NMR (400 MHz,  $\text{CDCl}_3$ )  $\delta$  8.73 (dd,  $J = 4.2, 1.6$  Hz, 1H), 7.99 (dd,  $J = 13.6, 5.1$  Hz, 2H), 7.33 (ddd,  $J = 15.6, 8.7, 3.5$  Hz, 2H), 7.06 (d,  $J = 2.7$  Hz, 1H), 4.15 (t,  $J = 6.3$  Hz, 2H), 3.58 (t,  $J = 6.1$  Hz, 2H), 3.35 (s, 3H), 2.10 (p,  $J = 6.2$  Hz, 2H).  $^{13}\text{C}$  NMR (101 MHz,  $\text{CDCl}_3$ )  $\delta$  157.2, 148.0, 144.4, 134.9, 130.8, 129.4, 122.6, 121.4, 106.0, 69.2, 65.2, 58.8, 29.6. HRMS (ESI)  $m/z$  calcd for  $\text{C}_{13}\text{H}_{16}\text{NO}_2$   $[\text{M}+\text{H}]^+$  218.1181, found 218.1187.

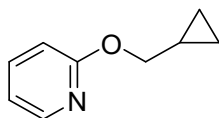

**3w**

**3w**: Colorless liquid (197 mg, 66%).  $^1\text{H}$  NMR (400 MHz,  $\text{CDCl}_3$ )  $\delta$  8.11 (dd,  $J = 5.0, 1.8$  Hz, 1H), 7.59 – 7.50 (m, 1H), 6.82 (dd,  $J = 6.6, 5.5$  Hz, 1H), 6.75 (d,  $J = 8.4$  Hz, 1H), 4.11 (d,  $J = 7.1$  Hz, 2H), 1.28 – 1.20 (m, 1H), 0.63 – 0.57 (m, 2H), 0.34 (q,  $J = 4.7$  Hz, 2H).  $^{13}\text{C}$  NMR (101 MHz,  $\text{CDCl}_3$ )  $\delta$  164.1, 146.9, 138.6, 116.6, 111.3, 70.8, 10.2, 3.3.

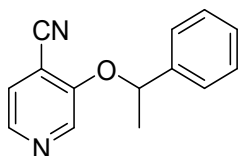

**3x**

**3x**: Yellow liquid (372 mg, 83%).  $^1\text{H}$  NMR (400 MHz,  $\text{CDCl}_3$ )  $\delta$  8.32 (s, 1H), 8.25 (d,  $J = 4.8$  Hz, 1H), 7.44 – 7.34 (m, 5H), 7.32 – 7.26 (m, 1H), 5.54 (q,  $J = 6.4$  Hz, 1H), 1.75 (d,  $J = 6.4$  Hz, 3H).  $^{13}\text{C}$  NMR (101 MHz,  $\text{CDCl}_3$ )  $\delta$  154.2, 142.1, 140.9, 137.8, 129.2, 128.5, 126.1, 125.6, 114.3, 110.2, 78.7, 24.5. HRMS (ESI)  $m/z$  calcd for  $\text{C}_{14}\text{H}_{13}\text{N}_2\text{O}$   $[\text{M}+\text{H}]^+$  225.1028, found 225.1031.

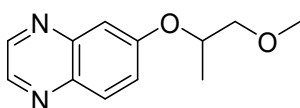

**3y**

**3w**: Yellow liquid (364 mg, 83%).  $^1\text{H}$  NMR (400 MHz,  $\text{CDCl}_3$ )  $\delta$  8.72 (d,  $J = 1.9$  Hz, 1H), 8.65 (d,  $J = 1.9$  Hz, 1H), 7.95 (d,  $J = 9.1$  Hz, 1H), 7.43 – 7.38 (m, 2H), 4.75 (pd,  $J = 6.1, 4.4$  Hz, 1H), 3.64 (dd,  $J = 10.3, 5.9$  Hz, 1H), 3.55 (dd,  $J = 10.3, 4.1$  Hz, 1H), 3.40 (s, 3H), 1.39 (d,  $J = 6.3$  Hz, 3H).  $^{13}\text{C}$  NMR (101 MHz,  $\text{CDCl}_3$ )  $\delta$  159.1, 145.0, 144.7, 142.50, 139.2, 130.6, 124.5, 108.6, 75.6, 73.5, 59.5, 16.4. HRMS (ESI)  $m/z$  calcd for  $\text{C}_{12}\text{H}_{15}\text{N}_2\text{O}_2$   $[\text{M}+\text{H}]^+$  219.1134, found 219.1131.



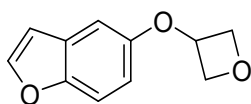

**3z**

**3z:** Yellow liquid (324 mg, 85%).  $^1\text{H NMR}$  (400 MHz,  $\text{CDCl}_3$ )  $\delta$  7.60 (d,  $J = 2.2$  Hz, 1H), 7.40 (d,  $J = 8.8$  Hz, 1H), 6.79 (dd,  $J = 8.8, 2.6$  Hz, 1H), 6.76 (d,  $J = 2.4$  Hz, 1H), 6.69 (dd,  $J = 2.1, 0.9$  Hz, 1H), 5.27 – 5.19 (m, 1H), 4.99 (dd,  $J = 7.4, 6.5$  Hz, 2H), 4.83 – 4.77 (m, 2H).  $^{13}\text{C NMR}$  (101 MHz,  $\text{CDCl}_3$ )  $\delta$  153.0, 150.5, 146.2, 128.2, 113.5, 112.4, 106.7, 104.6, 78.3, 70.8. HRMS (ESI)  $m/z$  calcd for  $\text{C}_{11}\text{H}_{10}\text{O}_3$   $[\text{M}]^+$  190.0630, found 190.0635.

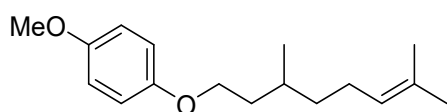

**3bb**

**3bb:** Colorless liquid (456 mg, 87%).  $^1\text{H NMR}$  (400 MHz,  $\text{CDCl}_3$ )  $\delta$  6.84 (m, 4H), 5.15 – 5.08 (m, 1H), 4.00 – 3.89 (m, 2H), 3.77 (s, 3H), 2.12 – 1.92 (m, 2H), 1.87 – 1.77 (m, 1H), 1.69 (d,  $J = 0.6$  Hz, 3H), 1.61 (s, 3H), 1.60 – 1.52 (m, 1H), 1.45 – 1.35 (m, 1H), 1.29 – 1.16 (m, 2H), 0.95 (d,  $J = 6.6$  Hz, 3H).  $^{13}\text{C NMR}$  (101 MHz,  $\text{CDCl}_3$ )  $\delta$  153.8, 153.4, 131.4, 124.8, 115.6, 114.7, 67.1, 55.8, 37.3, 36.4, 29.7, 25.9, 25.6, 19.7, 17.8. HRMS (ESI)  $m/z$  calcd for  $\text{C}_{17}\text{H}_{26}\text{O}_2$   $[\text{M}]^+$  262.1933, found 262.1931.

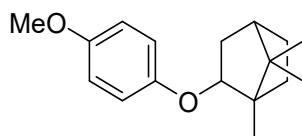

**3bc**

**3bc:** Colorless liquid (433 mg, 83%).  $^1\text{H NMR}$  (400 MHz,  $\text{CDCl}_3$ )  $\delta$  6.84 – 6.75 (m, 4H), 4.25 (ddd,  $J = 9.2, 3.1, 1.5$  Hz, 1H), 3.76 (s, 3H), 2.32 (ddd,  $J = 13.4, 8.6, 4.0$  Hz, 1H), 2.22 (dt,  $J = 11.7, 7.7$  Hz, 1H), 1.81 – 1.70 (m, 2H), 1.37 – 1.28 (m, 2H), 1.12 (dd,  $J = 13.3, 3.3$  Hz, 1H), 0.93 (s, 3H), 0.92 (s, 3H), 0.91 (s, 3H).  $^{13}\text{C NMR}$  (101 MHz,  $\text{CDCl}_3$ )  $\delta$  153.6, 153.6, 116.5, 114.7, 83.6, 55.9, 49.6, 47.7, 45.3, 37.0, 29.9, 28.1, 26.9, 19.9, 19.1, 13.9.

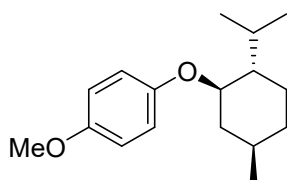

**3bd**

**3bd:** Colorless liquid (383 mg, 73%).  $^1\text{H NMR}$  (400 MHz,  $\text{CDCl}_3$ )  $\delta$  6.89 – 6.78 (m, 4H), 3.88 (td,  $J = 10.5, 4.1$  Hz, 1H), 3.77 (s, 3H), 2.27 (dtd,  $J = 13.9, 7.0, 2.6$  Hz, 1H), 2.11 (dd,  $J = 12.4, 3.9$  Hz, 1H), 1.70 (dt,  $J = 4.8, 3.1$  Hz, 2H), 1.53 – 1.40 (m, 2H), 1.14 – 0.96 (m, 3H), 0.94 (d,  $J$

= 7.0 Hz, 3H), 0.91 (d,  $J = 6.5$  Hz, 3H), 0.79 (d,  $J = 7.0$  Hz, 3H).  $^{13}\text{C}$  NMR (101 MHz,  $\text{CDCl}_3$ )  $\delta$  153.9, 152.6, 117.6, 114.8, 79.0, 55.9, 48.3, 40.6, 34.7, 31.6, 26.1, 23.7, 22.3, 21.0, 16.6.

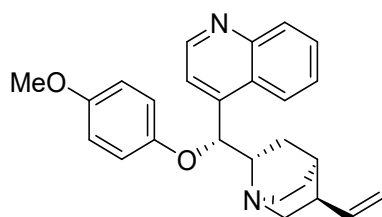

**3be**

**3be:** White solid (403 mg, 50%).  $^1\text{H}$  NMR (400 MHz,  $\text{CDCl}_3$ )  $\delta$  8.81 (d,  $J = 4.5$  Hz, 1H), 8.21 – 8.14 (m, 2H), 7.74 (ddd,  $J = 8.4, 6.9, 1.2$  Hz, 1H), 7.63 (ddd,  $J = 8.2, 6.9, 1.2$  Hz, 1H), 7.46 (d,  $J = 4.5$  Hz, 1H), 6.72 – 6.65 (m, 4H), 5.98 (d,  $J = 2.3$  Hz, 1H), 5.76 – 5.66 (m, 1H), 4.98 – 4.86 (m, 2H), 3.64 (s, 3H), 3.44 – 3.33 (m, 1H), 3.21 (t,  $J = 8.1$  Hz, 1H), 3.15 – 3.09 (m, 1H), 2.76 – 2.63 (m, 2H), 2.34 – 2.24 (m, 1H), 2.05 – 1.98 (m, 1H), 1.94 – 1.83 (m, 2H), 1.62 – 1.51 (m, 2H).  $^{13}\text{C}$  NMR (101 MHz,  $\text{CDCl}_3$ )  $\delta$  154.2, 151.2, 150.2, 145.8, 141.7, 130.7, 129.3, 127.2, 125.5, 122.9, 118.4, 116.4, 114.8, 114.5, 79.4, 60.7, 57.2, 55.6, 43.4, 39.9, 28.1, 27.7, 21.3. HRMS (ESI)  $m/z$  calcd for  $\text{C}_{26}\text{H}_{29}\text{N}_2\text{O}_2$   $[\text{M}+\text{H}]^+$  401.2229, found 401.2231.

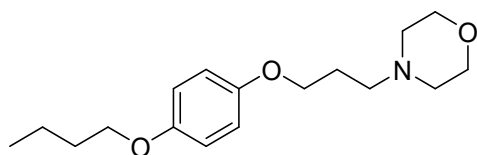

**3bh**

**3bh:** Pale yellow oil (5.47g, 93%),  $^1\text{H}$  NMR (400 MHz,  $\text{CDCl}_3$ )  $\delta$  6.81 (s, 4H), 3.96 (t,  $J = 6.3$  Hz, 2H), 3.90 (t,  $J = 6.5$  Hz, 2H), 3.73 – 3.69 (m, 4H), 2.53 – 2.48 (m, 2H), 2.48 – 2.41 (m, 4H), 1.97 – 1.89 (m, 2H), 1.77 – 1.69 (m, 2H), 1.53 – 1.41 (m, 2H), 0.96 (t,  $J = 7.4$  Hz, 3H).  $^{13}\text{C}$  NMR (101 MHz,  $\text{CDCl}_3$ )  $\delta$  153.4, 153.1, 115.5, 115.5, 68.4, 67.1, 66.9, 55.7, 53.9, 31.6, 26.7, 19.4, 14.0.

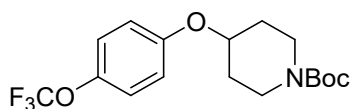

**3bi**

**3bi:** Colorless liquid (617 mg, 85%).  $^1\text{H}$  NMR (400 MHz,  $\text{CDCl}_3$ )  $\delta$  7.13 (d,  $J = 8.4$  Hz, 2H), 6.91 – 6.86 (m, 2H), 4.43 (tt,  $J = 7.1, 3.5$  Hz, 1H), 3.76 – 3.63 (m, 2H), 3.34 (ddd,  $J = 13.4, 7.7, 3.8$  Hz, 2H), 1.90 (ddd,  $J = 11.0, 7.1, 3.3$  Hz, 2H), 1.79 – 1.69 (m, 2H), 1.47 (s, 9H).  $^{19}\text{F}$  NMR (376 MHz,  $\text{CDCl}_3$ )  $\delta$  -58.4.  $^{13}\text{C}$  NMR (101 MHz,  $\text{CDCl}_3$ )  $\delta$  155.8, 155.0, 143.0 (q,  $J = 1.8$  Hz), 122.6, 120.7 (q,  $J = 256.1$  Hz), 117.0, 79.9, 72.9, 40.7, 30.5, 28.6.

## 5. General procedure for the catalytic arylation of phenols.

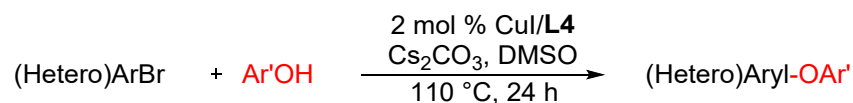

The (hetero)aryl bromides (2.0 mmol), CuI (0.04 mmol, 7.6 mg), Cs<sub>2</sub>CO<sub>3</sub>(4.0 mmol, 1303.3 mg), ligand **L4** (0.04 mmol, 8.2 mg), were placed into a Schlenk tube (10 mL) with a magnetic stir bar. The reaction vessel was evacuated and backfilled with argon three times, then DMSO (1 mL) were added under a positive argon pressure (Note: for liquid substrates, they were added after the tube was backfilled with argon). The reaction mixture was stirred at room temperature for 10 min, phenols (3.0 mmol) was added, and the reaction mixture was heated at 110 °C for 24 h under vigorous stirring. The cooled solution was diluted with ethyl acetate and brine. The organic phase was dried over Na<sub>2</sub>SO<sub>4</sub> and concentrated in vacuo. The residue was purified by silica gel flash chromatography to afford the corresponding biaryl ethers.

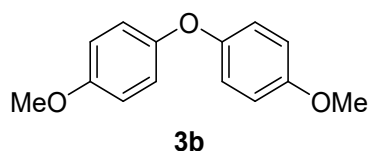

**3b**: White solid (414 mg, 90%). <sup>1</sup>H NMR (400 MHz, CDCl<sub>3</sub>) δ 6.96 – 6.89 (m, 4H), 6.89 – 6.82 (m, 4H), 3.79 (s, 6H). <sup>13</sup>C NMR (101 MHz, CDCl<sub>3</sub>) δ 155.5, 151.7, 119.7, 114.9, 55.8.

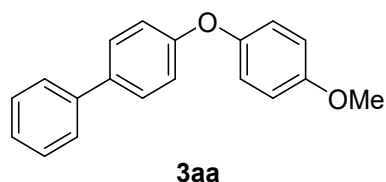

**3aa**: White solid (513 mg, 93%). <sup>1</sup>H NMR (400 MHz, CDCl<sub>3</sub>) δ 7.59 – 7.52 (m, 4H), 7.44 (t, *J* = 7.7 Hz, 2H), 7.33 (t, *J* = 7.3 Hz, 1H), 7.07 – 7.00 (m, 4H), 6.96 – 6.89 (m, 2H), 3.83 (s, 3H). <sup>13</sup>C NMR (101 MHz, CDCl<sub>3</sub>) δ 158.3, 156.1, 150.2, 140.8, 135.7, 128.9, 128.4, 127.1, 127.0, 121.1, 117.9, 115.0, 55.8.

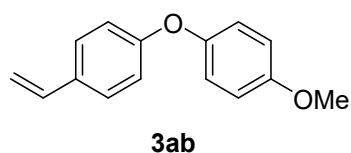

**3ab**: White solid (434 mg, 94%), <sup>1</sup>H NMR (400 MHz, CDCl<sub>3</sub>) δ 7.36 (d, *J* = 8.7 Hz, 2H), 7.04 – 6.96 (m, 2H), 6.94 – 6.86 (m, 4H), 6.69 (dd, *J* = 17.6, 10.9 Hz, 1H), 5.65 (dd, *J* = 17.6, 0.6 Hz, 1H), 5.18 (d, *J* = 10.9 Hz, 1H), 3.82 (s, 3H). <sup>13</sup>C NMR (101 MHz, CDCl<sub>3</sub>) δ 158.4, 156.1, 150.1, 136.2, 132.2, 127.6, 121.0, 117.7, 115.0, 112.6, 55.8.

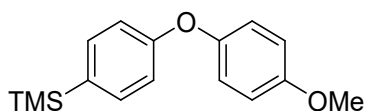

**3ac**

**3ac:** Colorless liquid (520 mg, 95%).  $^1\text{H}$  NMR (400 MHz,  $\text{CDCl}_3$ )  $\delta$  7.49 – 7.43 (m, 2H), 7.03 – 6.99 (m, 2H), 6.96 – 6.93 (m, 2H), 6.92 – 6.89 (m, 2H), 3.82 (s, 3H), 0.27 (s, 9H).  $^{13}\text{C}$  NMR (101 MHz,  $\text{CDCl}_3$ )  $\delta$  159.5, 156.2, 149.9, 134.9, 133.6, 121.2, 116.9, 115.0, 55.8, -0.8. HRMS (ESI)  $m/z$  calcd for  $\text{C}_{16}\text{H}_{20}\text{O}_2\text{Si}$   $[\text{M}]^+$  272.1233, found 272.1232.

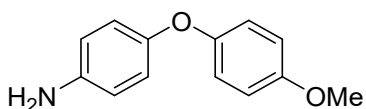

**3ad**

**3ad:** Brown yellow solid (194 mg, 45%).  $^1\text{H}$  NMR (400 MHz,  $\text{CDCl}_3$ )  $\delta$  6.95 – 6.88 (m, 2H), 6.87 – 6.78 (m, 4H), 6.69 – 6.61 (m, 2H), 3.78 (s, 3H).  $^{13}\text{C}$  NMR (101 MHz,  $\text{CDCl}_3$ )  $\delta$  155.1, 152.2, 150.1, 142.2, 120.0, 119.2, 116.3, 114.7, 55.8.

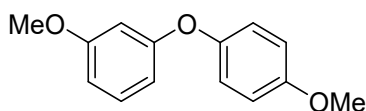

**3ae**

**3ae:** Colorless liquid (395 mg, 86%).  $^1\text{H}$  NMR (400 MHz,  $\text{CDCl}_3$ )  $\delta$  7.22 – 7.16 (m, 1H), 7.03 – 6.96 (m, 2H), 6.92 – 6.86 (m, 2H), 6.63 – 6.57 (m, 1H), 6.56 – 6.48 (m, 2H), 3.81 (s, 3H), 3.77 (s, 3H).  $^{13}\text{C}$  NMR (101 MHz,  $\text{CDCl}_3$ )  $\delta$  161.0, 159.9, 156.1, 150.0, 130.1, 121.1, 115.0, 109.8, 108.1, 103.8, 55.8, 55.5.

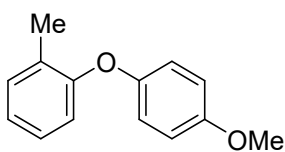

**3af**

**3af:** Colorless liquid (360 mg, 84%).  $^1\text{H}$  NMR (400 MHz,  $\text{CDCl}_3$ )  $\delta$  7.18 – 7.12 (m, 1H), 7.03 (t,  $J = 7.7$  Hz, 1H), 6.92 (t,  $J = 7.4$  Hz, 1H), 6.84 – 6.74 (m, 4H), 6.71 (d,  $J = 8.1$  Hz, 1H), 3.71 (s, 3H), 2.20 (s, 3H).  $^{13}\text{C}$  NMR (101 MHz,  $\text{CDCl}_3$ )  $\delta$  155.9, 155.4, 151.2, 131.4, 129.2, 127.1, 123.2, 119.4, 118.2, 114.9, 55.8, 16.4.

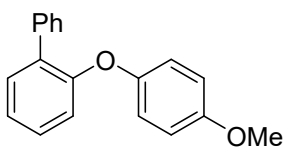

**3ag**

**3ag:** Yellow liquid (375 mg, 68%).  $^1\text{H}$  NMR (400 MHz,  $\text{CDCl}_3$ )  $\delta$  7.59 (dt,  $J = 8.2, 1.8$  Hz,

2H), 7.44 (dd,  $J = 7.6, 1.8$  Hz, 1H), 7.42 – 7.37 (m, 2H), 7.34 – 7.29 (m, 1H), 7.26 (ddd,  $J = 8.1, 7.3, 1.8$  Hz, 1H), 7.16 (td,  $J = 7.5, 1.2$  Hz, 1H), 6.95 – 6.88 (m, 3H), 6.87 – 6.82 (m, 2H), 3.78 (s, 3H).  $^{13}\text{C}$  NMR (101 MHz,  $\text{CDCl}_3$ )  $\delta$  155.6, 155.0, 151.1, 138.1, 132.9, 131.3, 129.4, 128.7, 128.2, 127.3, 123.4, 120.2, 118.7, 114.9, 55.8.

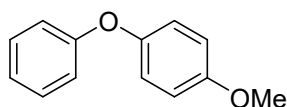

**3ah**

**3ah:** Colorless liquid (360 mg, 90%).  $^1\text{H}$  NMR (400 MHz,  $\text{CDCl}_3$ )  $\delta$  7.34 – 7.27 (m, 2H), 7.08 – 7.03 (m, 1H), 7.02 – 6.93 (m, 4H), 6.92 – 6.87 (m, 2H), 3.81 (s, 3H).  $^{13}\text{C}$  NMR (101 MHz,  $\text{CDCl}_3$ )  $\delta$  158.7, 156.0, 150.3, 129.7, 122.6, 121.0, 117.7, 115.0, 55.8.

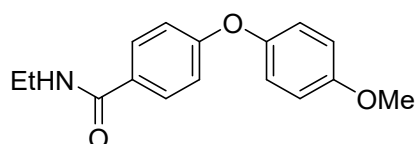

**3ai**

**3ai:** White solid (525 mg, 96%).  $^1\text{H}$  NMR (400 MHz,  $\text{CDCl}_3$ )  $\delta$  7.77 – 7.66 (m, 2H), 7.01 – 6.95 (m, 2H), 6.94 – 6.85 (m, 4H), 6.24 (s, 1H), 3.80 (s, 3H), 3.51 – 3.41 (m, 2H), 1.22 (t,  $J = 7.3$  Hz, 3H).  $^{13}\text{C}$  NMR (101 MHz,  $\text{CDCl}_3$ )  $\delta$  167.0, 161.4, 156.6, 149.1, 128.8, 121.5, 116.8, 115.1, 55.8, 35.0, 15.0. HRMS (ESI)  $m/z$  calcd for  $\text{C}_{16}\text{H}_{18}\text{NO}_3$   $[\text{M}+\text{H}]^+$  272.1287, found 272.1282.

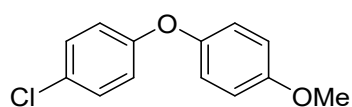

**3aj**

**3aj:** White solid (413 mg, 88%).  $^1\text{H}$  NMR (400 MHz,  $\text{CDCl}_3$ )  $\delta$  7.24 – 7.19 (m, 2H), 6.97 – 6.91 (m, 2H), 6.89 – 6.82 (m, 4H), 3.78 (s, 3H).  $^{13}\text{C}$  NMR (101 MHz,  $\text{CDCl}_3$ )  $\delta$  157.4, 156.3, 149.9, 129.7, 127.5, 121.0, 118.9, 115.1, 55.8.

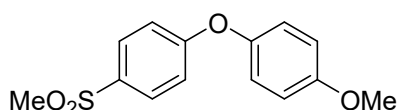

**3ak**

**3ak:** White solid (509 mg, 91%),  $^1\text{H}$  NMR (400 MHz,  $\text{CDCl}_3$ )  $\delta$  7.87 – 7.81 (m, 2H), 7.04 – 6.98 (m, 4H), 6.96 – 6.91 (m, 2H), 3.82 (s, 3H), 3.03 (s, 3H).  $^{13}\text{C}$  NMR (101 MHz,  $\text{CDCl}_3$ )  $\delta$  163.4, 157.1, 148.1, 133.6, 129.7, 121.9, 117.0, 115.4, 55.8, 44.9.

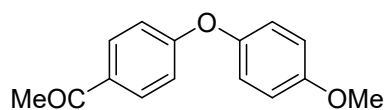

**3al**

**3al:** White solid (451 mg, 93%).  $^1\text{H}$  NMR (400 MHz,  $\text{CDCl}_3$ )  $\delta$  7.89 (d,  $J = 8.8$  Hz, 2H), 7.02 – 6.97 (m, 2H), 6.95 – 6.87 (m, 4H), 3.80 (s, 3H), 2.53 (s, 3H).  $^{13}\text{C}$  NMR (101 MHz,  $\text{CDCl}_3$ )  $\delta$  196.8, 163.0, 156.7, 148.5, 131.4, 130.6, 121.7, 116.4, 115.1, 55.7, 26.4.

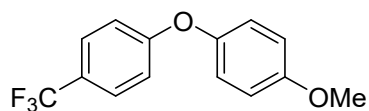

**3am**

**3am:** White solid (485 mg, 90%).  $^1\text{H}$  NMR (400 MHz,  $\text{CDCl}_3$ )  $\delta$  7.54 (d,  $J = 8.7$  Hz, 2H), 7.04 – 6.96 (m, 4H), 6.96 – 6.90 (m, 2H), 3.83 (s, 3H).  $^{19}\text{F}$  NMR (376 MHz,  $\text{CDCl}_3$ )  $\delta$  -61.7.  $^{13}\text{C}$  NMR (101 MHz,  $\text{CDCl}_3$ )  $\delta$  161.7, 156.8, 148.8, 127.2 (q,  $J = 3.7$  Hz), 124.4 (q,  $J = 271.3$  Hz), 124.4 (q,  $J = 32.7$  Hz), 121.7, 117.0, 115.3, 55.8.

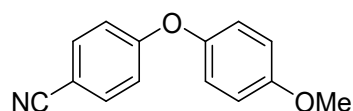

**3an**

**3an:** White solid (428 mg, 95%).  $^1\text{H}$  NMR (400 MHz,  $\text{CDCl}_3$ )  $\delta$  7.61 – 7.53 (m, 2H), 7.03 – 6.97 (m, 2H), 6.97 – 6.91 (m, 4H), 3.82 (s, 3H).  $^{13}\text{C}$  NMR (101 MHz,  $\text{CDCl}_3$ )  $\delta$  162.6, 157.1, 148.0, 134.2, 121.9, 119.1, 117.3, 115.4, 105.4, 55.8.

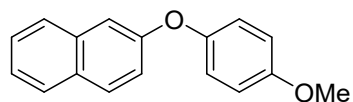

**3ao**

**3ao:** White solid (489 mg, 98%),  $^1\text{H}$  NMR (400 MHz,  $\text{CDCl}_3$ )  $\delta$  7.83 (d,  $J = 8.8$  Hz, 2H), 7.69 (d,  $J = 8.0$  Hz, 1H), 7.43 (dddd,  $J = 8.1, 6.9, 5.5, 1.3$  Hz, 2H), 7.32 – 7.27 (m, 1H), 7.23 (d,  $J = 1.7$  Hz, 1H), 7.14 – 7.06 (m, 2H), 6.96 (dd,  $J = 9.0, 1.6$  Hz, 2H), 3.85 (s, 3H).  $^{13}\text{C}$  NMR (101 MHz,  $\text{CDCl}_3$ )  $\delta$  156.6, 156.2, 150.1, 134.5, 129.9, 127.8, 127.1, 126.6, 124.5, 121.2, 119.5, 115.1, 112.3, 55.8.

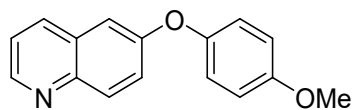

**3ap**

**3ap:** Yellow liquid (482 mg, 96%).  $^1\text{H}$  NMR (400 MHz,  $\text{CDCl}_3$ )  $\delta$  8.79 (dd,  $J = 4.2, 1.7$  Hz, 1H), 8.06 (d,  $J = 9.2$  Hz, 1H), 7.96 (dd,  $J = 8.4, 1.0$  Hz, 1H), 7.47 (dd,  $J = 9.2, 2.7$  Hz, 1H), 7.33 (dd,  $J = 8.3, 4.2$  Hz, 1H), 7.10 – 7.04 (m, 3H), 6.96 – 6.91 (m, 2H), 3.83 (s, 3H).  $^{13}\text{C}$  NMR

(101 MHz, CDCl<sub>3</sub>)  $\delta$  157.0, 156.5, 149.5, 148.8, 145.0, 135.2, 131.3, 129.2, 122.8, 121.6, 121.5, 115.2, 111.2, 55.8.

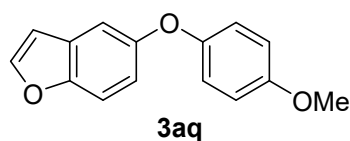

**3aq:** Colorless liquid (386 mg, 80%). <sup>1</sup>H NMR (400 MHz, CDCl<sub>3</sub>)  $\delta$  7.62 (d, *J* = 2.2 Hz, 1H), 7.44 (d, *J* = 8.9 Hz, 1H), 7.15 (d, *J* = 2.5 Hz, 1H), 7.02 – 6.95 (m, 3H), 6.91 – 6.85 (m, 2H), 6.71 – 6.68 (m, 1H), 3.81 (s, 3H). <sup>13</sup>C NMR (101 MHz, CDCl<sub>3</sub>)  $\delta$  155.6, 154.1, 151.7, 151.2, 146.2, 128.4, 120.0, 116.1, 114.9, 112.1, 110.0, 106.9, 55.8. HRMS (ESI) *m/z* calcd for C<sub>15</sub>H<sub>12</sub>O<sub>3</sub> [M]<sup>+</sup> 240.0786, found 240.0789.

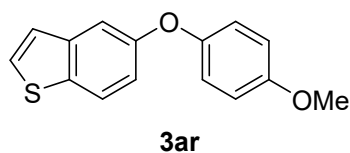

**3ar:** Yellow solid (456 mg, 89%). <sup>1</sup>H NMR (400 MHz, CDCl<sub>3</sub>)  $\delta$  7.79 (d, *J* = 8.7 Hz, 1H), 7.46 (d, *J* = 5.4 Hz, 1H), 7.32 (d, *J* = 2.4 Hz, 1H), 7.22 (d, *J* = 5.4 Hz, 1H), 7.08 (dd, *J* = 8.7, 2.3 Hz, 1H), 7.04 – 6.96 (m, 2H), 6.93 – 6.87 (m, 2H), 3.82 (s, 3H). <sup>13</sup>C NMR (101 MHz, CDCl<sub>3</sub>)  $\delta$  156.1, 155.9, 150.9, 140.8, 128.0, 123.8, 123.5, 120.6, 116.7, 115.0, 111.6, 55.8.

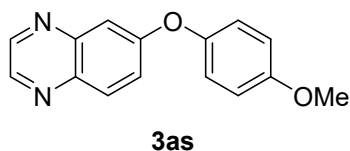

**3as:** Yellow solid (340 mg, 67%). <sup>1</sup>H NMR (400 MHz, CDCl<sub>3</sub>)  $\delta$  8.70 (dd, *J* = 9.2, 1.3 Hz, 2H), 8.04 (d, *J* = 9.2 Hz, 1H), 7.54 (dd, *J* = 9.2, 2.7 Hz, 1H), 7.31 (d, *J* = 2.7 Hz, 1H), 7.11 – 7.06 (m, 2H), 6.97 – 6.92 (m, 2H), 3.82 (s, 3H). <sup>13</sup>C NMR (101 MHz, CDCl<sub>3</sub>)  $\delta$  160.4, 157.0, 148.6, 145.3, 144.3, 143.1, 139.7, 131.0, 123.3, 122.0, 115.4, 111.9, 55.8. HRMS (ESI) *m/z* calcd for C<sub>15</sub>H<sub>13</sub>N<sub>2</sub>O<sub>2</sub> [M+H]<sup>+</sup> 253.0977, found 253.0979.

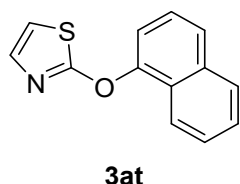

**3at:** Yellow liquid (410 mg, 90%). <sup>1</sup>H NMR (400 MHz, CDCl<sub>3</sub>)  $\delta$  8.08 – 7.97 (m, 1H), 7.84 – 7.77 (m, 1H), 7.68 (d, *J* = 8.0 Hz, 1H), 7.44 (dt, *J* = 5.6, 3.2 Hz, 2H), 7.41 – 7.37 (m, 1H), 7.34 (dd, *J* = 7.6, 1.3 Hz, 1H), 7.16 (d, *J* = 3.8 Hz, 1H), 6.71 (d, *J* = 3.8 Hz, 1H). <sup>13</sup>C NMR (101 MHz, CDCl<sub>3</sub>)  $\delta$  174.6, 151.6, 137.8, 135.1, 128.1, 126.9, 126.8, 126.5, 126.3, 125.7, 121.6, 116.4, 113.1. HRMS (ESI) *m/z* calcd for C<sub>13</sub>H<sub>10</sub>NOS [M+H]<sup>+</sup> 228.0483, found 228.0489.

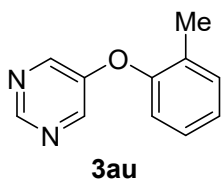

**3au:** Colorless liquid (240 mg, 65%).  $^1\text{H NMR}$  (400 MHz,  $\text{CDCl}_3$ )  $\delta$  8.91 (s, 1H), 8.37 (s, 2H), 7.29 (dd,  $J = 7.4, 0.7$  Hz, 1H), 7.25 – 7.19 (m, 1H), 7.15 (td,  $J = 7.4, 1.2$  Hz, 1H), 6.94 (dd,  $J = 7.9, 0.9$  Hz, 1H), 2.22 (s, 3H).  $^{13}\text{C NMR}$  (101 MHz,  $\text{CDCl}_3$ )  $\delta$  152.7, 145.8, 132.2, 130.0, 127.8, 125.7, 119.7, 16.1. HRMS (ESI)  $m/z$  calcd for  $\text{C}_{11}\text{H}_{11}\text{N}_2\text{O}$   $[\text{M}+\text{H}]^+$  187.0871, found 187.0876.

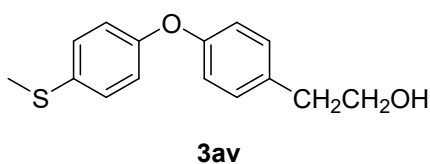

**3av:** White solid (428 mg, 82%).  $^1\text{H NMR}$  (400 MHz,  $\text{CDCl}_3$ )  $\delta$  7.18 – 7.13 (m, 2H), 7.10 – 7.05 (m, 2H), 6.86 – 6.81 (m, 4H), 3.72 (t,  $J = 6.6$  Hz, 2H), 2.73 (t,  $J = 6.6$  Hz, 2H), 2.36 (s, 3H), 1.88 (s, 1H).  $^{13}\text{C NMR}$  (101 MHz,  $\text{CDCl}_3$ )  $\delta$  155.8, 155.5, 133.5, 132.2, 130.3, 129.2, 119.5, 118.9, 63.6, 38.4, 17.2. HRMS (ESI)  $m/z$  calcd for  $\text{C}_{15}\text{H}_{16}\text{O}_2\text{S}$   $[\text{M}]^+$  260.0871, found 260.0875.

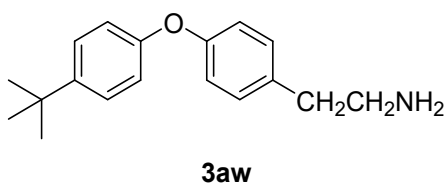

**3aw:** White solid (424 mg, 79%).  $^1\text{H NMR}$  (400 MHz,  $\text{CDCl}_3$ )  $\delta$  7.26 – 7.16 (m, 2H), 7.05 (d,  $J = 8.4$  Hz, 2H), 6.76 – 6.68 (m, 2H), 6.63 – 6.55 (m, 2H), 3.33 (t,  $J = 7.0$  Hz, 2H), 2.82 (t,  $J = 7.0$  Hz, 2H), 1.27 (s, 9H).  $^{13}\text{C NMR}$  (101 MHz,  $\text{CDCl}_3$ )  $\delta$  154.4, 145.5, 141.1, 131.2, 130.0, 126.2, 115.6, 113.5, 113.4, 45.9, 34.7, 34.0, 31.7. HRMS (ESI)  $m/z$  calcd for  $\text{C}_{18}\text{H}_{24}\text{NO}$   $[\text{M}+\text{H}]^+$  270.1858, found 270.1855.

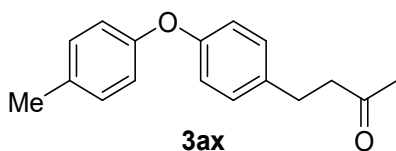

**3ax:** Light yellow liquid (356 mg, 70%).  $^1\text{H NMR}$  (400 MHz,  $\text{CDCl}_3$ )  $\delta$  7.13 (d,  $J = 8.5$  Hz, 4H), 6.94 – 6.86 (m, 4H), 2.87 (dd,  $J = 9.7, 5.2$  Hz, 2H), 2.76 (dd,  $J = 9.4, 5.2$  Hz, 2H), 2.33 (s, 3H), 2.15 (s, 3H).  $^{13}\text{C NMR}$  (101 MHz,  $\text{CDCl}_3$ )  $\delta$  208.2, 156.1, 155.1, 135.6, 132.8, 130.3, 129.6, 119.0, 118.6, 45.4, 30.2, 29.1, 20.8. HRMS (ESI)  $m/z$  calcd for  $\text{C}_{17}\text{H}_{19}\text{O}_2$   $[\text{M}+\text{H}]^+$  255.1385, found 255.1389.



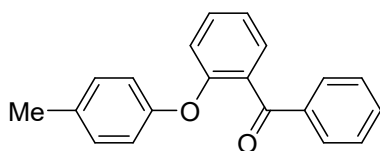

**3ay**

**3ay:** Yellow liquid (426 mg, 74%).  $^1\text{H}$  NMR (400 MHz,  $\text{CDCl}_3$ )  $\delta$  7.89 – 7.80 (m, 2H), 7.57 – 7.49 (m, 2H), 7.45 – 7.39 (m, 3H), 7.18 (td,  $J = 7.5, 0.7$  Hz, 1H), 7.04 (d,  $J = 8.3$  Hz, 2H), 6.93 (d,  $J = 8.2$  Hz, 1H), 6.79 – 6.70 (m, 2H), 2.28 (s, 3H).  $^{13}\text{C}$  NMR (101 MHz,  $\text{CDCl}_3$ )  $\delta$  196.0, 155.5, 154.2, 137.8, 133.3, 133.2, 132.0, 130.9, 130.2, 130.2, 129.9, 128.3, 123.0, 119.1, 118.3, 20.8.

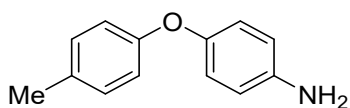

**3az**

**3az:** White solid (242 mg, 61%),  $^1\text{H}$  NMR (400 MHz,  $\text{CDCl}_3$ )  $\delta$  7.04 (d,  $J = 8.2$  Hz, 2H), 6.97 (d,  $J = 8.7$  Hz, 2H), 6.85 (d,  $J = 8.3$  Hz, 2H), 6.77 (d,  $J = 8.7$  Hz, 2H), 5.55 – 4.79 (m, 2H). 2.29 (s, 3H).  $^{13}\text{C}$  NMR (101 MHz,  $\text{CDCl}_3$ )  $\delta$  150.7, 142.5, 136.8, 129.9, 129.5, 121.5, 116.7, 116.2, 20.7.

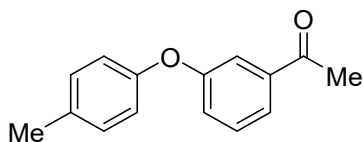

**3ba**

**3ba:** Yellow liquid (172 mg, 38%).  $^1\text{H}$  NMR (400 MHz,  $\text{CDCl}_3$ )  $\delta$  7.65 (ddd,  $J = 7.7, 1.4, 1.0$  Hz, 1H), 7.59 – 7.52 (m, 1H), 7.40 (t,  $J = 7.9$  Hz, 1H), 7.21 – 7.13 (m, 3H), 6.96 – 6.90 (m, 2H), 2.56 (s, 3H), 2.35 (s, 3H).  $^{13}\text{C}$  NMR (101 MHz,  $\text{CDCl}_3$ )  $\delta$  197.6, 158.4, 154.2, 138.9, 133.6, 130.5, 129.9, 122.9, 122.8, 119.4, 117.6, 26.8, 20.8.

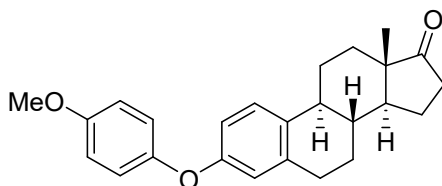

**3bf**

**3bf:** White solid (580 mg, 77%).  $^1\text{H}$  NMR (400 MHz,  $\text{CDCl}_3$ )  $\delta$  7.21 (d,  $J = 8.6$  Hz, 1H), 6.99 – 6.95 (m, 2H), 6.90 – 6.85 (m, 2H), 6.74 (dd,  $J = 8.5, 2.6$  Hz, 1H), 6.68 (d,  $J = 2.5$  Hz, 1H), 3.80 (s, 3H), 2.89 – 2.82 (m, 2H), 2.51 (dd,  $J = 18.8, 8.6$  Hz, 1H), 2.43 – 2.36 (m, 1H), 2.31 – 2.23 (m, 1H), 2.20 – 1.93 (m, 4H), 1.63 – 1.37 (m, 6H), 0.92 (s, 3H).  $^{13}\text{C}$  NMR (101 MHz,  $\text{CDCl}_3$ )  $\delta$  221.0, 156.5, 155.9, 150.4, 138.2, 134.0, 126.6, 120.8, 117.7, 115.2, 114.9, 55.8, 50.6,

---

48.1, 44.2, 38.4, 36.0, 31.7, 29.7, 26.6, 26.0, 21.7, 14.0.

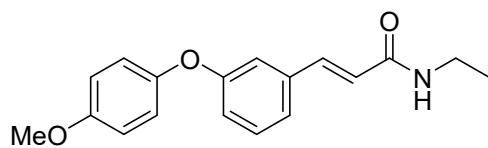

**3bg**

**3bg**: Yellow solid (350 mg, 59%),  $^1\text{H}$  NMR (400 MHz,  $\text{CDCl}_3$ )  $\delta$  7.52 (d,  $J = 15.6$  Hz, 1H), 7.27 – 7.21 (m, 1H), 7.13 (d,  $J = 7.7$  Hz, 1H), 7.05 – 7.02 (m, 1H), 6.99 – 6.94 (m, 2H), 6.92 – 6.86 (m, 3H), 6.32 (d,  $J = 15.6$  Hz, 1H), 5.96 (s, 1H), 3.80 (s, 3H), 3.44 – 3.34 (m, 2H), 1.18 (t,  $J = 7.3$  Hz, 3H).  $^{13}\text{C}$  NMR (101 MHz,  $\text{CDCl}_3$ )  $\delta$  165.8, 159.1, 156.2, 149.7, 140.2, 136.7, 130.1, 122.3, 121.6, 121.1, 118.8, 116.1, 115.1, 55.8, 34.7, 14.9. HRMS (ESI)  $m/z$  calcd for  $\text{C}_{18}\text{H}_{20}\text{NO}_3$   $[\text{M}+\text{H}]^+$  298.1443, found 298.1447.

## 6. Reference

[1] Chen, Z. X.; Jiang, Y. W.; Zhang, L.; Guo, Y. L.; Ma, D. W. Oxalic Diamides and tert-Butoxide: Two Types of Ligands Enabling Practical Access to Alkyl Aryl Ethers via Cu-Catalyzed Coupling Reaction. *J. Am. Chem. Soc.* 2019, **141**, 3541-3549.

[2] Testa, M. L.; Zaballos, E.; Zaragoza, R. J. Reactivity of  $\beta$ -amino alcohols against dialkyl oxalate: synthesis and mechanism study in the formation of substituted oxalamide and/or morpholine-2,3-dione derivatives. *Tetrahedron*, 2012, **68**, 9583-9591.

## 7. NMR spectra for ligands and products

YXT-L6-DMSO

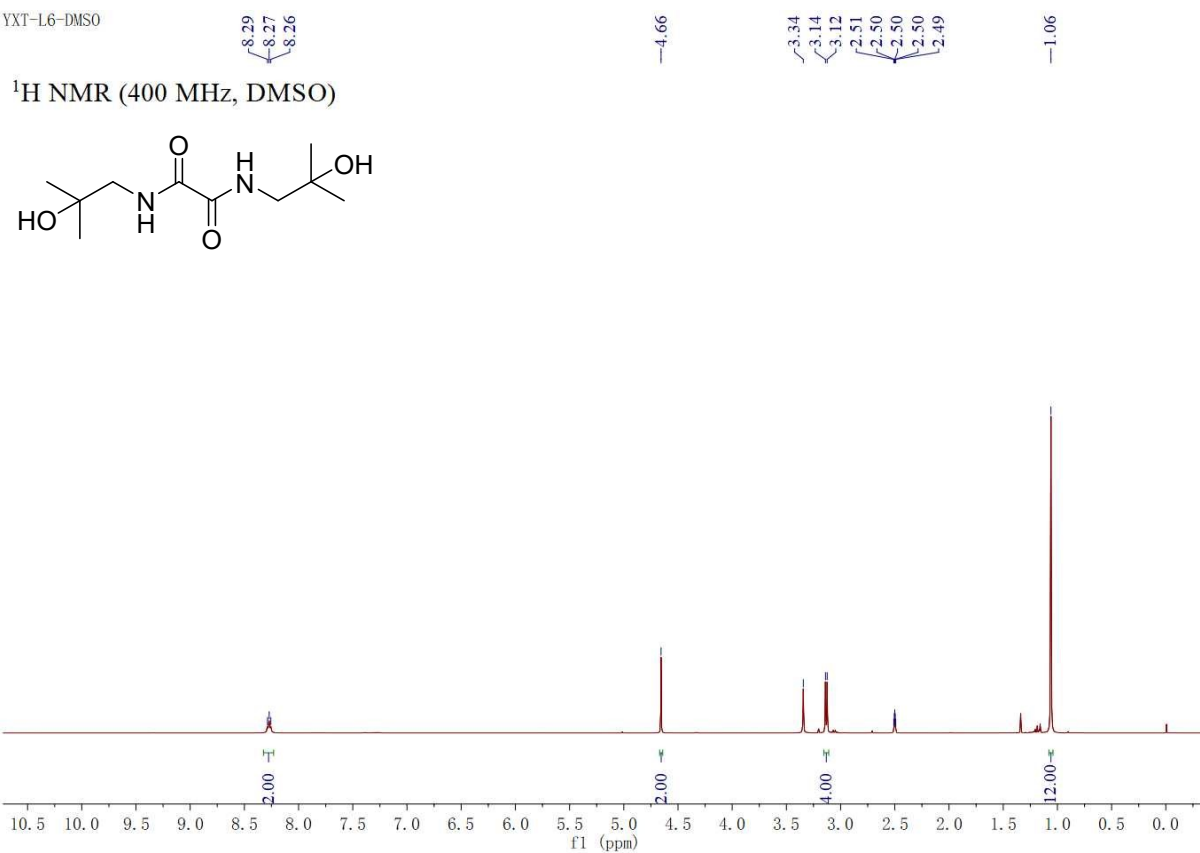

YXT-L6-DMSO-C

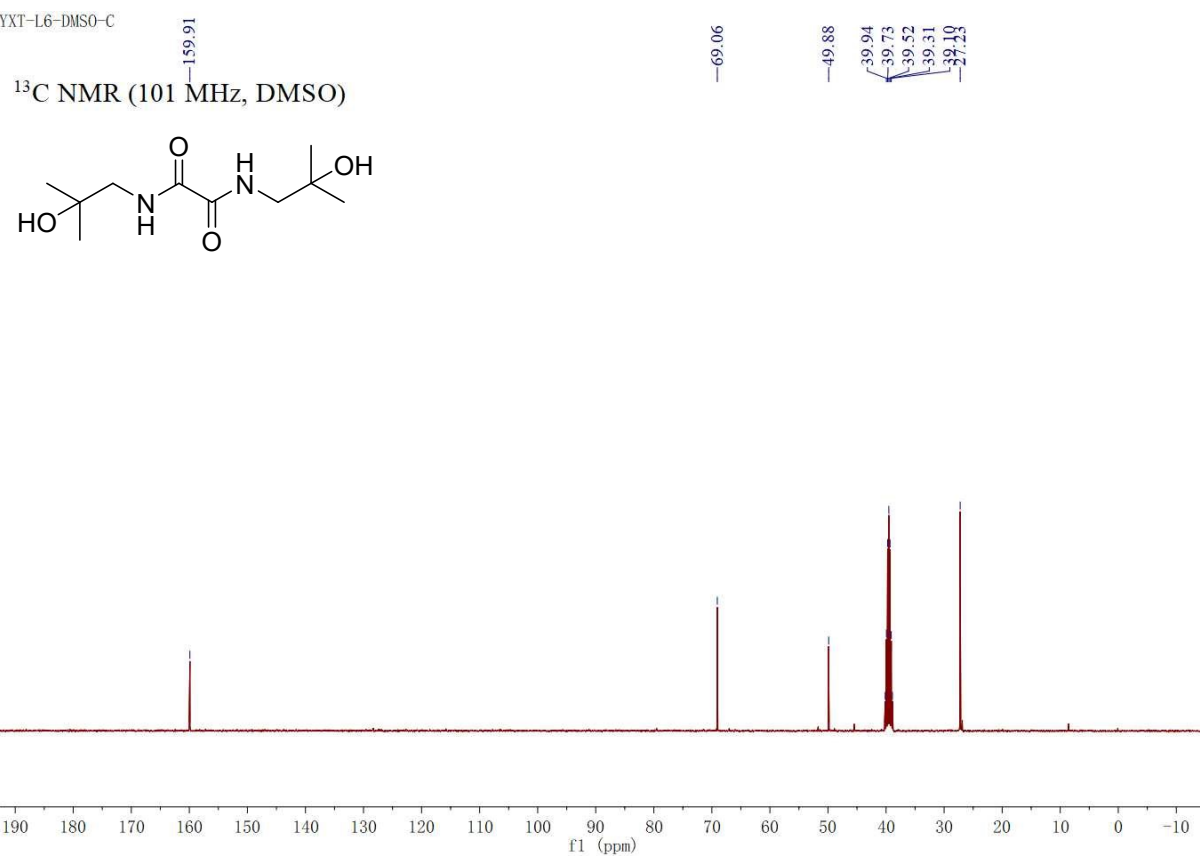

YXT-L9-DMSO

$^1\text{H}$  NMR (400 MHz, DMSO)

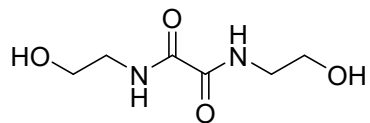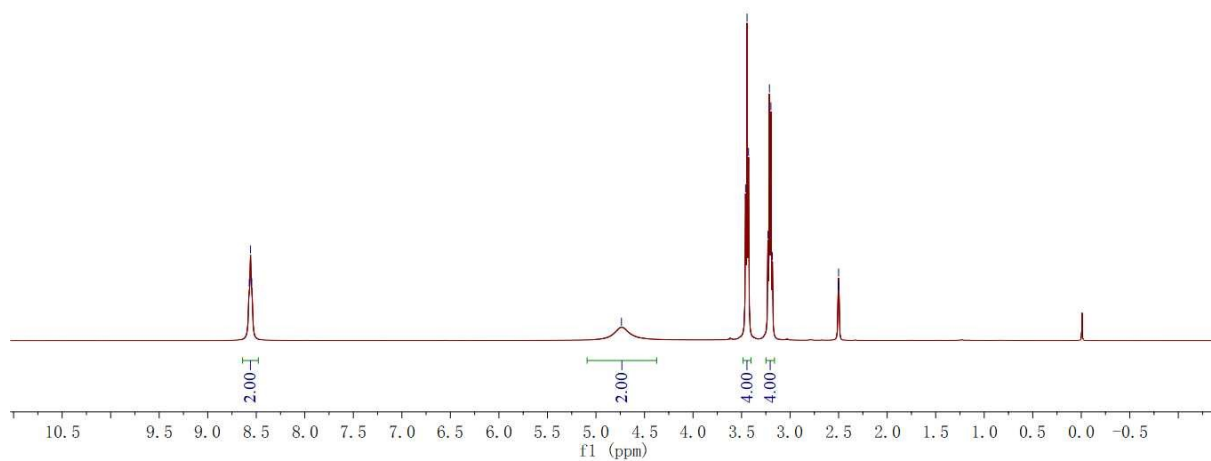

YXT-L9-DMSO-C

$^{13}\text{C}$  NMR (101 MHz, DMSO)

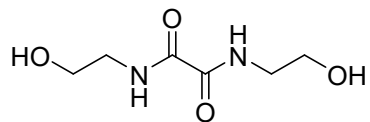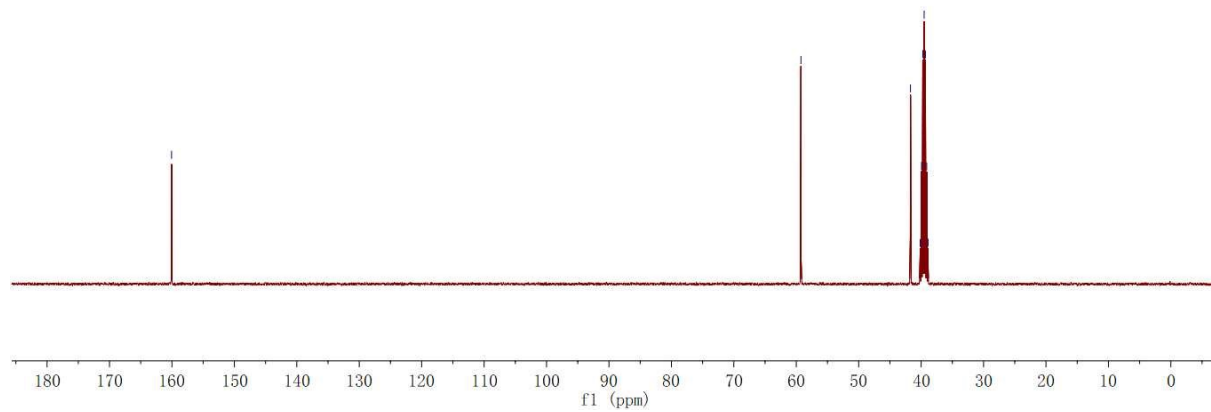

0306-YXT-L25

-7.74  
-7.26

3.50  
3.50  
3.48  
3.48  
3.47  
3.45  
3.44  
3.33

$^1\text{H}$  NMR (400 MHz,  $\text{CDCl}_3$ )

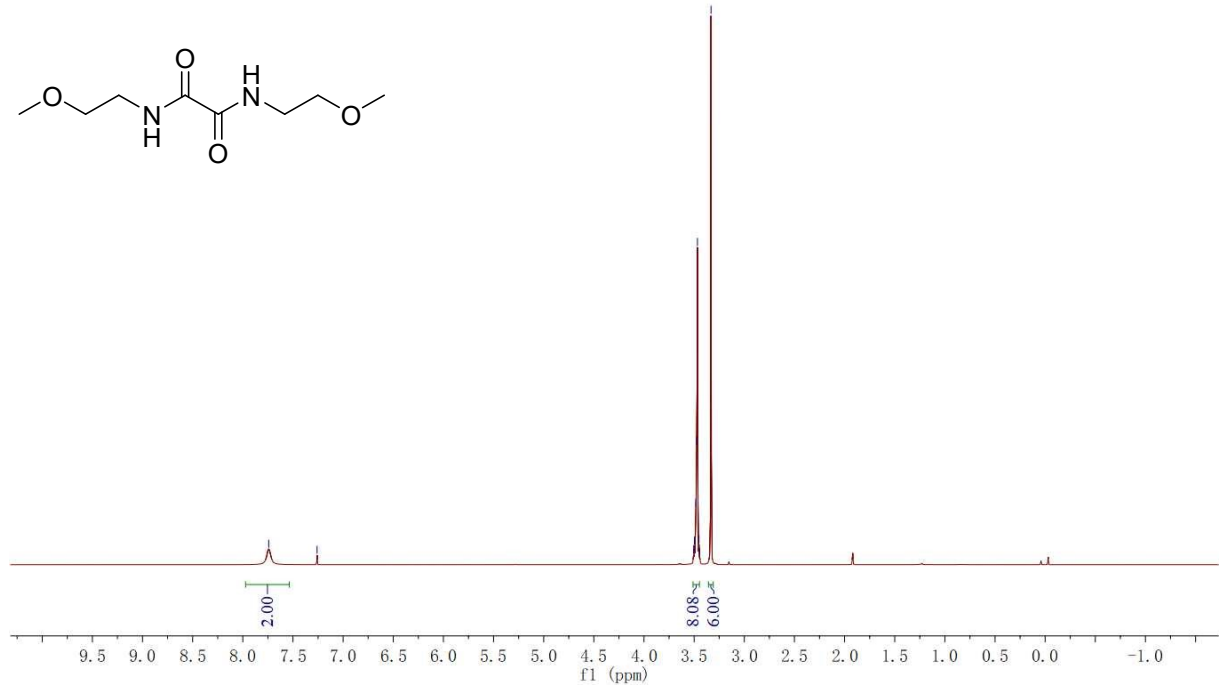

0323-yxt-124-c

-159.91

77.48  
77.16  
76.84  
70.66

-58.93

-39.55

$^{13}\text{C}$  NMR (101 MHz,  $\text{CDCl}_3$ )

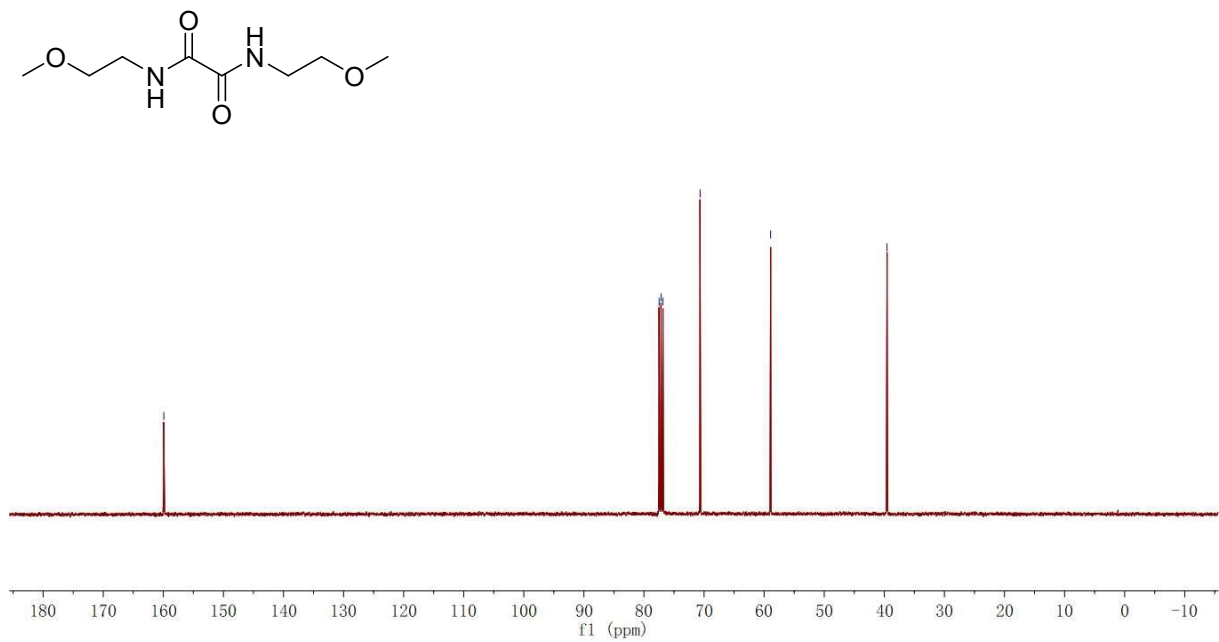

0306-YXT-L26

-7.79  
-7.26

3.61  
3.60  
3.60  
3.59  
3.58  
3.57  
3.53  
3.53  
3.52  
3.51  
3.50  
3.37

$^1\text{H}$  NMR (400 MHz,  $\text{CDCl}_3$ )

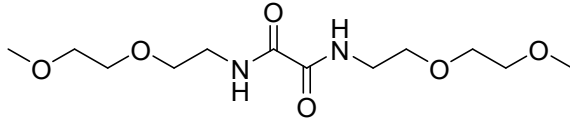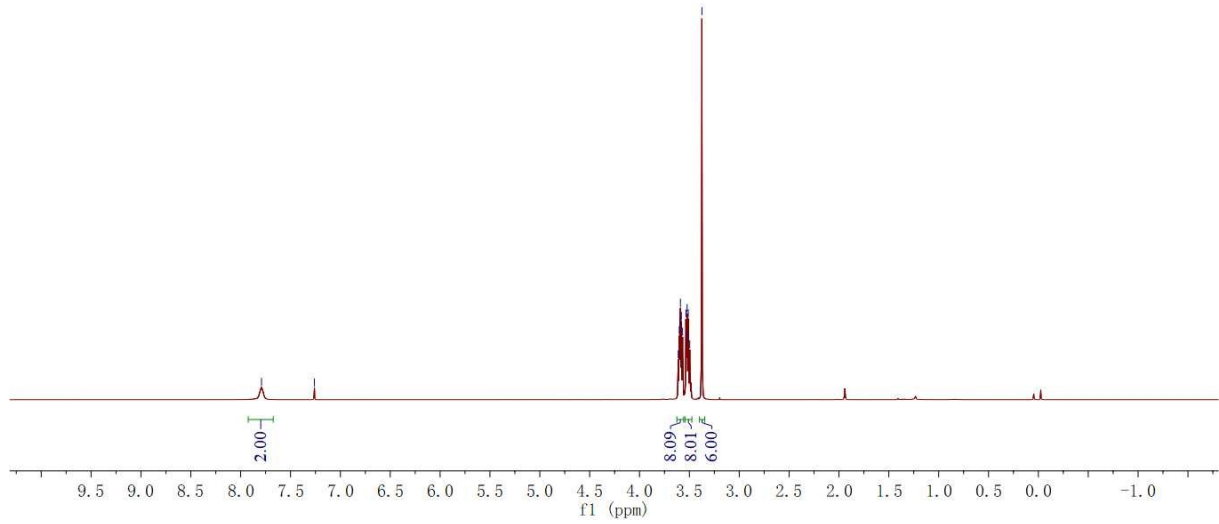

YXT-L26- $\text{CDCl}_3$ -C

-159.90

77.48  
77.16  
76.84  
71.96  
70.48  
69.46  
-59.19  
-39.57

$^{13}\text{C}$  NMR (101 MHz,  $\text{CDCl}_3$ )

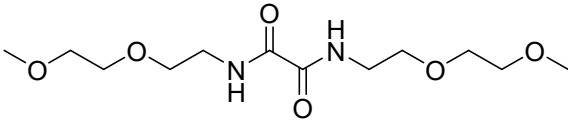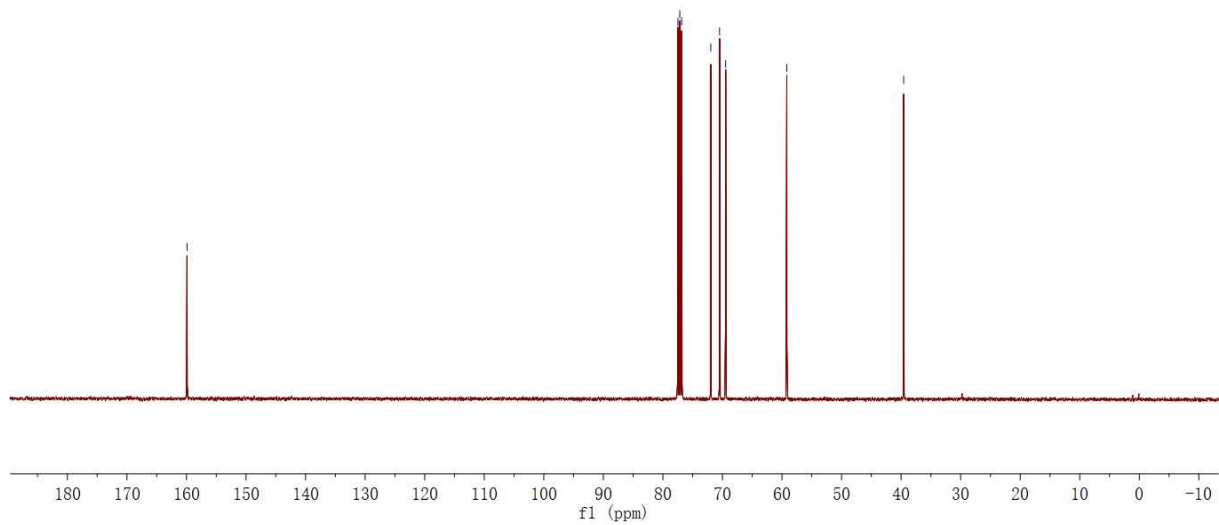

YXT-L34-DMSO

8.72  
8.71  
8.69

3.32  
3.31  
3.29  
3.21  
3.20  
3.18  
3.16  
3.15  
2.50  
1.72  
1.70  
1.68  
1.67  
1.65

$^1\text{H}$  NMR (400 MHz, DMSO)

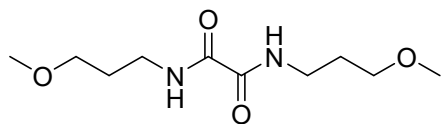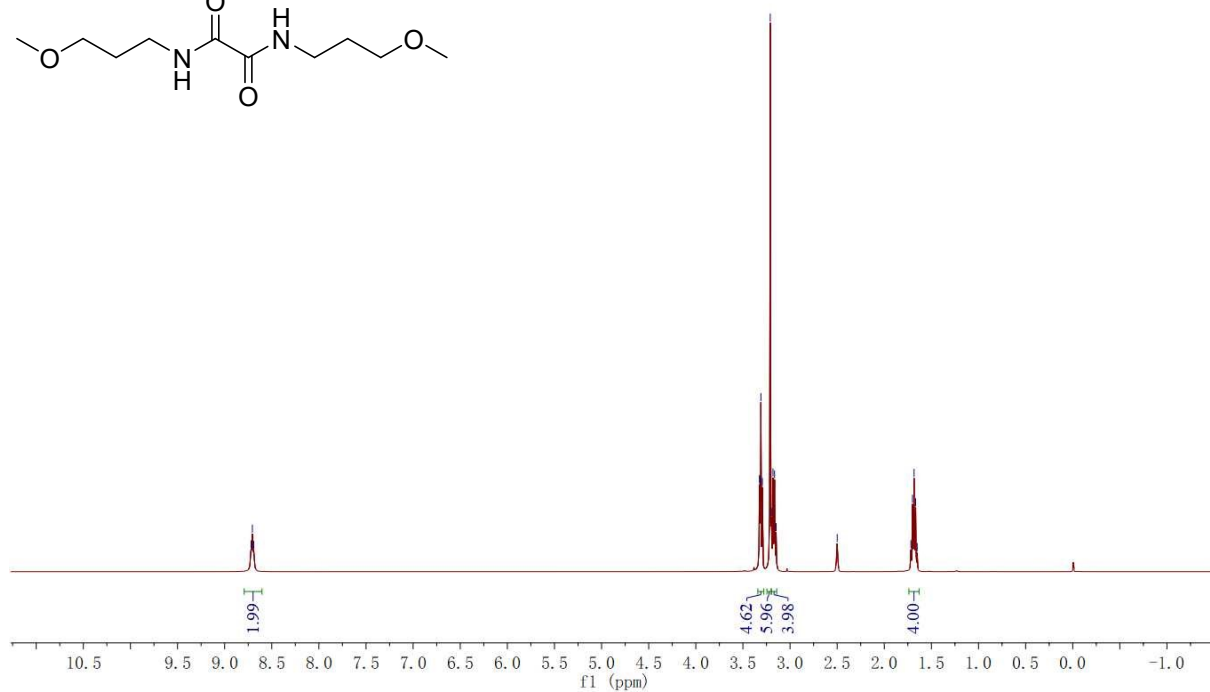

YXT-L34-DMSO-C

159.99

69.79

57.91

40.15  
39.94  
39.73  
39.52  
39.31  
39.10  
38.82

$^{13}\text{C}$  NMR (101 MHz, DMSO)

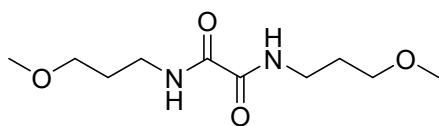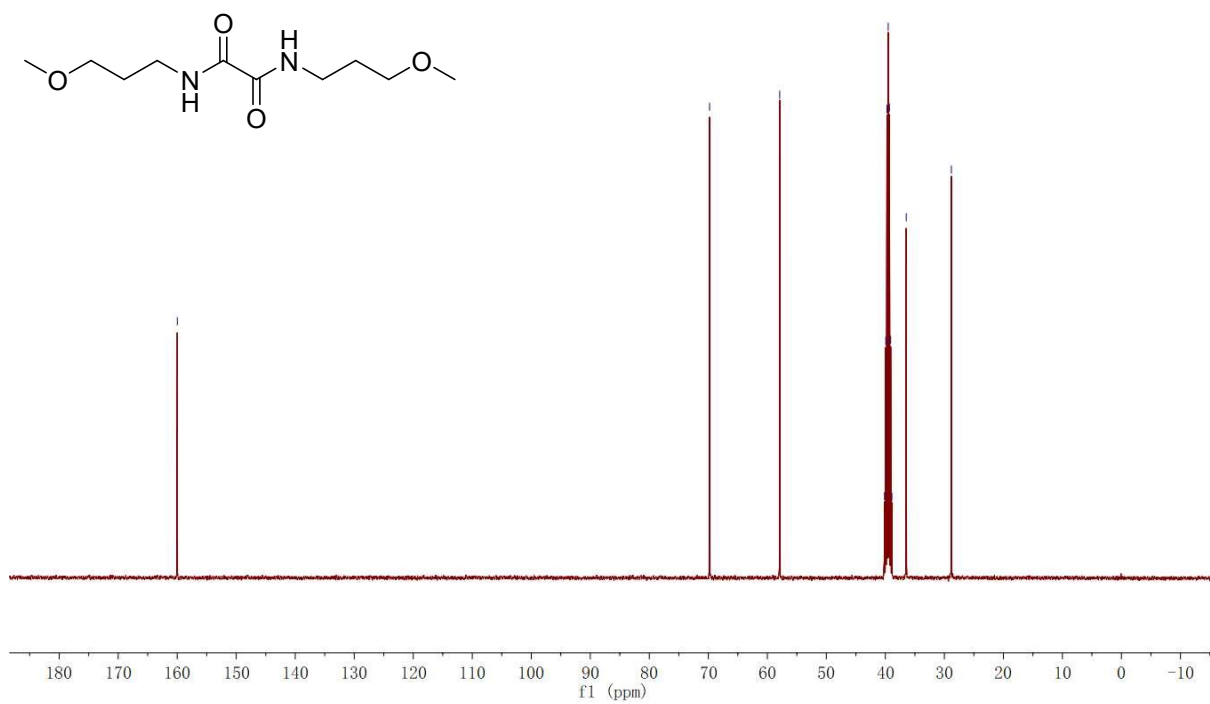

YXT-L36-DMSO

8.81  
8.80  
8.79

3.36  
3.34  
3.32  
3.31  
2.61  
2.59  
2.57  
2.50  
2.06

$^1\text{H}$  NMR (400 MHz, DMSO)

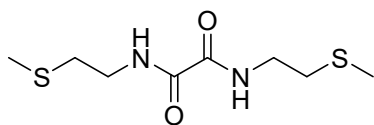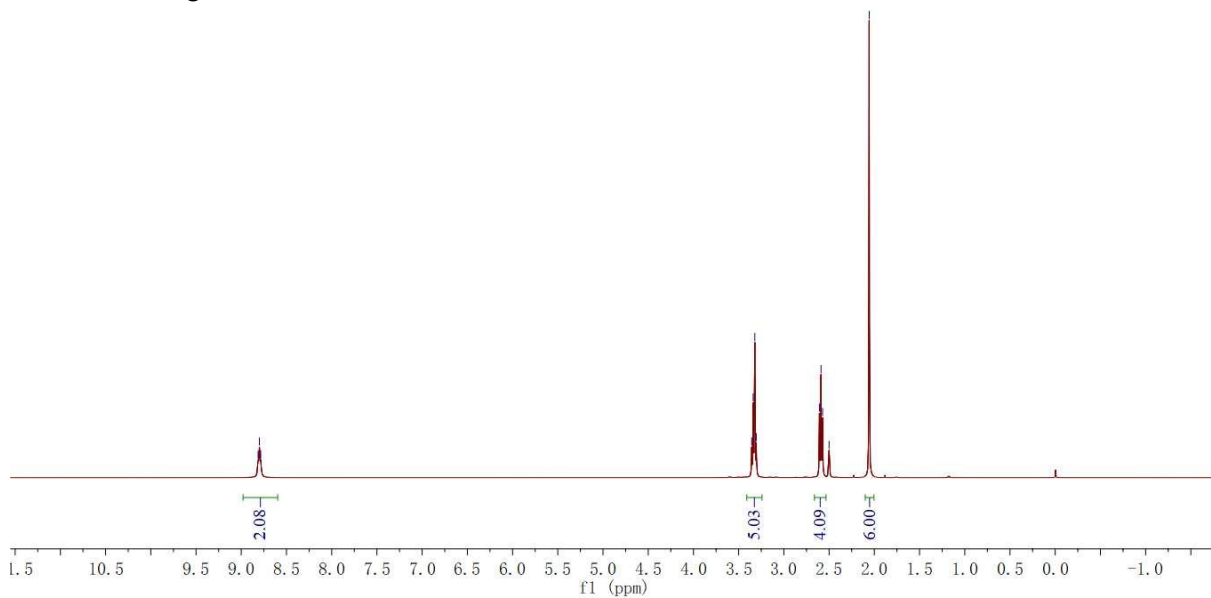

YXT-L36-DMSO-C

159.87

40.15  
39.94  
39.73  
39.52  
39.31  
39.10  
38.89  
37.96  
32.17  
14.38

$^{13}\text{C}$  NMR (101 MHz, DMSO)

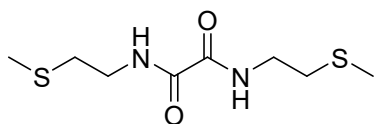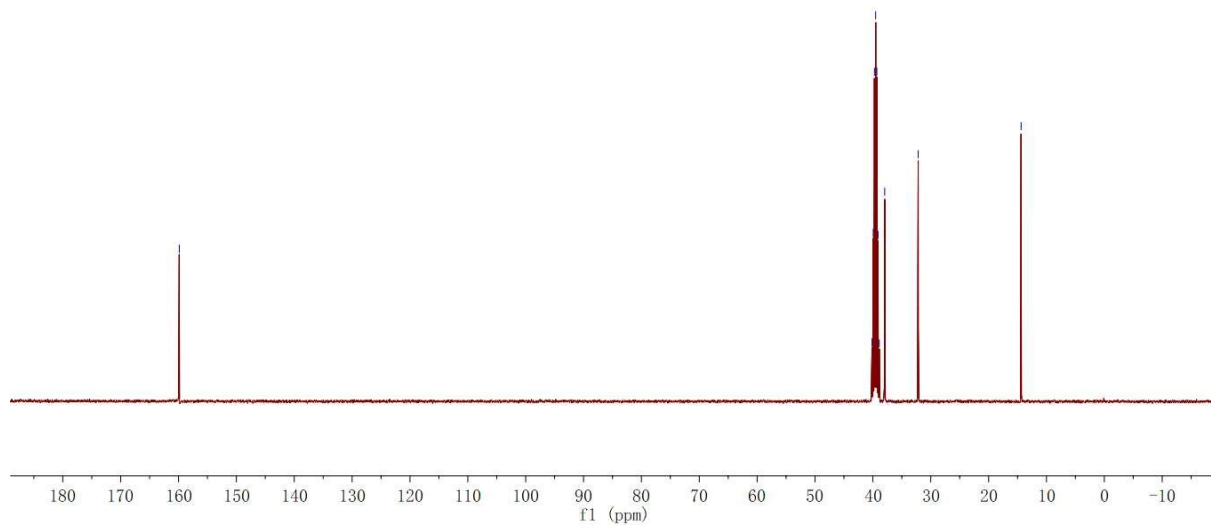



YXT-L37-DMSO

8.78  
8.77  
8.76

3.32  
3.23  
3.21  
3.19  
3.18  
2.50  
2.02  
1.75  
1.74  
1.72  
1.70  
1.68

$^1\text{H}$  NMR (400 MHz, DMSO)

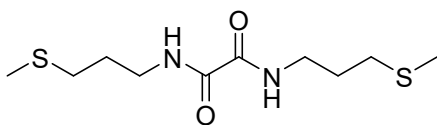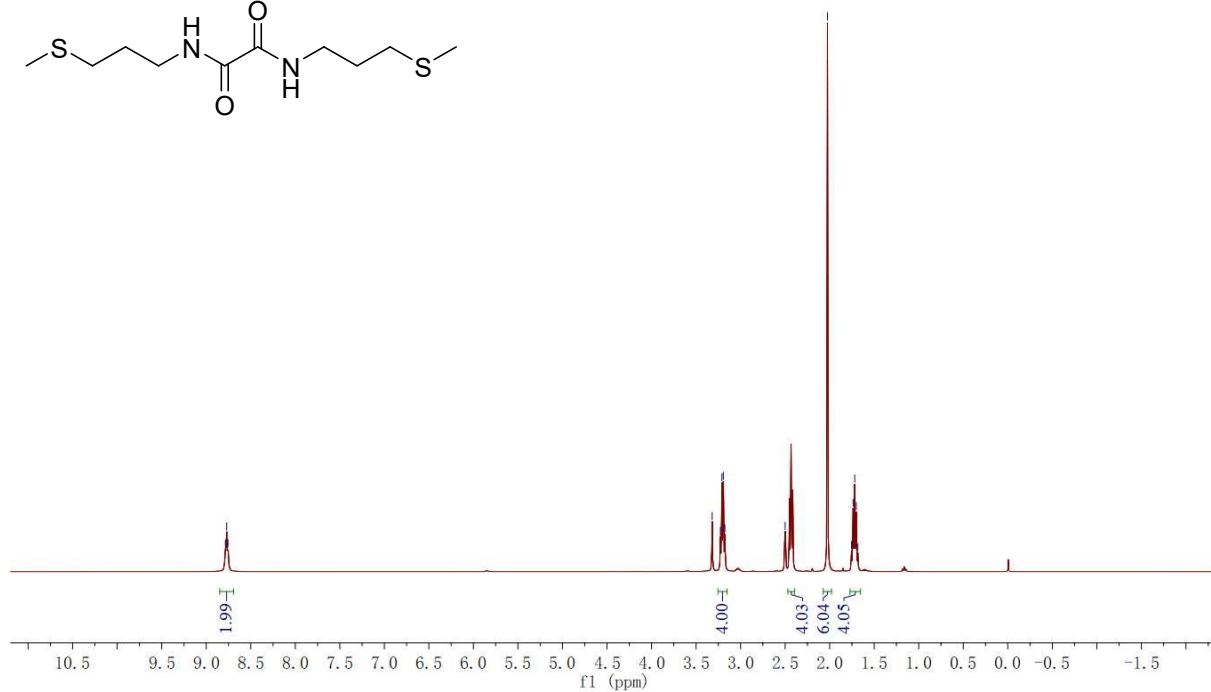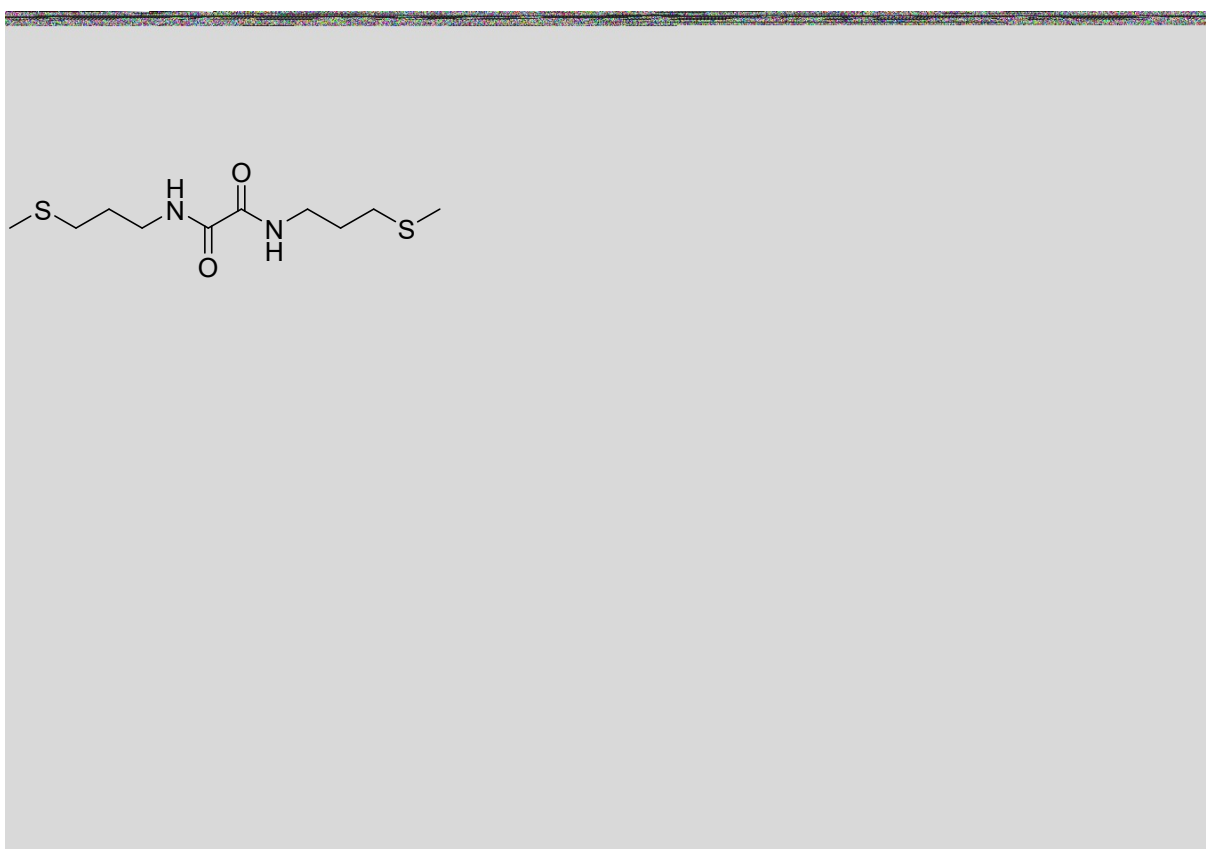

YXT-L50-DMSO

<sup>1</sup>H NMR (400 MHz, DMSO)

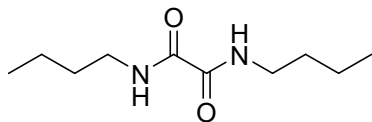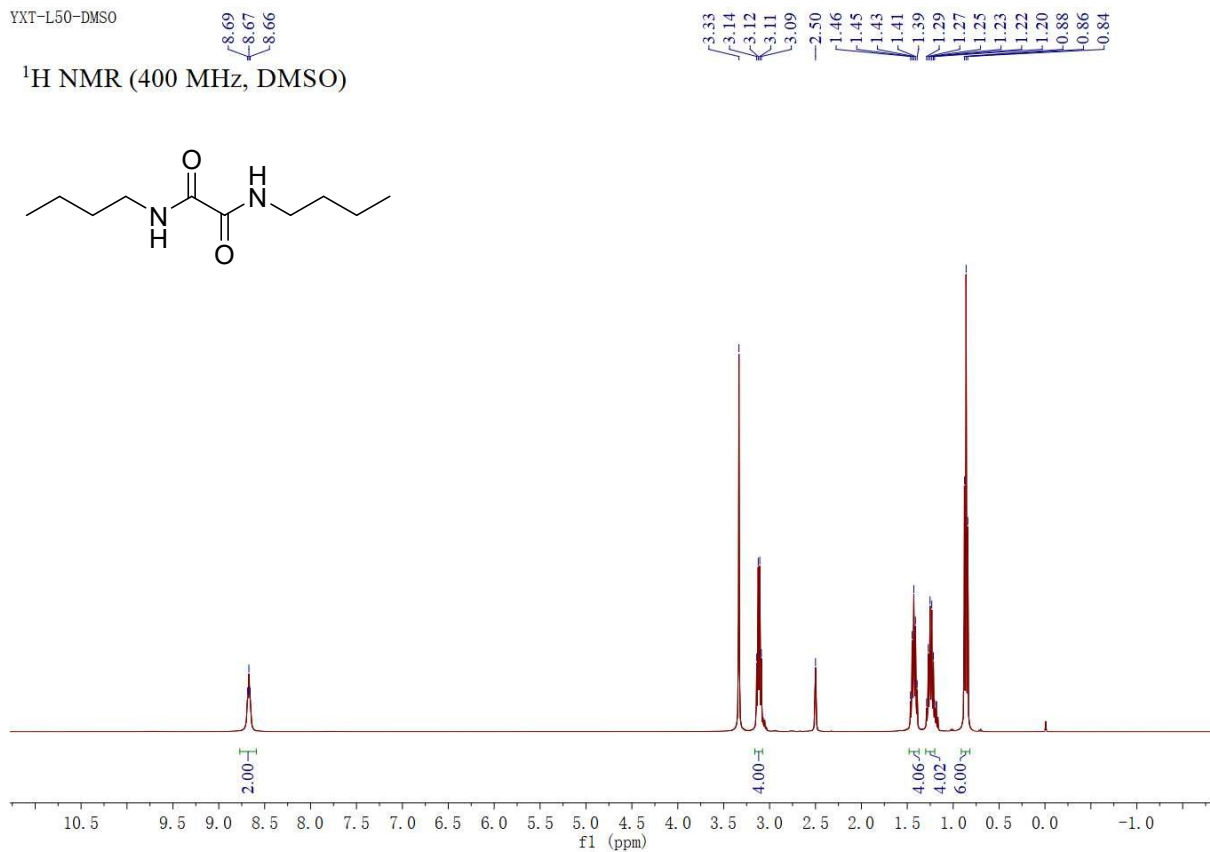

YXT-L50-DMSO-C

<sup>13</sup>C NMR (101 MHz, DMSO)

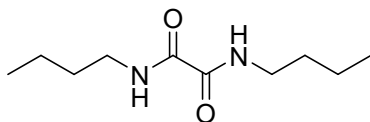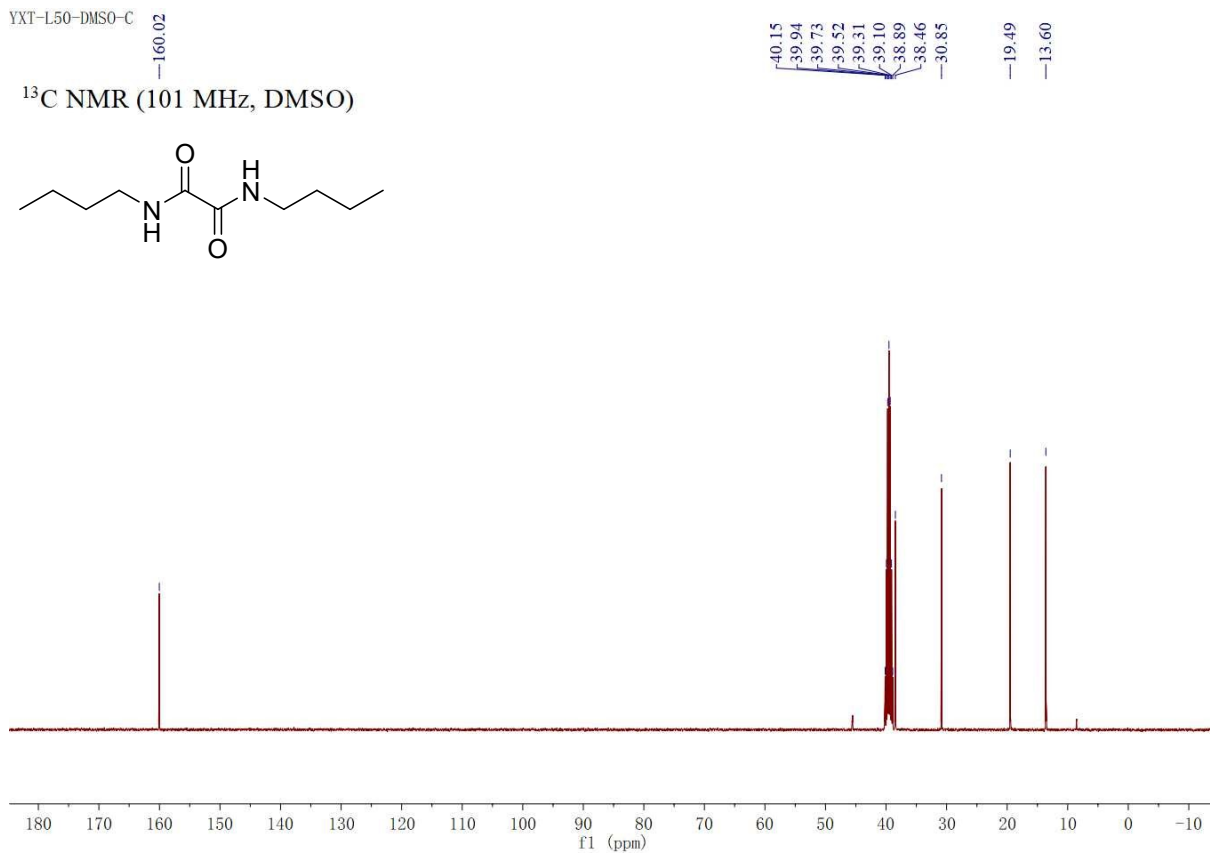

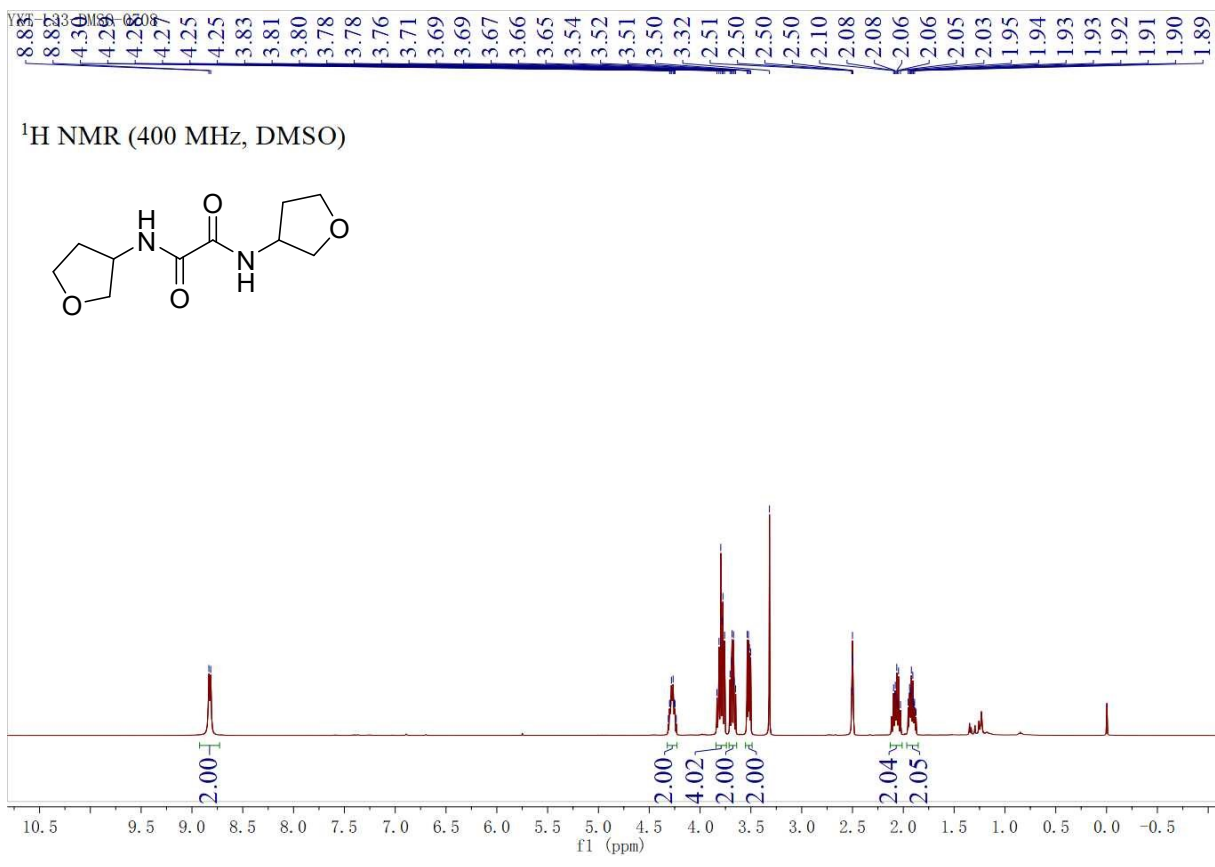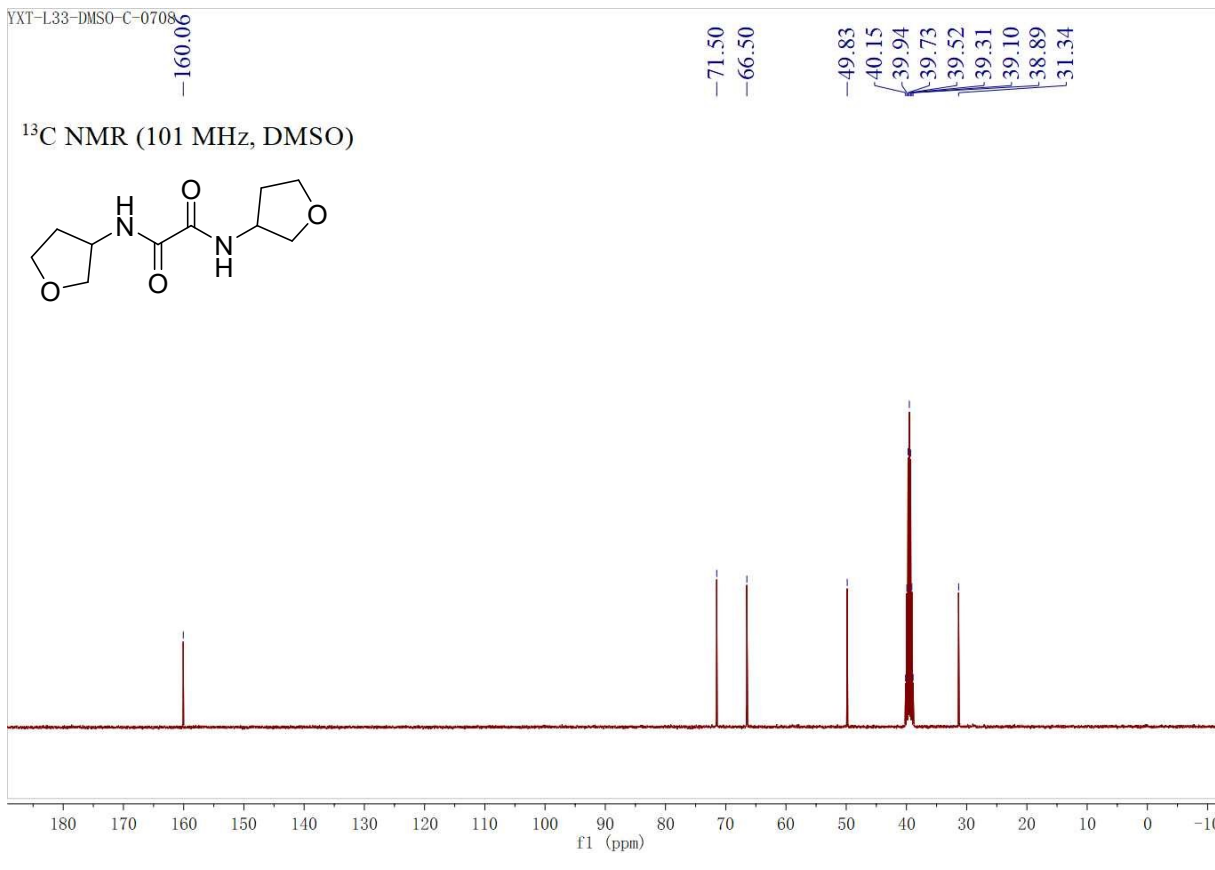

YXT-L58-DMSO  
9.51  
9.49

4.90  
4.88  
4.86  
4.85  
4.83  
4.81  
4.68  
4.66  
4.64  
4.61  
4.60  
4.58  
-3.32  
2.51  
2.50  
2.50  
2.49

$^1\text{H}$  NMR (400 MHz, DMSO)

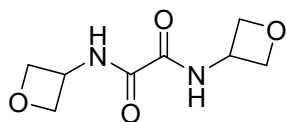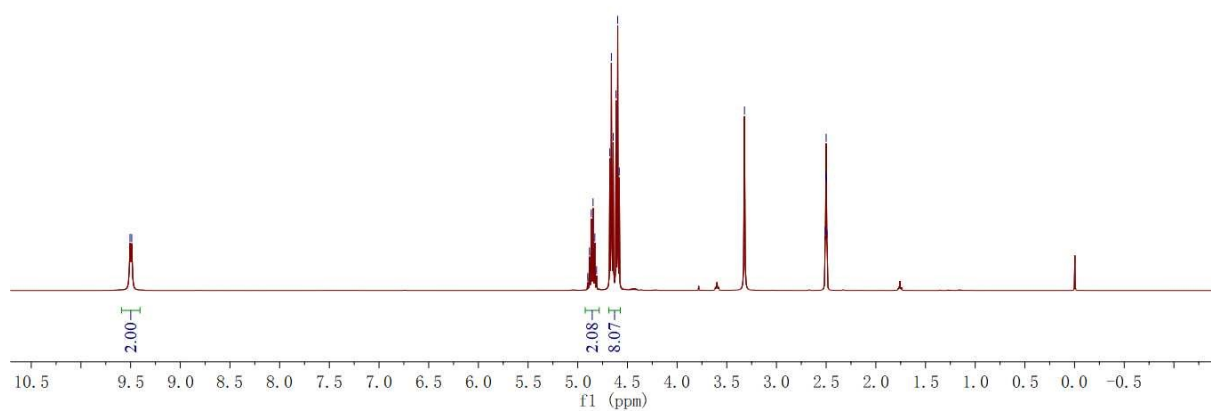

YXT-L58-DMSO-C

159.44

76.22

44.06  
39.94  
39.73  
39.52  
39.31  
39.10

$^{13}\text{C}$  NMR (101 MHz, DMSO)

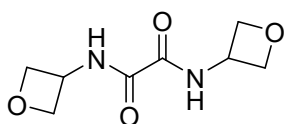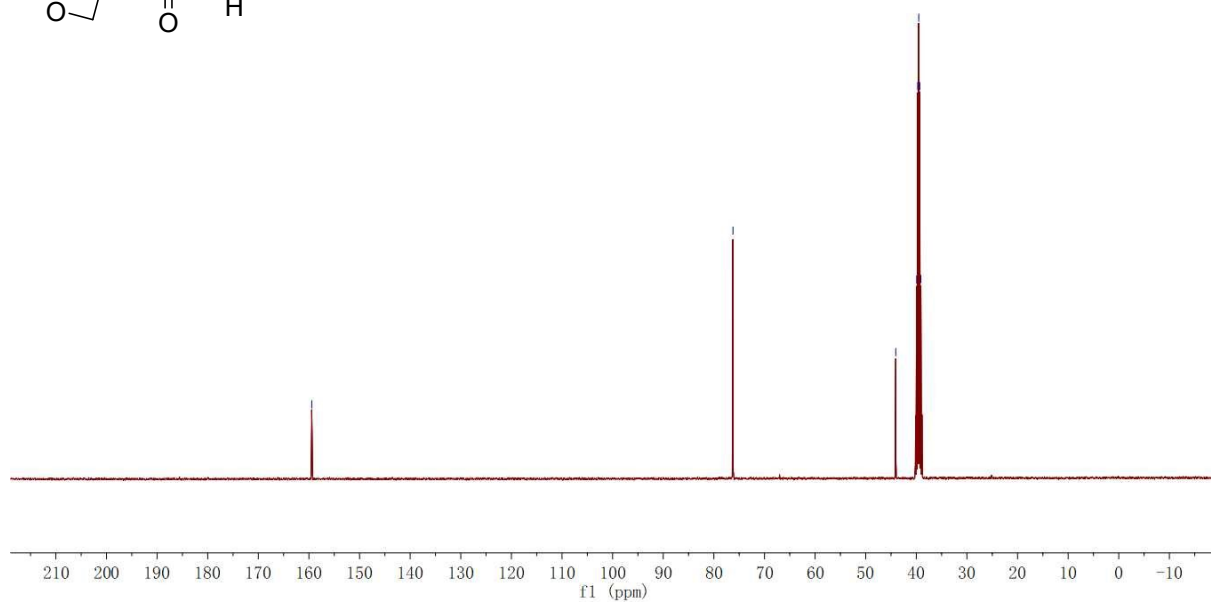

YXT-L61-DMSO

8.62  
8.60  
8.59

3.95  
3.94  
3.92  
3.91  
3.89  
3.76  
3.74  
3.74  
3.73  
3.71  
3.63  
3.61  
3.59  
3.57  
3.32  
2.50  
2.50  
1.86  
1.85  
1.84  
1.84  
1.83  
1.82  
1.82  
1.80  
1.80  
1.79  
1.78  
1.77  
1.76  
1.55  
1.54  
1.53  
1.52

<sup>1</sup>H NMR (400 MHz, DMSO)

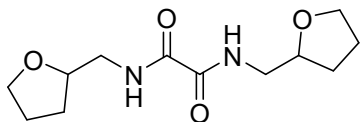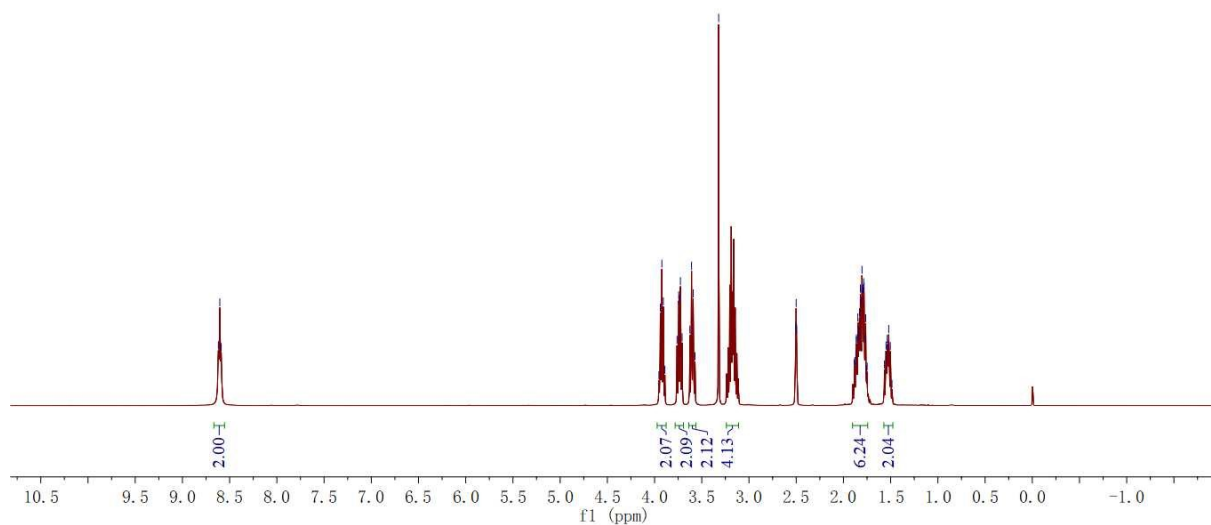

YXT-C61-DMSO-C

159.97

76.47

67.07

42.95

39.94

39.73

39.52

39.31

39.10

28.51

24.99

<sup>13</sup>C NMR (101 MHz, DMSO)

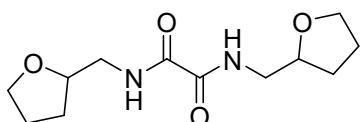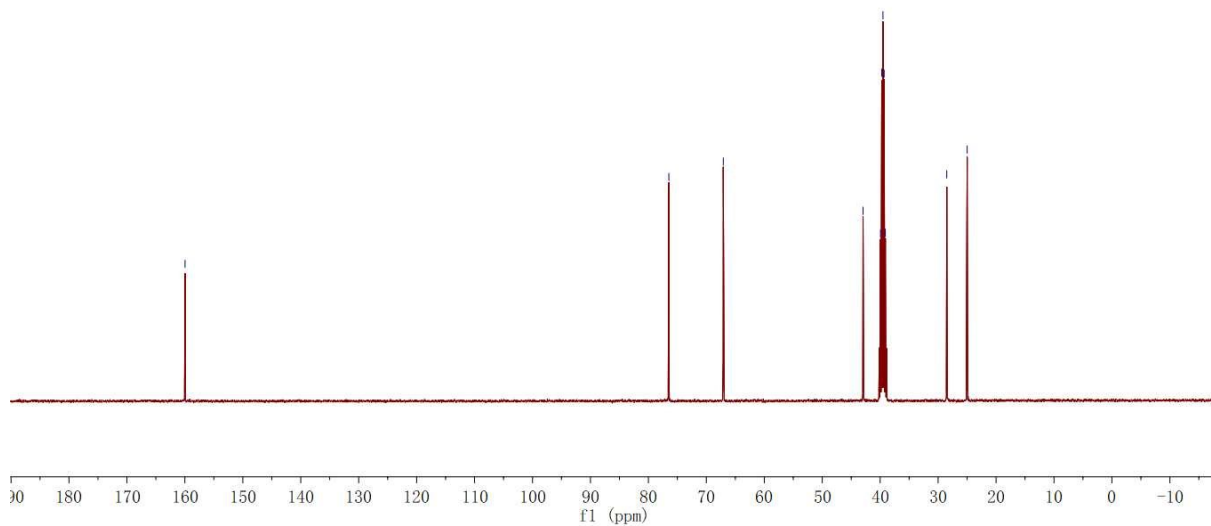

YXT-L64-CDCL3  
single\_pulse

<sup>1</sup>H NMR (500 MHz, Chloroform-*d*)

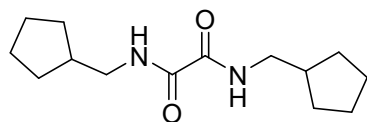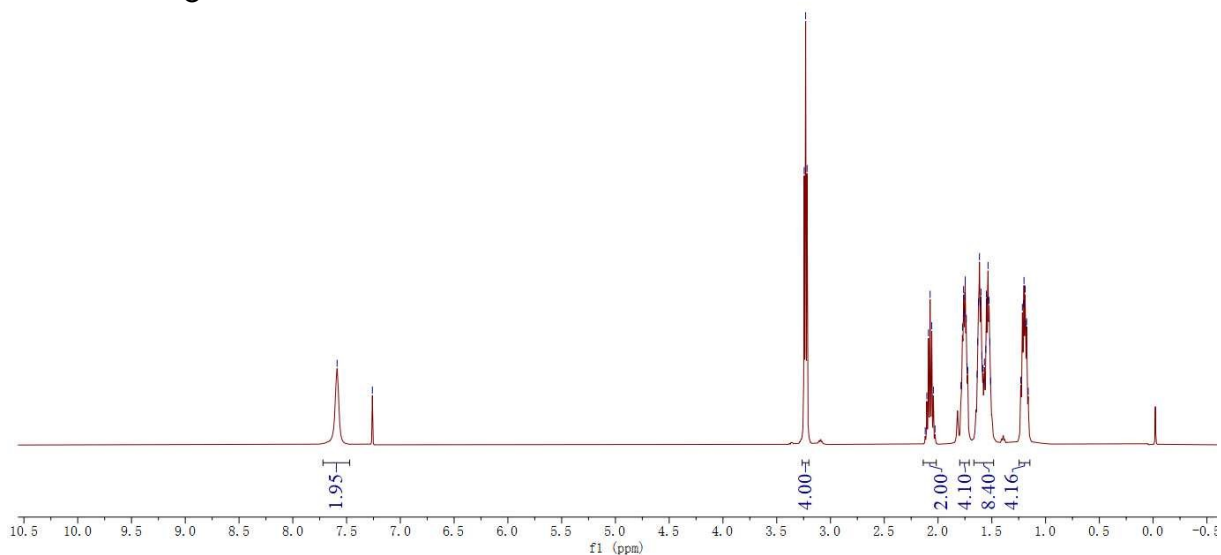

YXT-L64-CDCL3-C  
single pulse decoupled gated NOE

<sup>13</sup>C NMR (126 MHz, Chloroform-*d*)

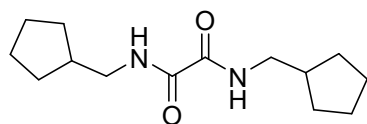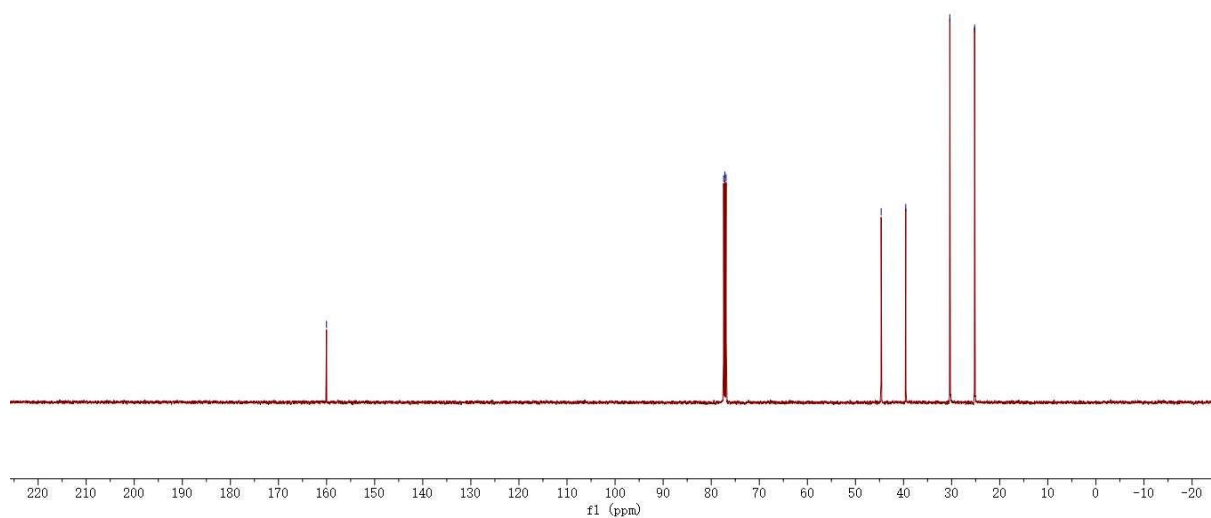

YXT-395-CDCl<sub>3</sub>

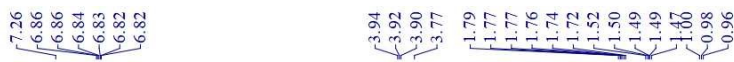

<sup>1</sup>H NMR (400 MHz, CDCl<sub>3</sub>)

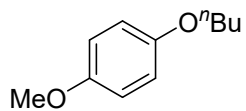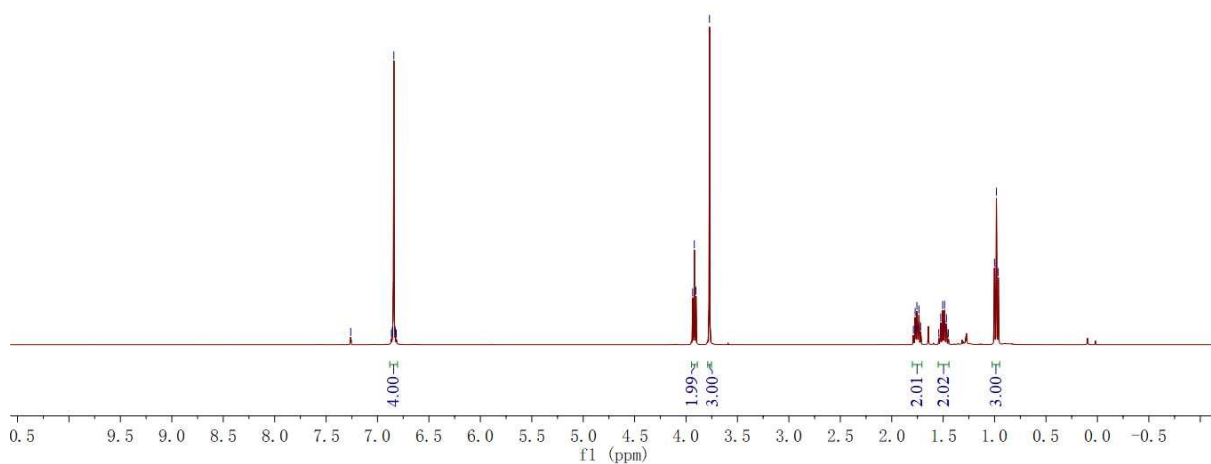

YXT-395-CDCl<sub>3</sub>-C

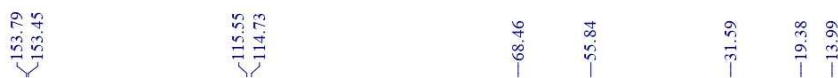

<sup>13</sup>C NMR (101 MHz, CDCl<sub>3</sub>)

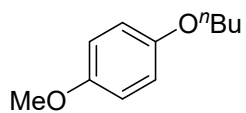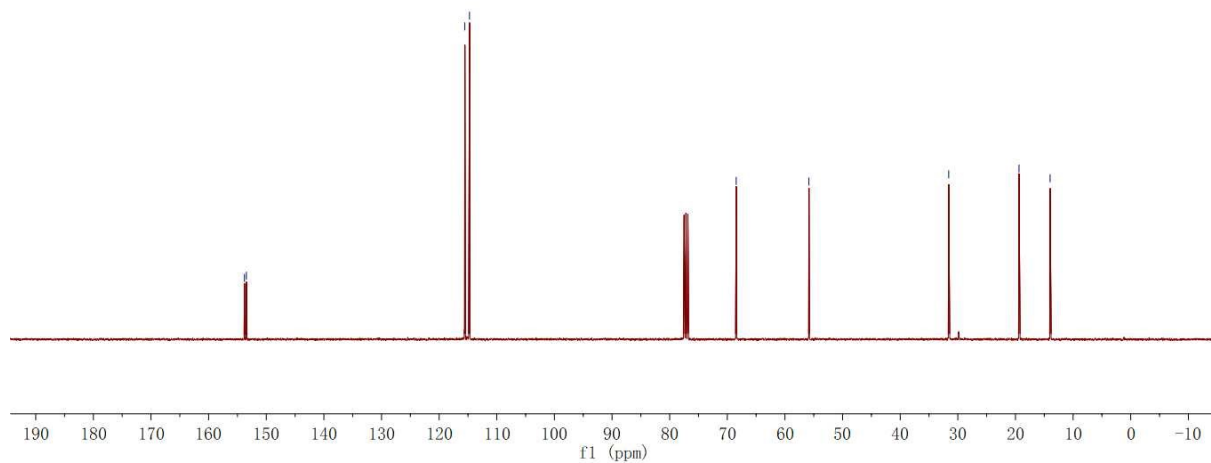

0630-yxt-322-a  
 7.58, 7.56, 7.56, 7.55, 7.54, 7.53, 7.53, 7.52, 7.45, 7.44, 7.43, 7.41, 7.33, 7.31, 7.26, 7.01, 7.00, 6.99, 6.98, 6.97, 4.04, 4.02, 4.01, 1.85, 1.83, 1.83, 1.82, 1.80, 1.78, 1.58, 1.57, 1.55, 1.53, 1.03, 1.01, 0.99

<sup>1</sup>H NMR (400 MHz, CDCl<sub>3</sub>)

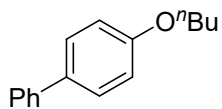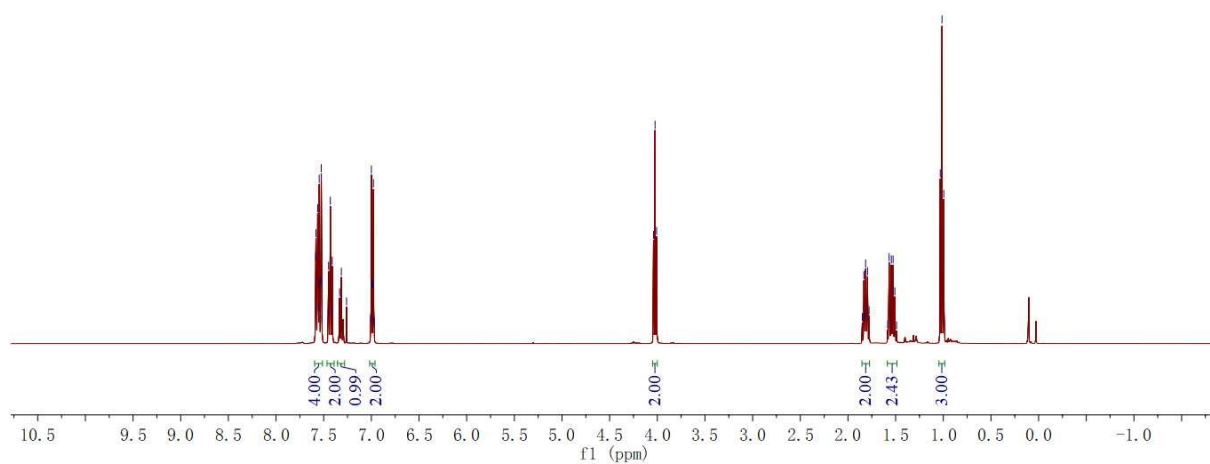

0630-yxt-322-a-c  
 158.88, 141.04, 133.67, 128.84, 128.24, 126.85, 126.72, 114.91, 77.48, 77.16, 76.84, 67.91, 31.50, 19.41, 14.01

<sup>13</sup>C NMR (101 MHz, CDCl<sub>3</sub>)

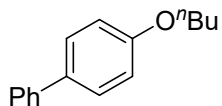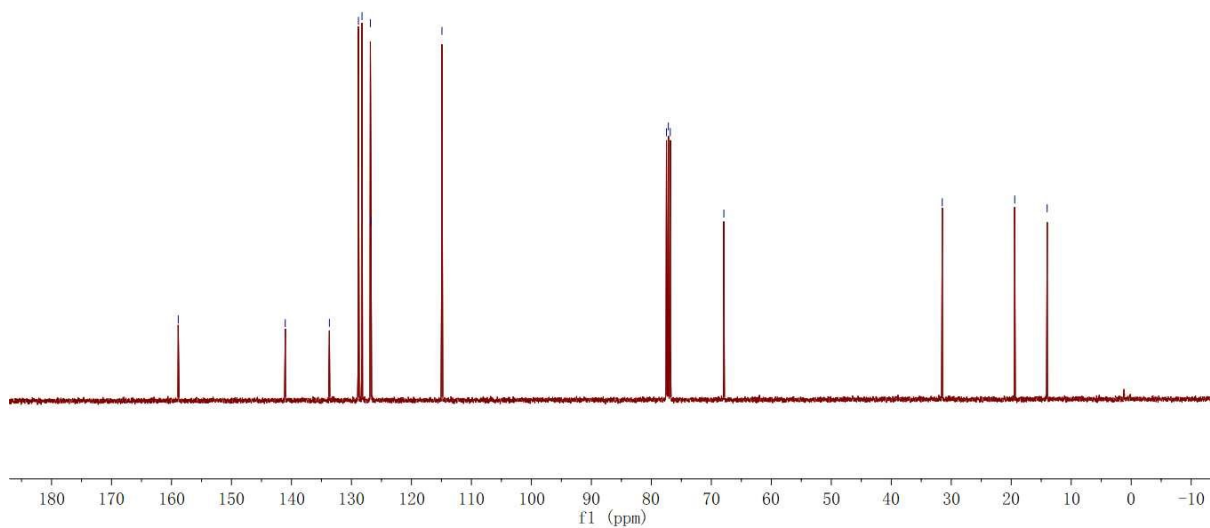



0630-yxt-322-b-h

7.20  
7.19  
7.18  
7.17  
7.16  
6.78  
6.77  
6.77  
6.75  
6.74  
3.87  
3.85  
3.84  
-2.36  
1.69  
1.67  
1.65  
1.41  
1.39  
0.89  
0.87

$^1\text{H}$  NMR (400 MHz,  $\text{CDCl}_3$ )

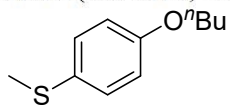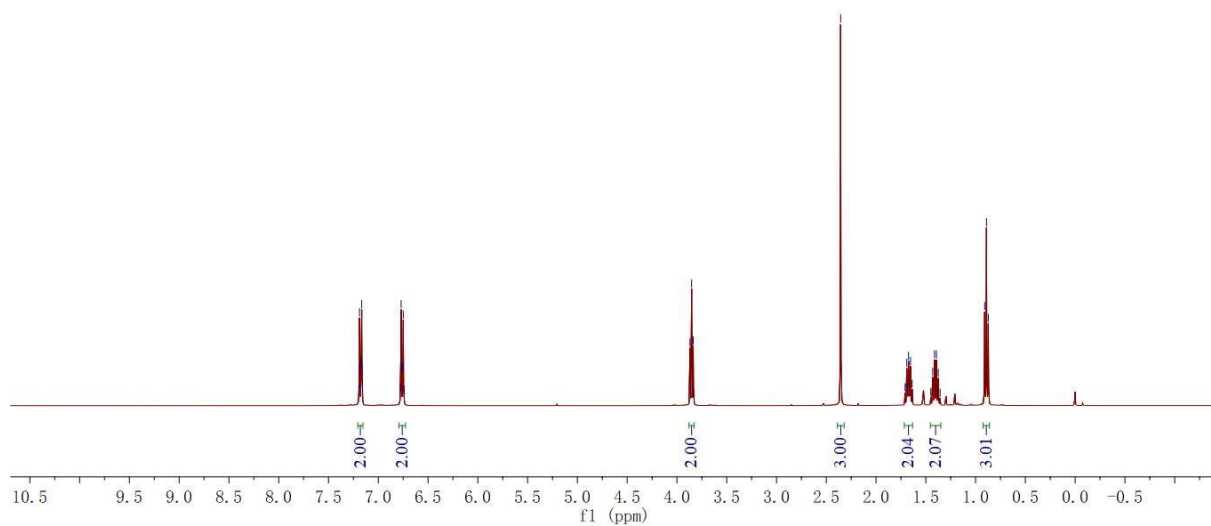

0630-yxt-322-b-c

157.86  
130.31  
128.53  
115.28  
77.44  
77.12  
76.80  
67.90  
31.37  
19.31  
18.21  
13.92

$^{13}\text{C}$  NMR (101 MHz,  $\text{CDCl}_3$ )

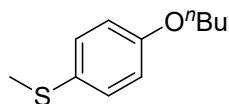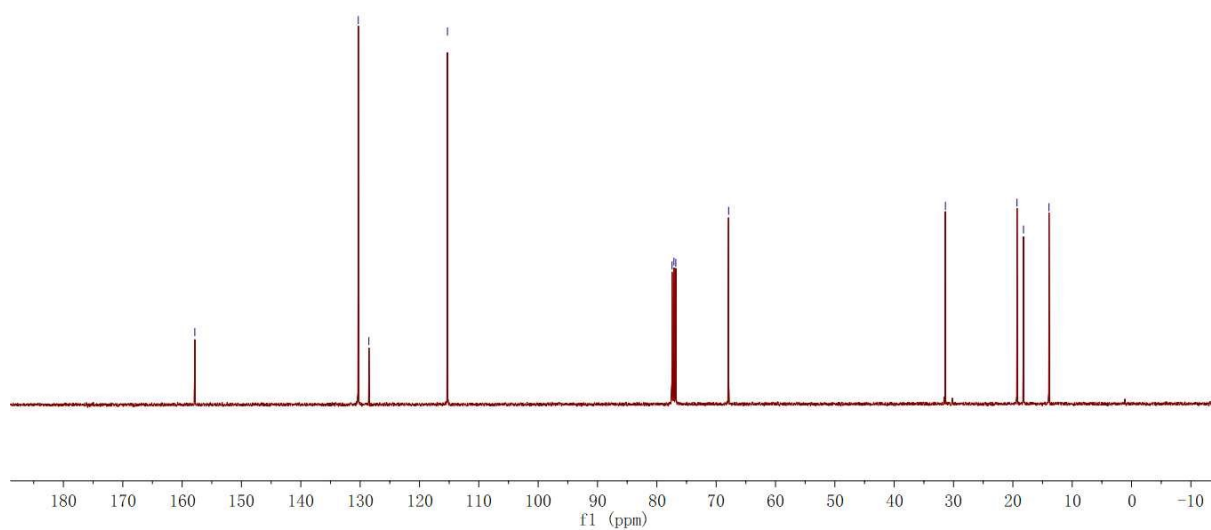

yxt-15a-DMSO

7.74  
7.72  
7.09  
7.07  
-4.04  
-3.34  
2.50  
2.50  
1.71  
1.69  
1.67  
1.42  
0.91  
0.90

<sup>1</sup>H NMR (400 MHz, DMSO)

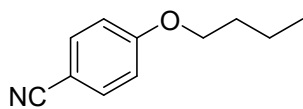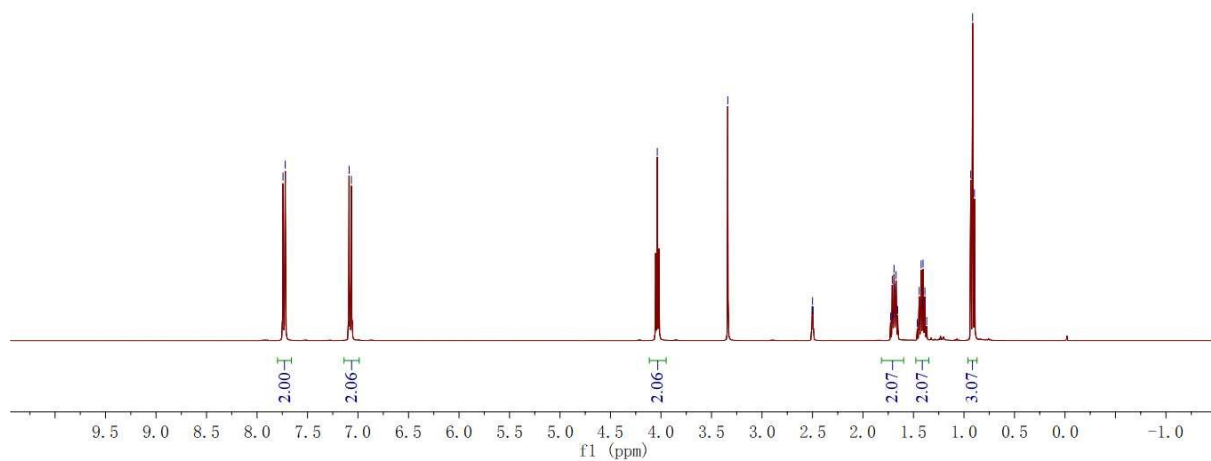

YXT-15A-C

-162.16  
-134.12  
-119.15  
-115.47  
-102.61  
-67.74  
39.94  
39.73  
39.52  
39.31  
39.10  
30.45  
-18.62  
-13.60

<sup>13</sup>C NMR (101 MHz, DMSO)

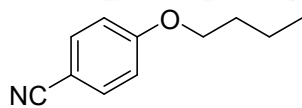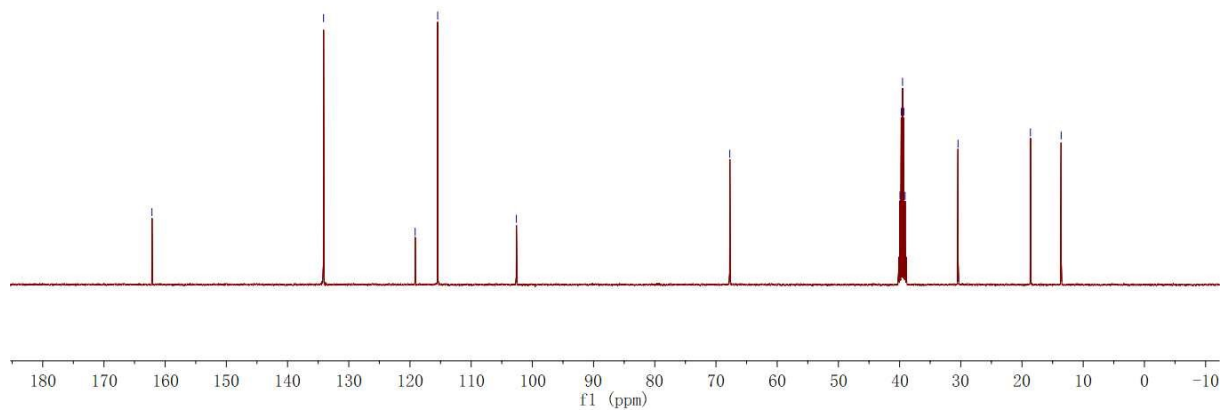

0630-yxt-322-c-h

7.54  
7.52  
7.26  
6.96  
6.94

4.02  
4.00  
3.98

1.81  
1.79  
1.78  
1.77  
1.75  
1.53  
1.52  
1.51  
1.50  
1.49  
1.48  
0.99  
0.97

$^1\text{H}$  NMR (400 MHz,  $\text{CDCl}_3$ )

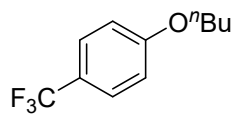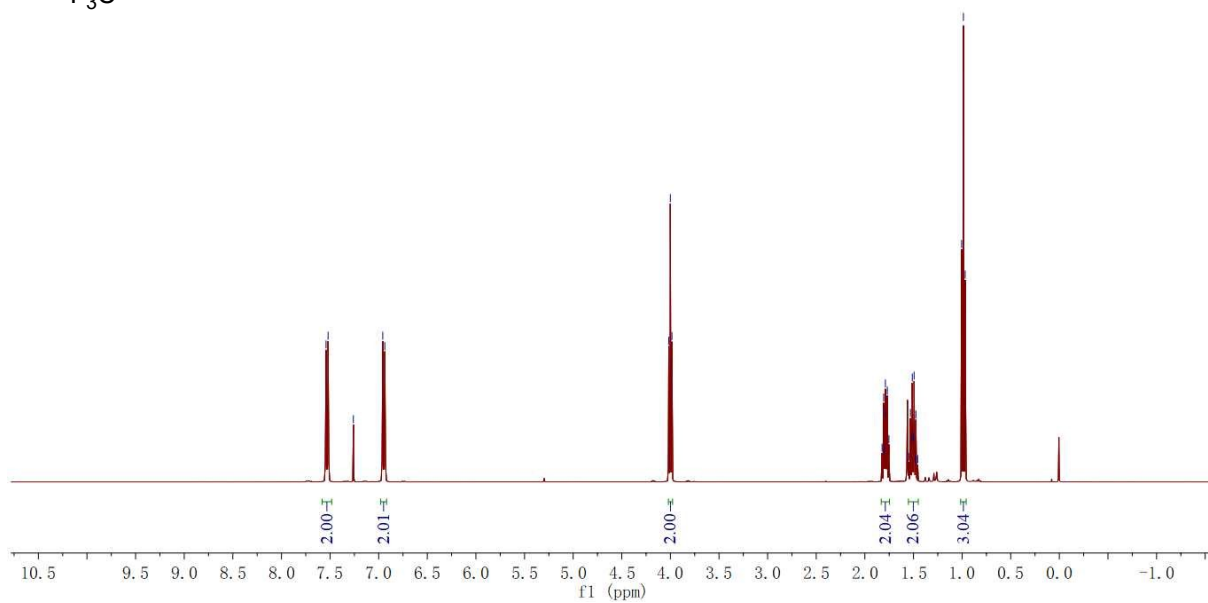

YXT-322C- $\text{CDCl}_3$ -F

-61.45

$^{19}\text{F}$  NMR (376 MHz,  $\text{CDCl}_3$ )

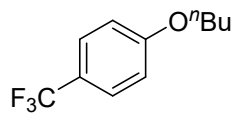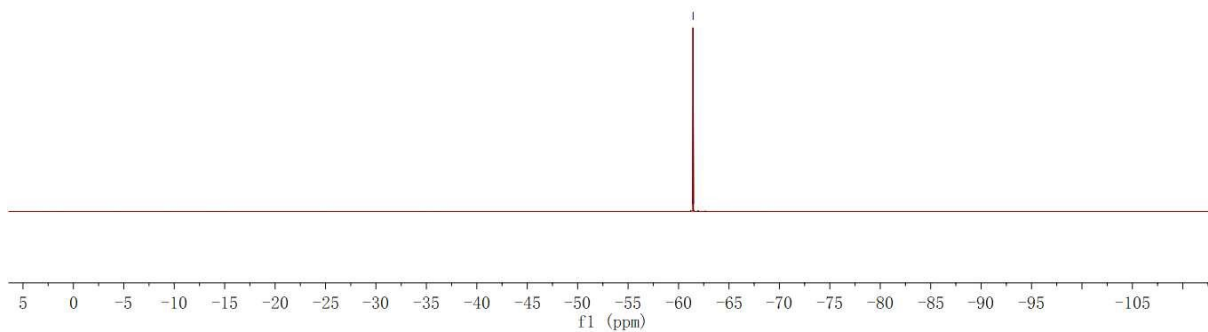

YXT-322C-CDCL3-C

161.77  
128.70  
127.03  
126.99  
126.95  
126.92  
126.01  
123.32  
123.22  
122.89  
122.57  
122.24  
120.63  
114.56  
77.48  
77.16  
76.84  
68.07  
31.28  
19.33  
13.94

<sup>13</sup>C NMR (101 MHz, CDCl<sub>3</sub>)

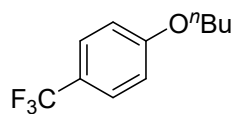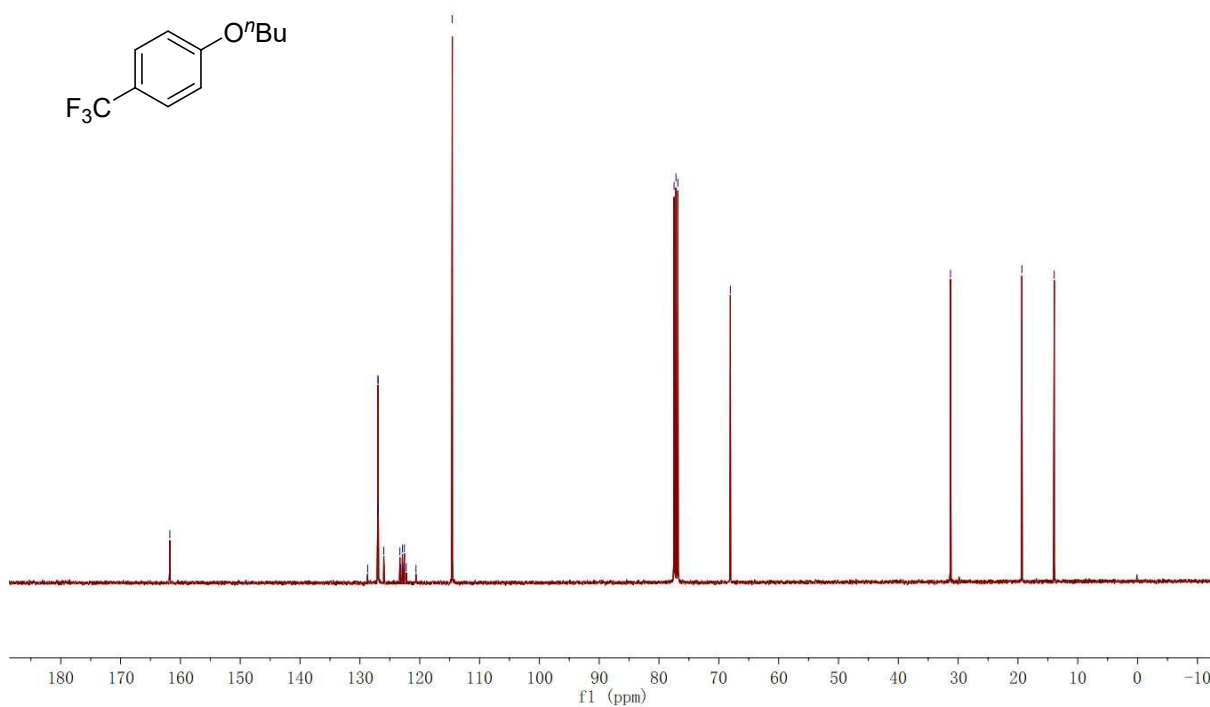

0630-yxt-322-e-h

7.26  
7.14  
7.12  
6.89  
6.88  
6.87  
6.86  
6.85  
3.96  
3.94  
3.93  
1.80  
1.78  
1.77  
1.75  
1.73  
1.54  
1.52  
1.50  
1.48  
1.06  
0.98  
0.96

<sup>1</sup>H NMR (400 MHz, CDCl<sub>3</sub>)

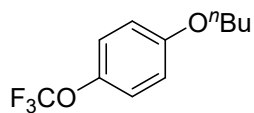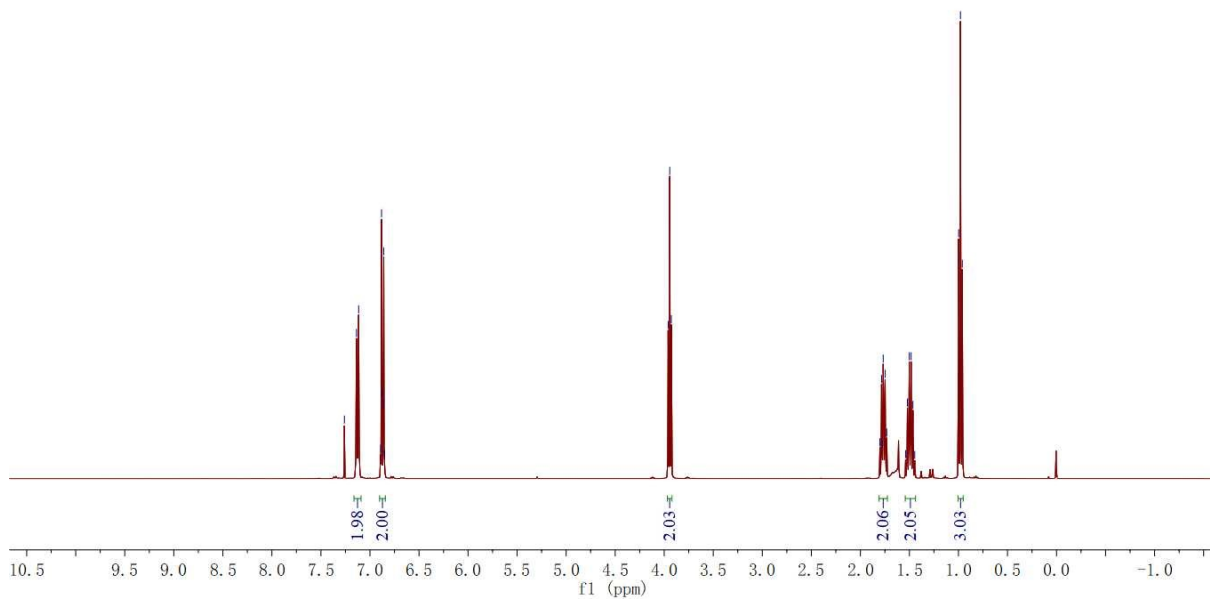

YXT-322E-CDCl<sub>3</sub>-F

—58.44

<sup>19</sup>F NMR (376 MHz, CDCl<sub>3</sub>)

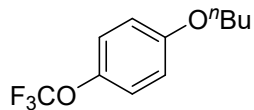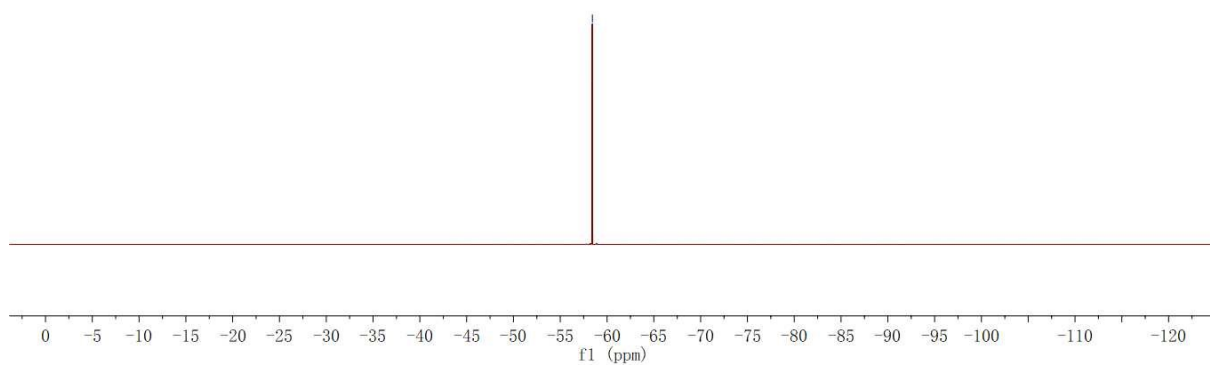

yxt-322e1-cdcl3

—157.83

—142.68  
—142.66

—124.55  
—122.49  
—122.01  
—119.47  
—116.92  
—113.30

—68.27

—31.37

—19.34

—13.93

<sup>13</sup>C NMR (101 MHz, CDCl<sub>3</sub>)

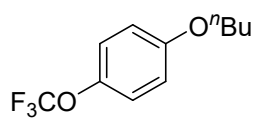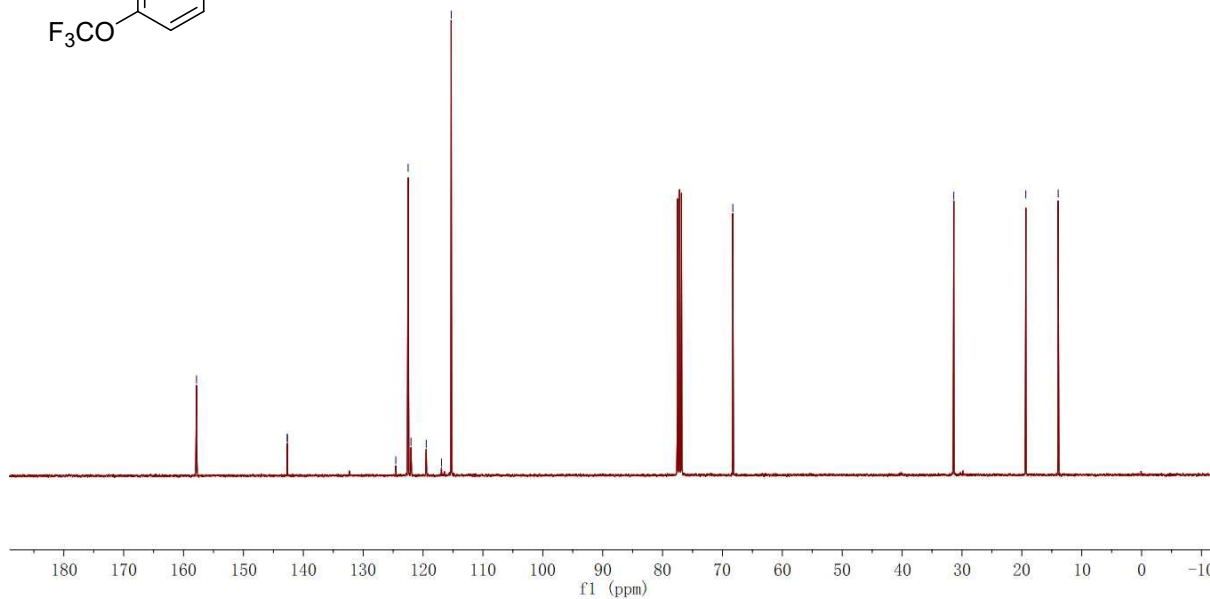

YXT-350A-CDCl<sub>3</sub>

<sup>1</sup>H NMR (400 MHz, CDCl<sub>3</sub>)

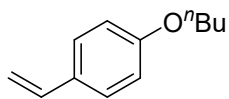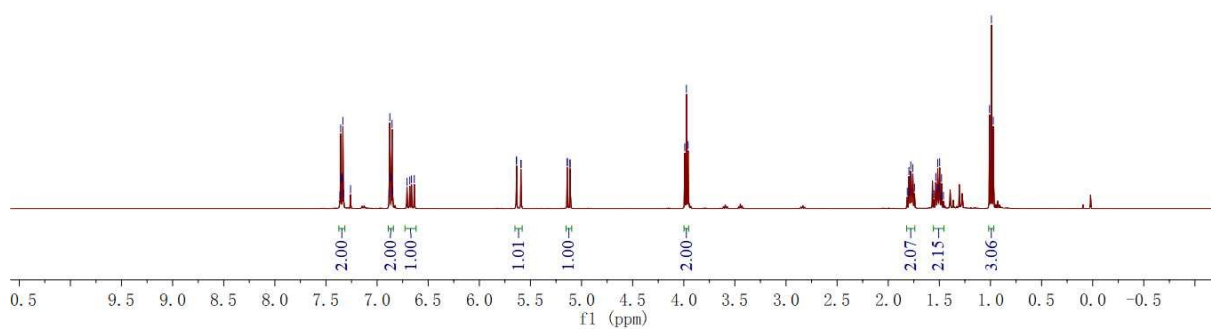

YXT-350A-CDCl<sub>3</sub>-C

<sup>13</sup>C NMR (101 MHz, CDCl<sub>3</sub>)

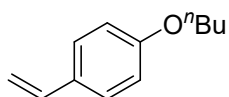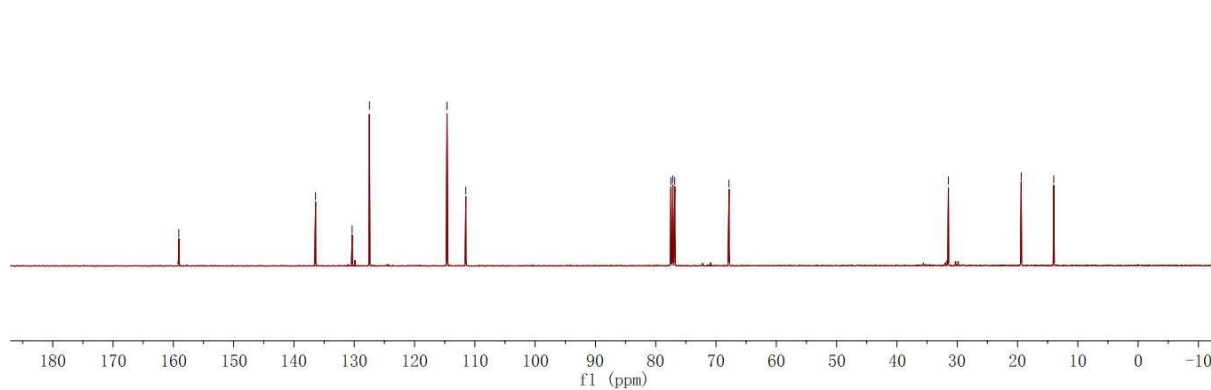

0521-yxt-267

7.79, 7.77, 7.76, 7.74, 7.73, 7.47, 7.46, 7.45, 7.44, 7.37, 7.36, 7.35, 7.33, 7.26, 7.19, 7.19, 7.16, 7.16, 4.12, 4.10, 4.09, 1.90, 1.88, 1.87, 1.84, 1.83, 1.62, 1.60, 1.58, 1.56, 1.54, 1.52, 1.05, 1.04

$^1\text{H}$  NMR (400 MHz,  $\text{CDCl}_3$ )

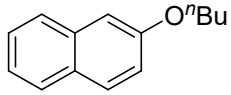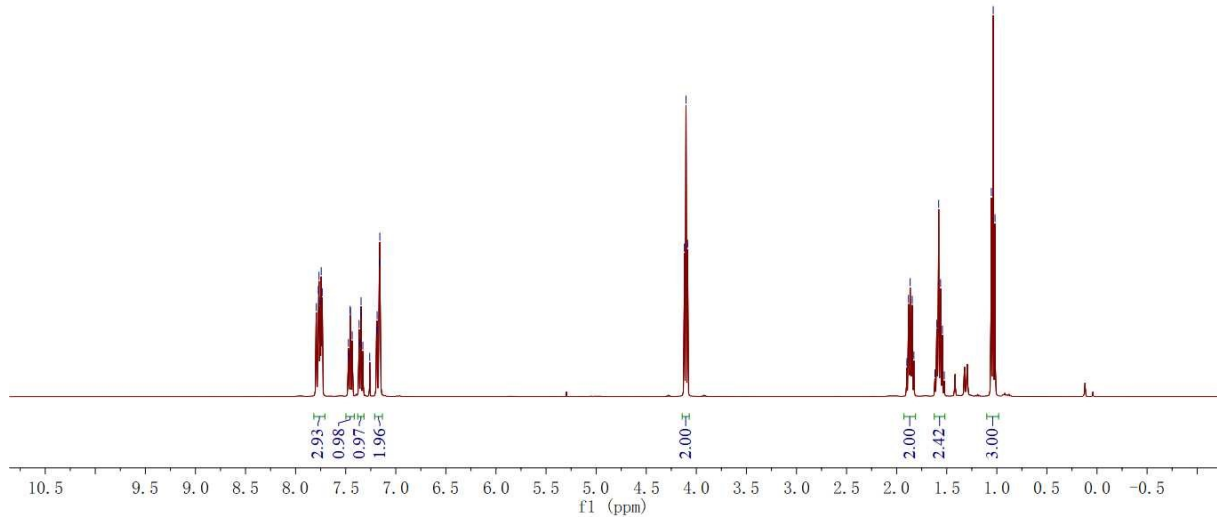

YXT-267C1- $\text{CDCl}_3$ -C

157.26, 134.77, 129.43, 129.01, 127.76, 126.82, 126.40, 123.57, 119.17, 106.67, 77.48, 77.16, 76.84, 67.83, 31.45, 19.46, 14.03

$^{13}\text{C}$  NMR (101 MHz,  $\text{CDCl}_3$ )

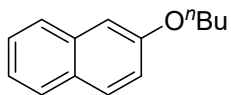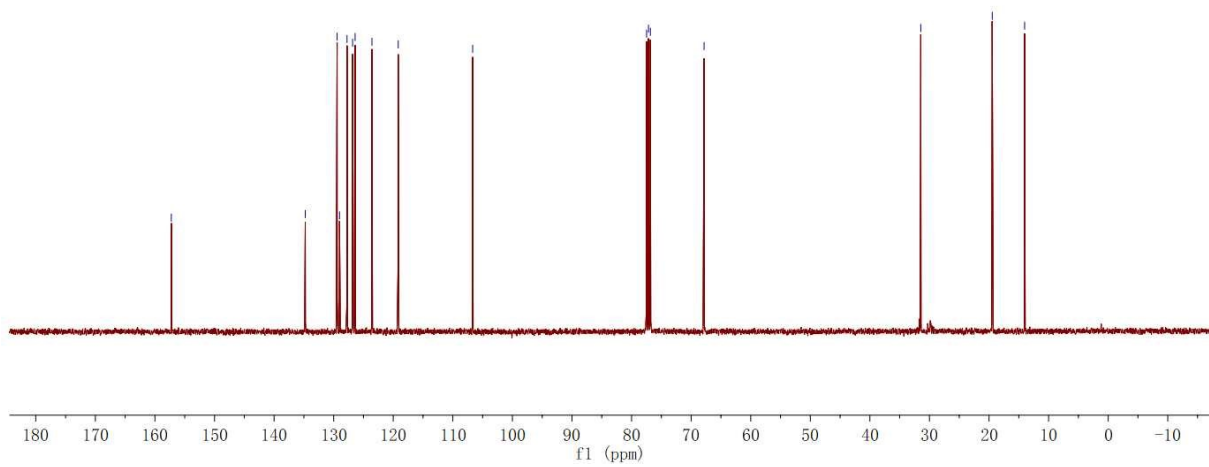

YXT-325C-CDCl<sub>3</sub>

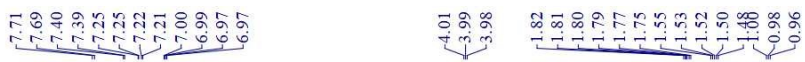

<sup>1</sup>H NMR (400 MHz, CDCl<sub>3</sub>)

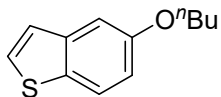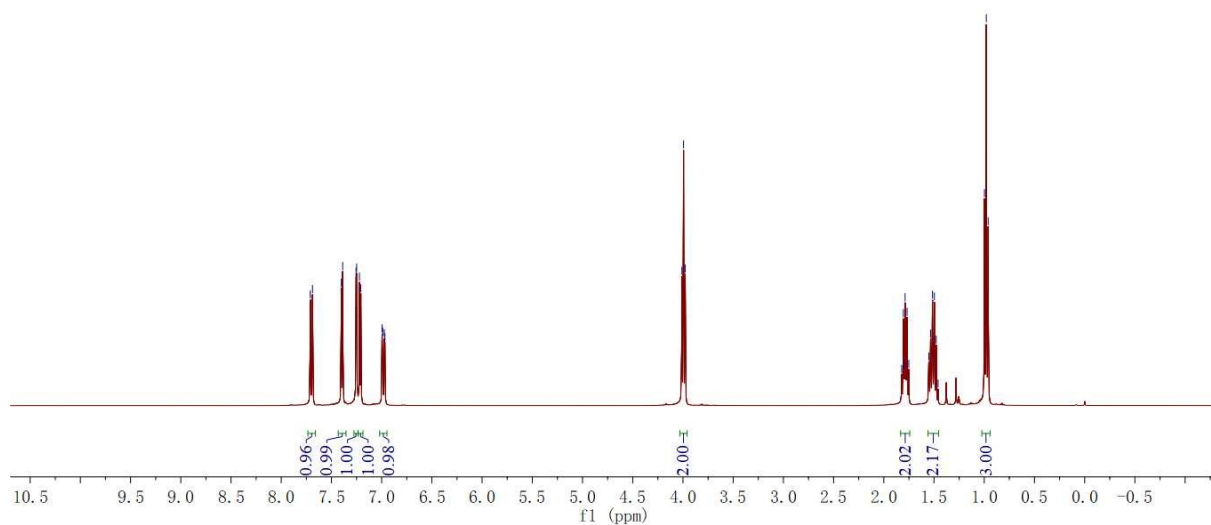

YXT-325C-CDCl<sub>3</sub>-C

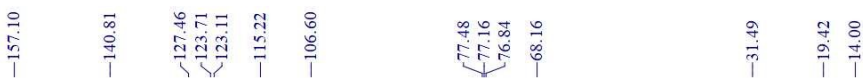

<sup>13</sup>C NMR (101 MHz, CDCl<sub>3</sub>)

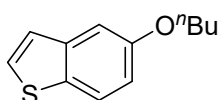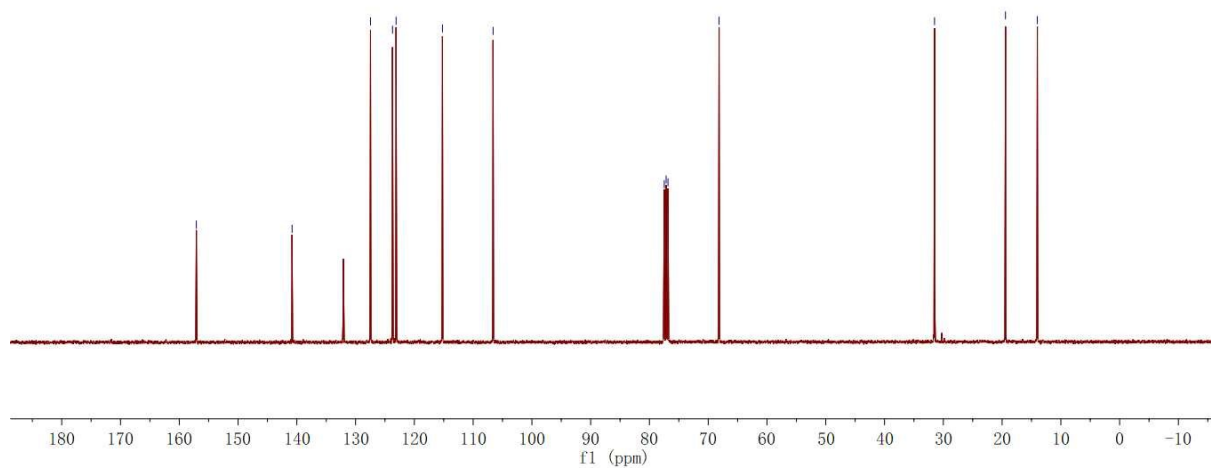



YXT-314C-CDCl<sub>3</sub>

8.27, 8.27, 8.17, 8.16, 8.16, 8.15, 7.26, 7.19, 7.18, 7.18, 7.17, 7.17, 7.16, 7.16, 7.15, 7.15, 7.14, 7.14, 7.13, 7.13, 3.98, 3.97, 3.95, 1.78, 1.77, 1.75, 1.75, 1.73, 1.73, 1.71, 1.71, 1.50, 1.48, 1.46, 0.94, 0.94, 0.95, 0.93

<sup>1</sup>H NMR (400 MHz, CDCl<sub>3</sub>)

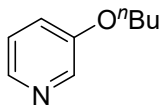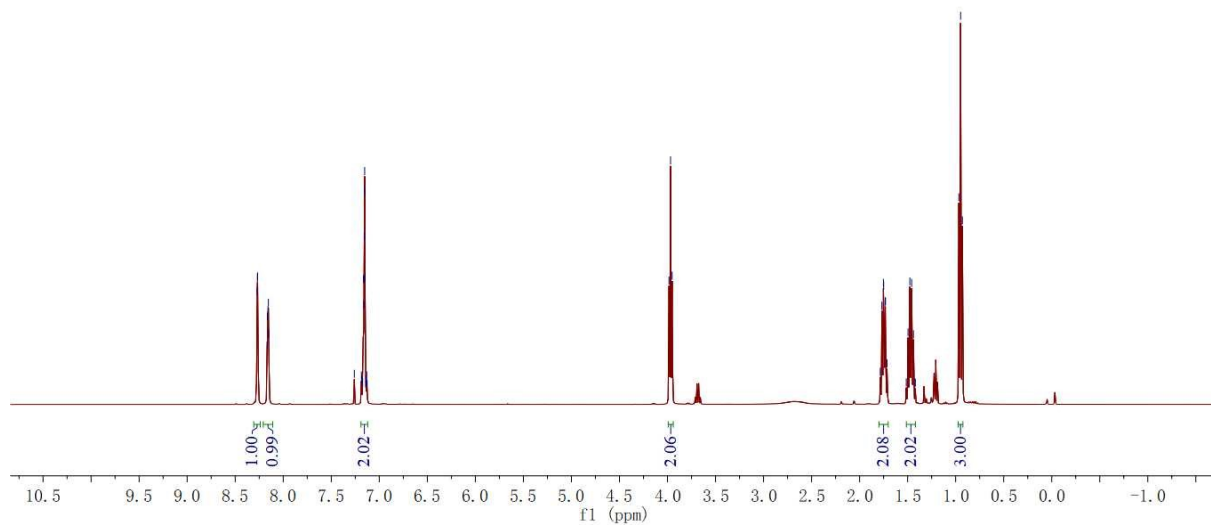

YXT-314C-CDCl<sub>3</sub>-C

155.35, 141.88, 138.06, 123.86, 121.12, 77.48, 77.16, 76.84, 68.07, 31.24, 19.21, 13.85

<sup>13</sup>C NMR (101 MHz, CDCl<sub>3</sub>)

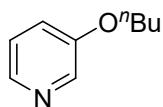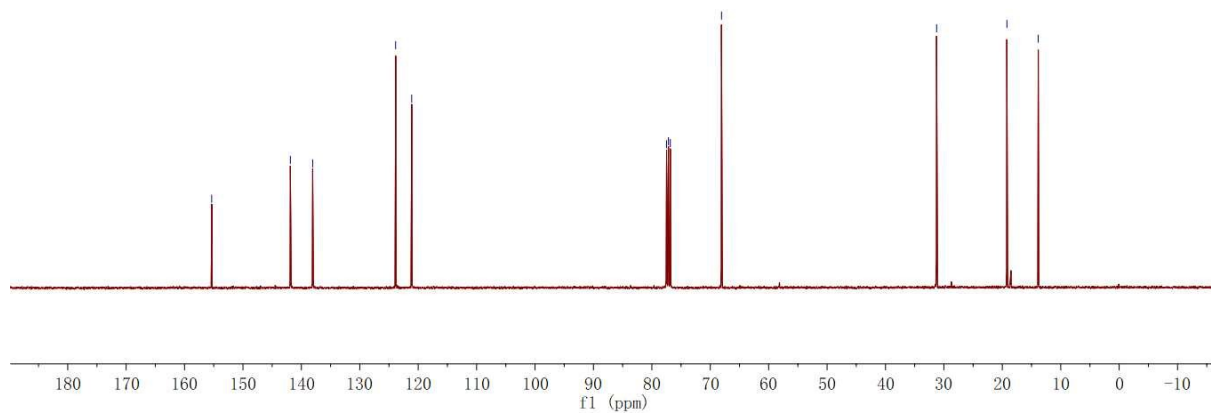

YXT-325A-CDCl3

8.67, 8.66, 8.04, 8.02, 7.70, 7.70, 7.68, 7.68, 7.55, 7.55, 7.53, 7.53, 7.51, 7.51, 7.51, 7.50, 7.49, 7.48, 7.46, 7.46, 7.34, 7.34, 7.26, 7.26, 1.88, 1.86, 1.85, 1.84, 1.82, 1.81, 1.59, 1.57, 1.55, 1.53, 1.51, 1.49, 1.02, 1.00, 0.98

$^1\text{H}$  NMR (400 MHz,  $\text{CDCl}_3$ )

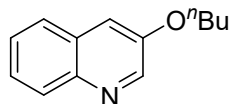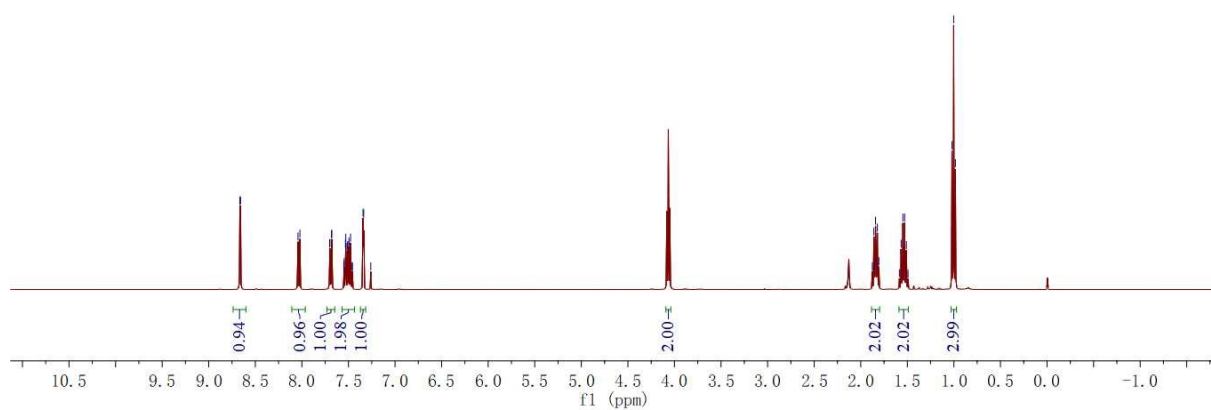

YXT-325A-CDCl3-C

152.70, 144.95, 143.48, 129.22, 128.98, 127.08, 126.73, 126.61, 112.96, 77.48, 77.16, 76.84, 68.13, 31.17, 19.33, 13.93

$^{13}\text{C}$  NMR (101 MHz,  $\text{CDCl}_3$ )

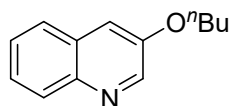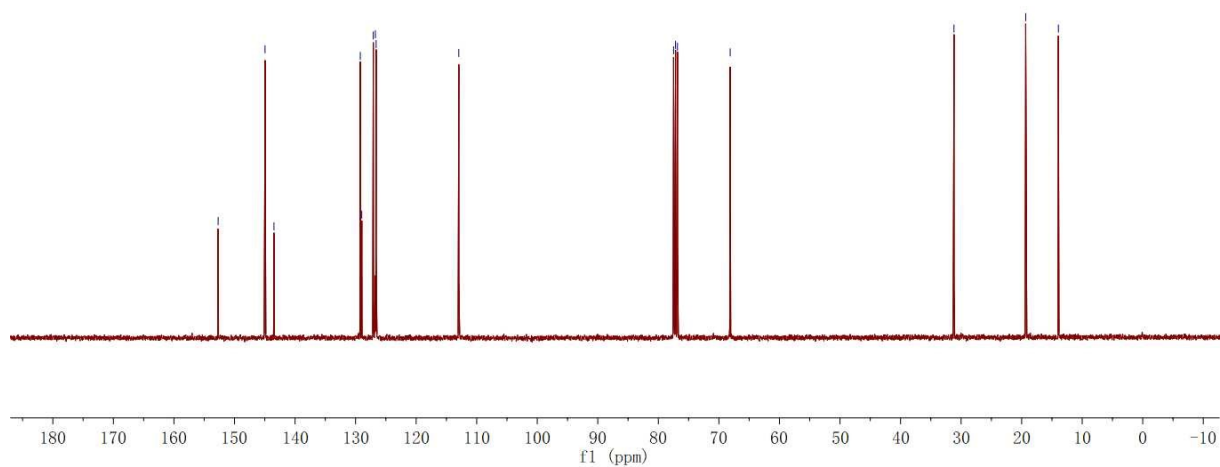

YXT-306C-CDCl<sub>3</sub>-H

8.00  
7.99  
7.99  
7.97  
7.97  
7.96  
7.26  
6.91  
6.90  
6.90  
6.88  
6.88  
6.87  
4.36  
4.35  
4.33  
4.31  
4.10  
4.08  
4.07  
4.05  
1.44  
1.43  
1.41  
1.39  
1.37  
1.35

<sup>1</sup>H NMR (400 MHz, CDCl<sub>3</sub>)

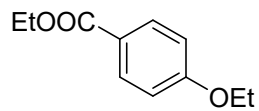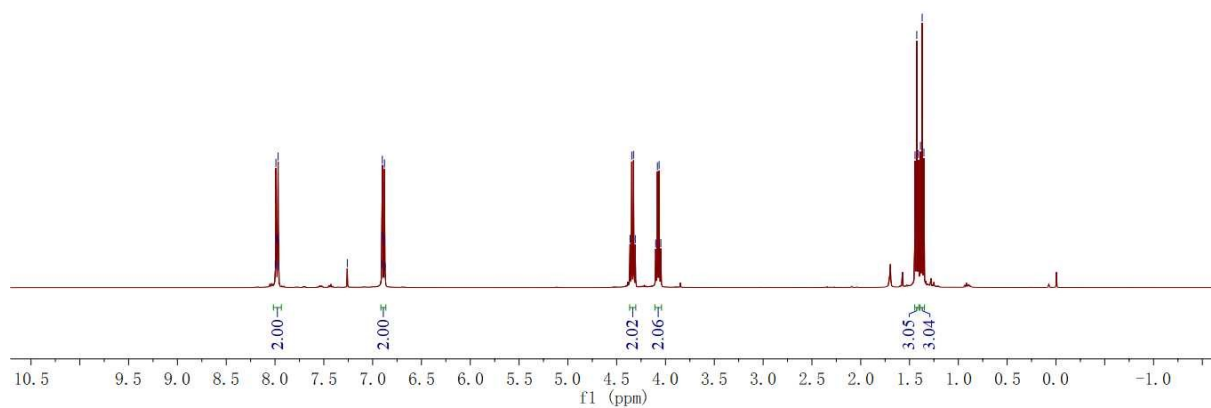

YXT-306C-CDCl<sub>3</sub>-C

166.56  
162.79  
131.64  
122.85  
114.10  
77.48  
77.16  
76.84  
63.77  
60.72  
14.80  
14.50

<sup>13</sup>C NMR (101 MHz, CDCl<sub>3</sub>)

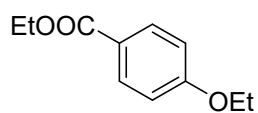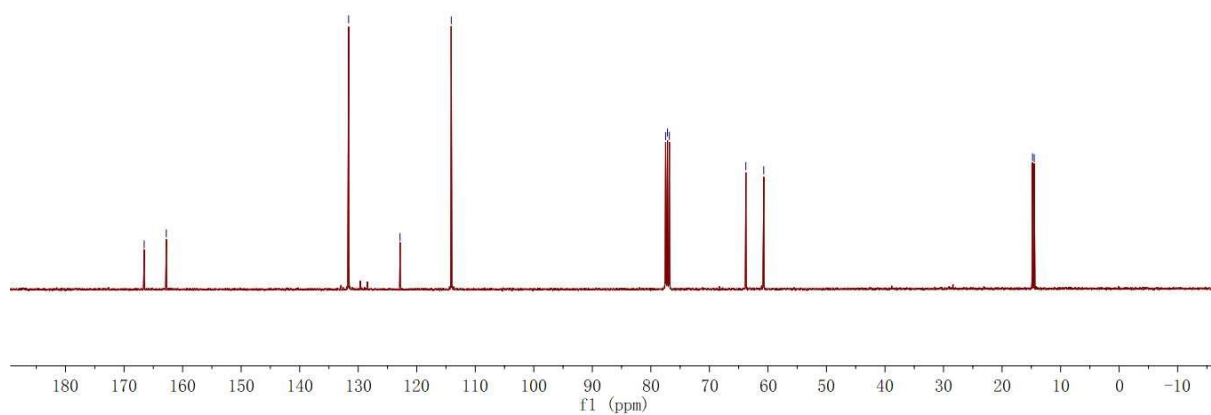

YXT-294A-CDCl3

-7.26  
-6.85

-3.78

$^1\text{H}$  NMR (400 MHz,  $\text{CDCl}_3$ )

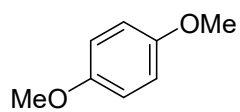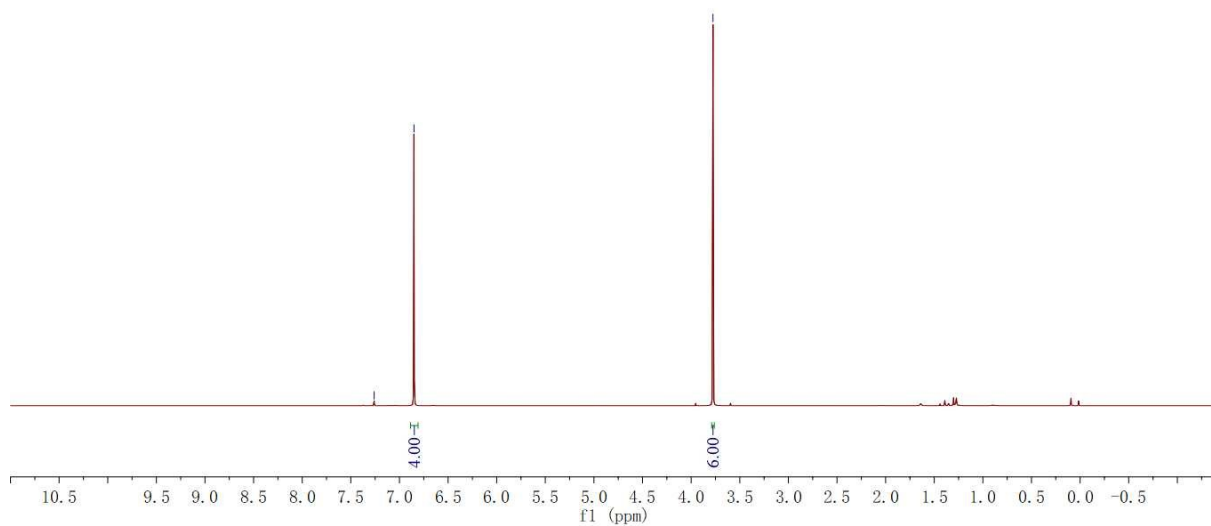

YXT-294A-CDCl3-C

-153.90

-114.78

-77.48  
-77.16  
-76.84

-55.85

$^{13}\text{C}$  NMR (101 MHz,  $\text{CDCl}_3$ )

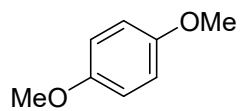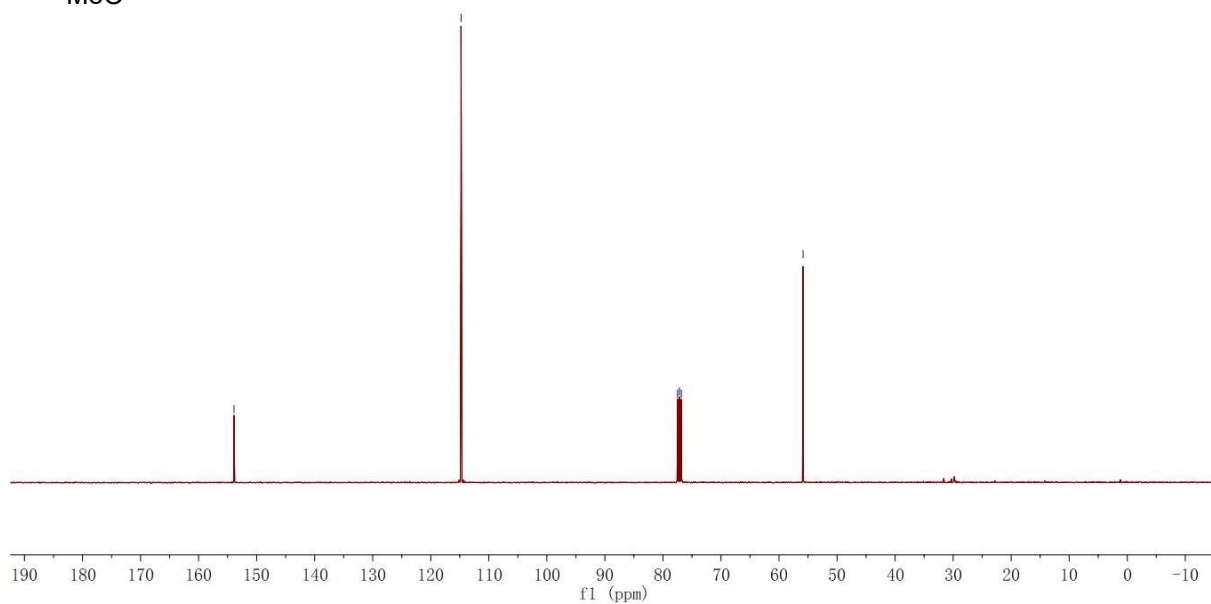

YXT-386E-CDCL3

-7.26  
-6.84

-3.77

$^1\text{H}$  NMR (400 MHz,  $\text{CDCl}_3$ )

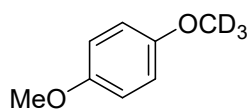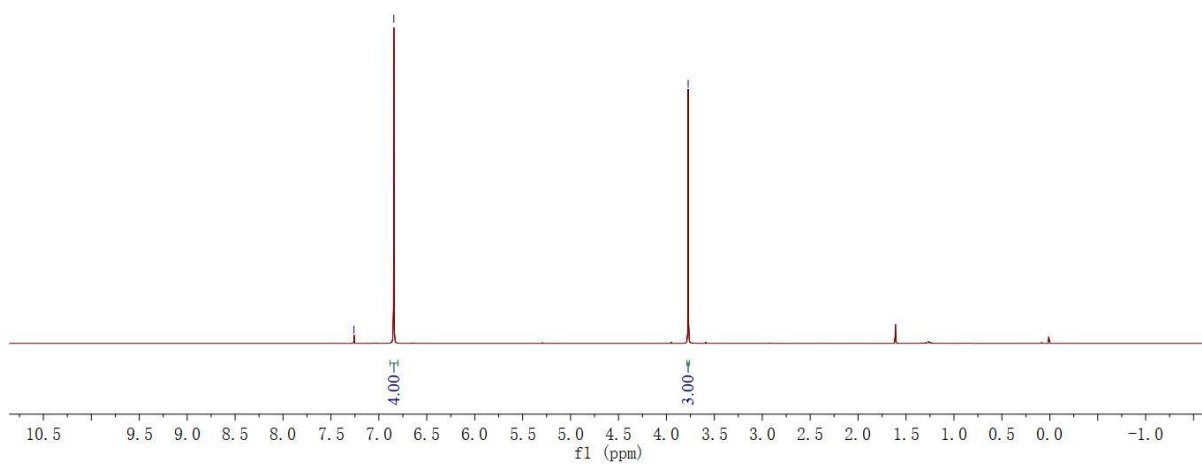

YXT-386E-CDCL3-C

-153.90

-114.80  
-114.78

-77.48  
-77.16  
-76.84

-55.88

$^{13}\text{C}$  NMR (101 MHz,  $\text{CDCl}_3$ )

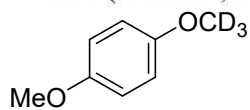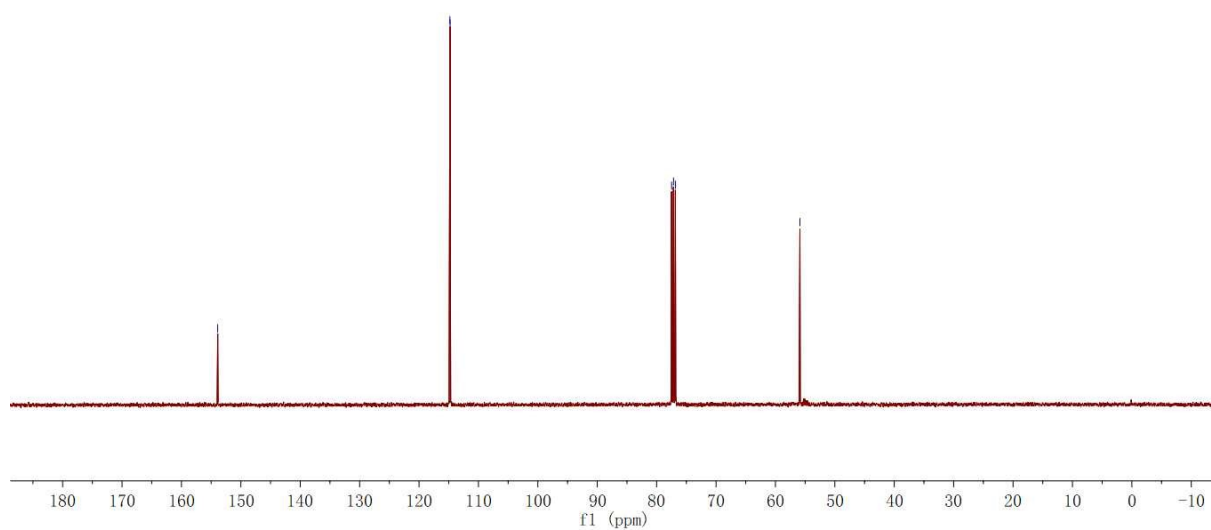

YXT-261B

7.45  
7.43  
7.41  
7.39  
7.37  
7.35  
7.33  
7.31  
7.26  
6.94  
6.94  
6.93  
6.92  
6.91  
6.87  
6.86  
6.85  
6.84  
6.84  
6.83  
5.03  
-3.78

$^1\text{H}$  NMR (400 MHz,  $\text{CDCl}_3$ )

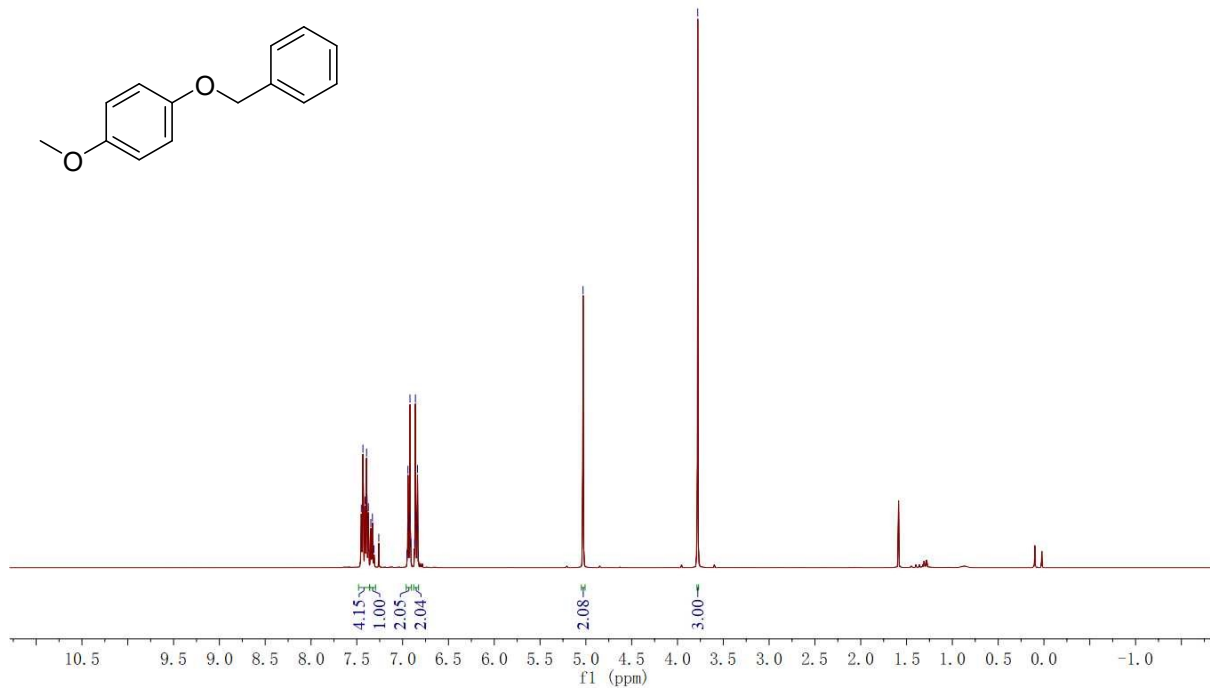

YXT-261B-C

154.12  
153.10  
137.45  
128.67  
128.00  
127.60  
116.00  
114.79  
77.48  
77.16  
76.84  
70.86  
55.85

$^{13}\text{C}$  NMR (101 MHz,  $\text{CDCl}_3$ )

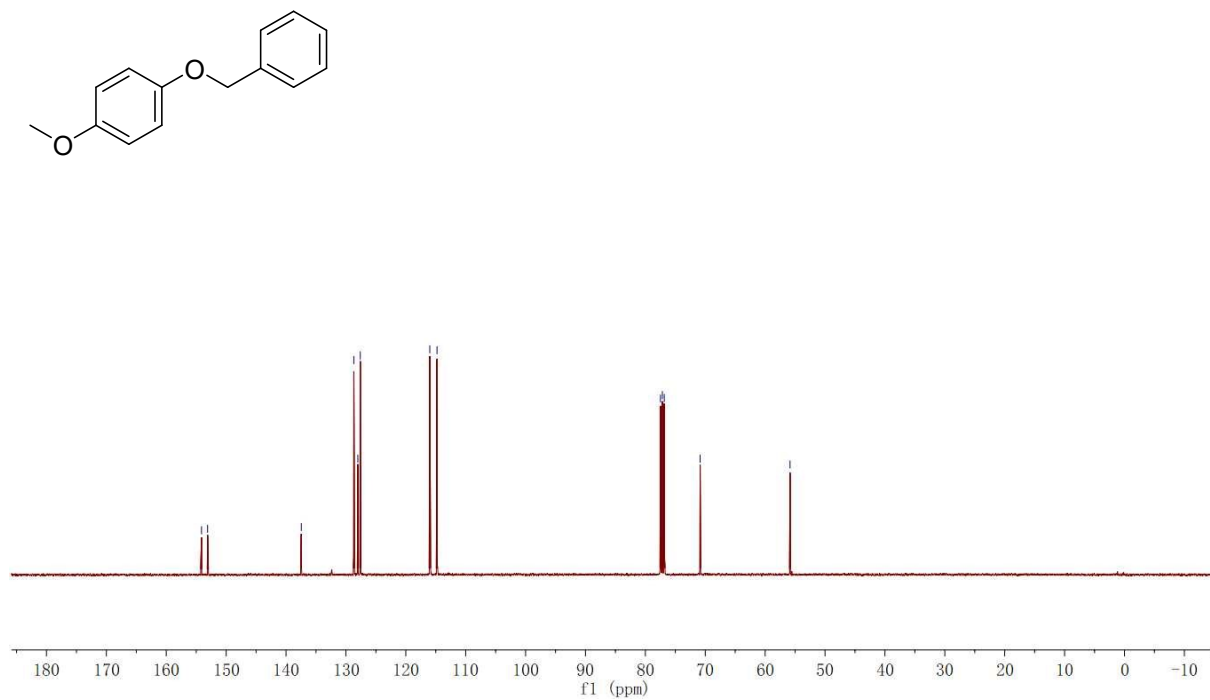

0723-338E-H

7.49  
7.48  
7.44  
7.42  
7.40  
7.37  
7.35  
7.33  
7.26  
7.21  
7.20  
7.19  
7.18  
7.16  
6.93  
6.90  
-5.12

-2.33

$^1\text{H NMR}$  (400 MHz,  $\text{CDCl}_3$ )

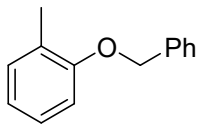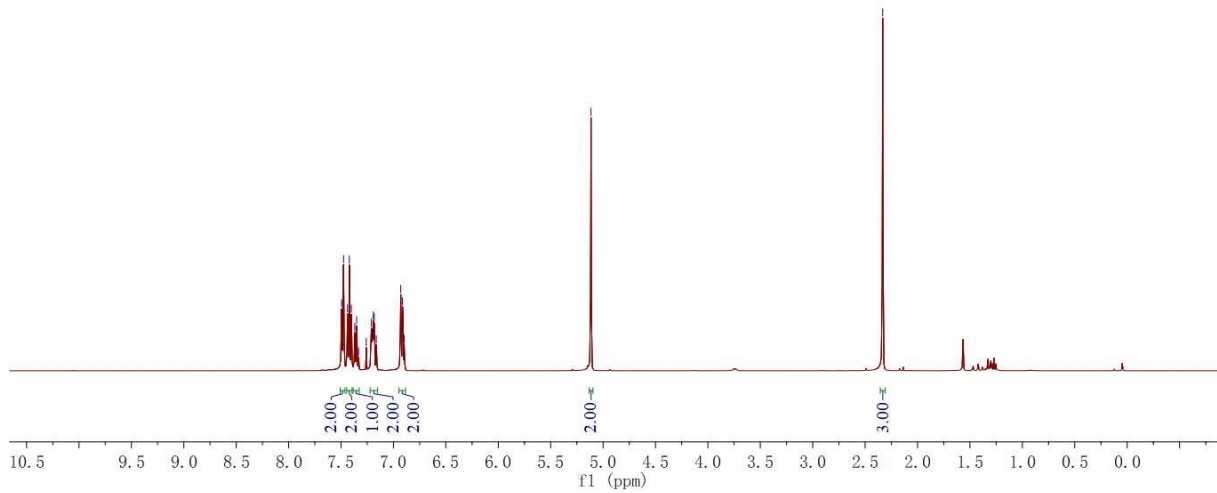

0723-338E-C

157.02  
137.65  
130.86  
128.63  
127.85  
127.23  
126.89  
120.73  
111.57

77.48  
77.16  
76.84  
69.93

16.53

$^{13}\text{C NMR}$  (101 MHz,  $\text{CDCl}_3$ )

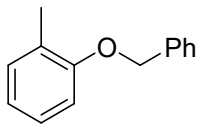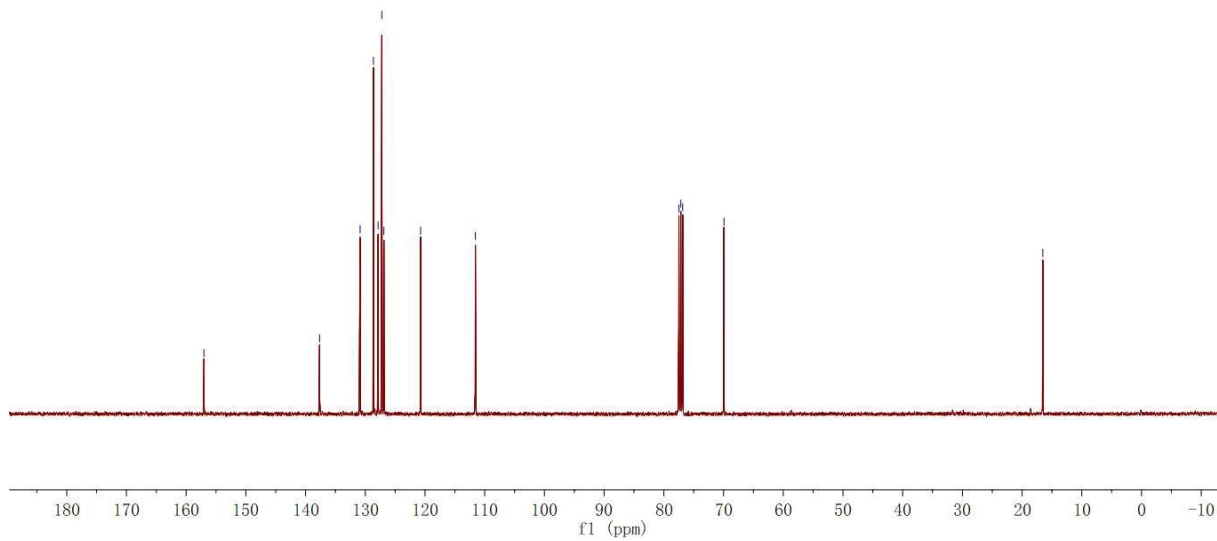

YXT-397CP2-CDCl3

7.40  
7.38  
7.36  
7.35  
7.34  
7.34  
7.32  
7.31  
7.31  
7.29  
7.28  
7.26  
7.23  
7.21  
7.19  
6.83  
6.81  
6.79  
6.76  
4.23  
4.21  
4.20  
-2.38

<sup>1</sup>H NMR (400 MHz, CDCl<sub>3</sub>)

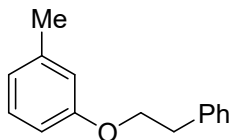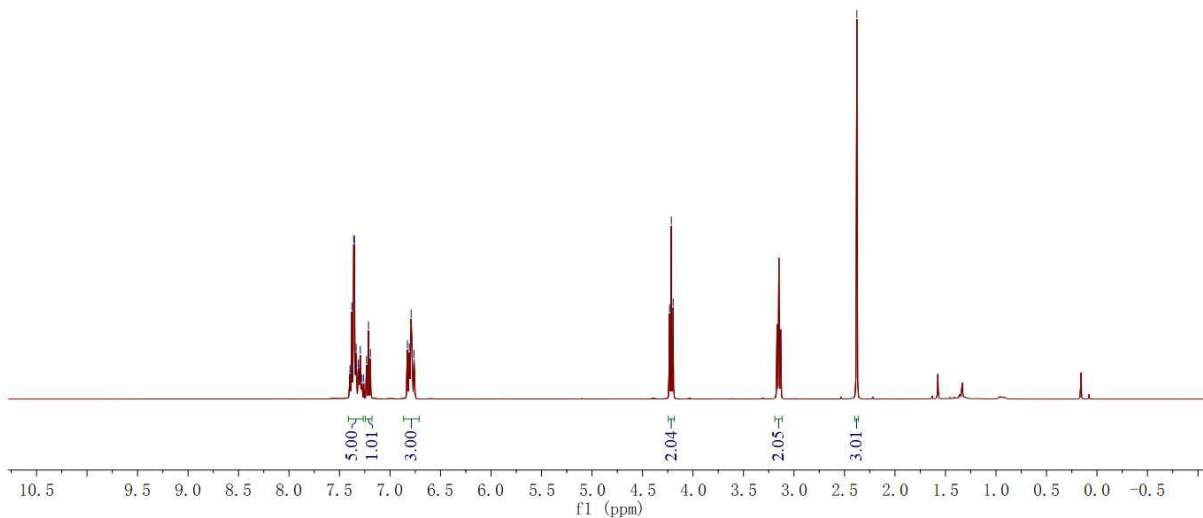

YXT-397C-CDCl3

158.94  
139.57  
138.45  
129.30  
129.12  
128.59  
126.57  
121.67  
115.55  
111.53  
77.48  
77.16  
76.84  
68.64  
35.97  
21.63

<sup>13</sup>C NMR (101 MHz, CDCl<sub>3</sub>)

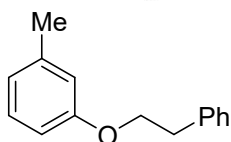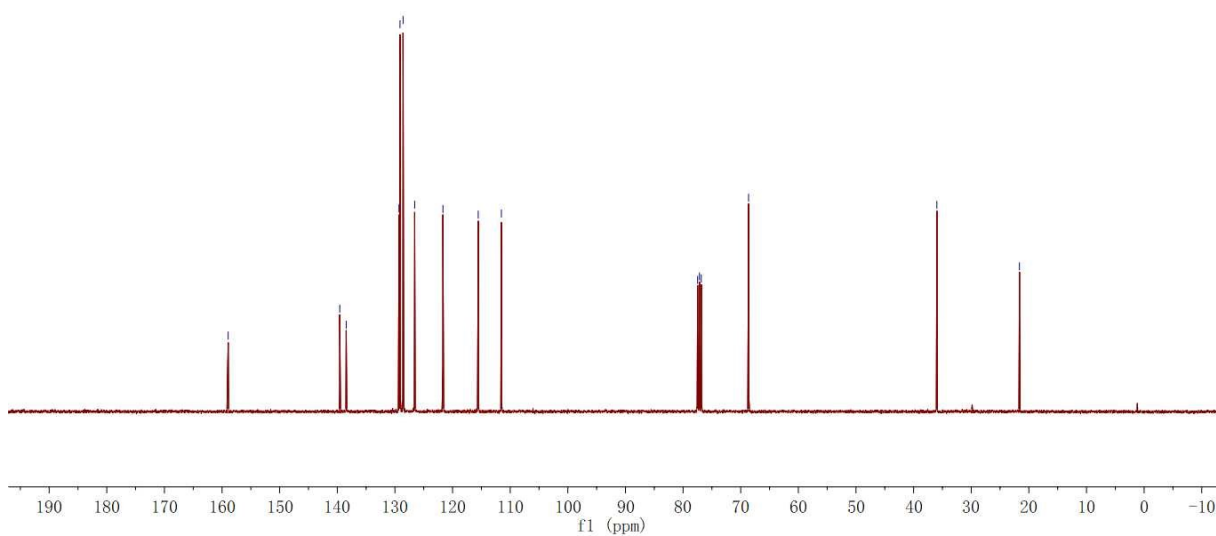



YXT-320B-CDCL3

7.26  
6.86  
6.86  
6.84  
6.83  
6.78  
6.76  
6.75  
6.74

-3.46

-2.86

2.02  
1.75  
1.73  
1.70  
1.67  
1.66

$^1\text{H}$  NMR (400 MHz,  $\text{CDCl}_3$ )

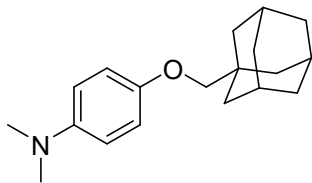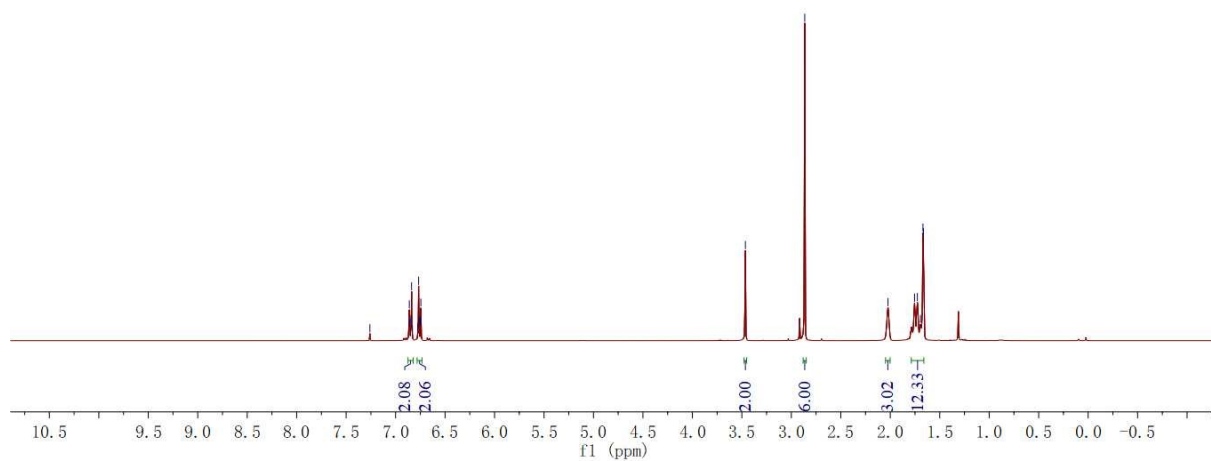

yxt-320bc-cdc13

-152.53

-145.62

-115.53

-115.23

-79.30

-77.48

-77.16

-76.84

-42.13

-39.67

-37.32

-34.00

-28.39

$^{13}\text{C}$  NMR (101 MHz,  $\text{CDCl}_3$ )

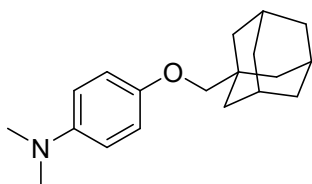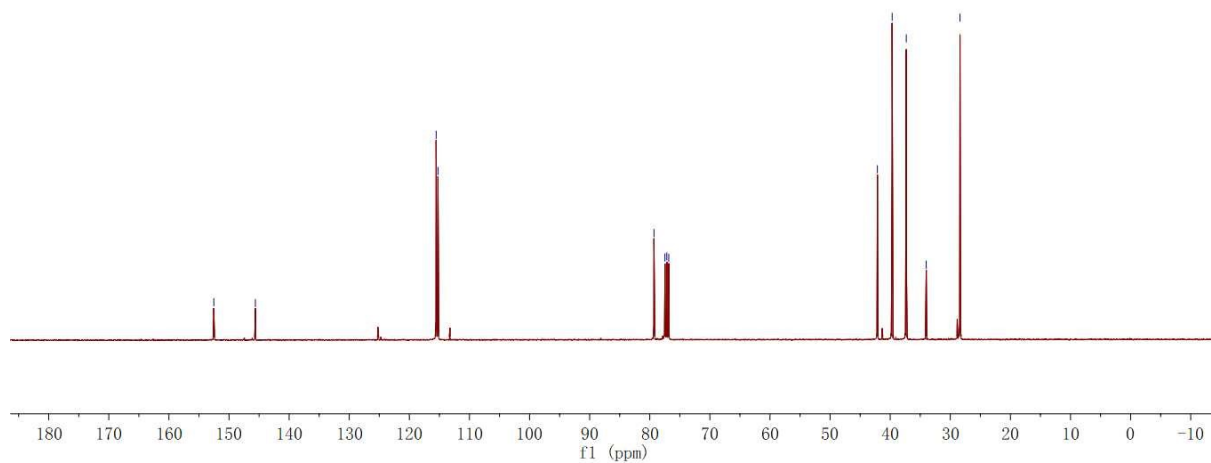

YXT-400E2-CDCL3

7.26, 6.82, 6.81, 4.86, 4.85, 4.84, 4.84, 4.83, 4.82, 3.99, 3.99, 3.96, 3.95, 3.88, 3.76, 2.18, 2.17, 2.17, 2.16, 2.15, 2.15, 2.14, 2.14, 2.13, 2.12, 2.11, 2.10

$^1\text{H}$  NMR (400 MHz,  $\text{CDCl}_3$ )

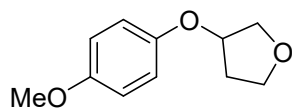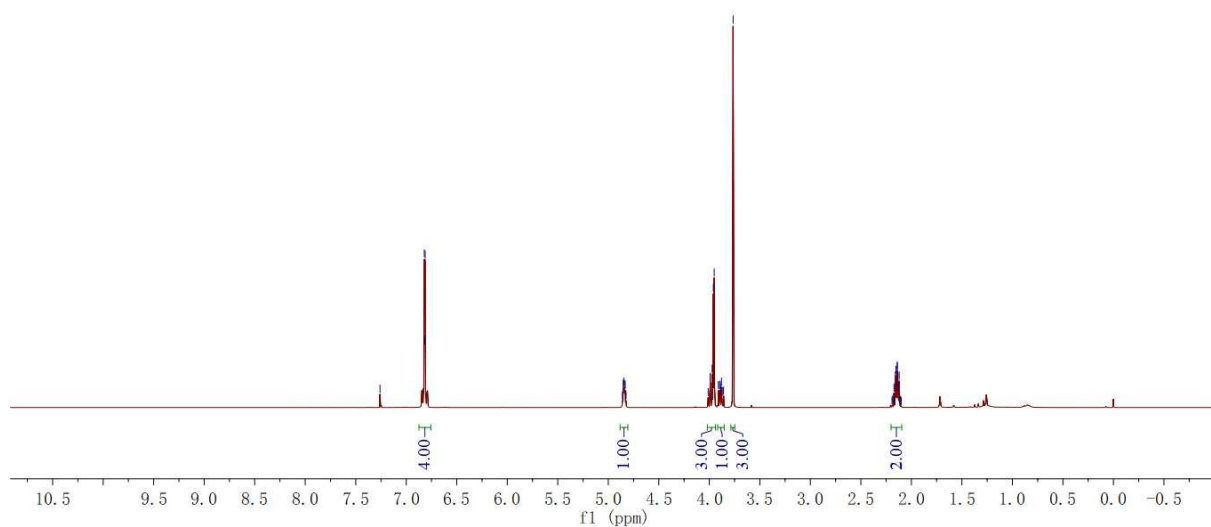

YXT-400E-CDCL3-C

154.13, 151.51, 116.61, 114.82, 78.04, 77.48, 77.16, 76.84, 73.17, 67.26, 55.77, 33.04

$^{13}\text{C}$  NMR (101 MHz,  $\text{CDCl}_3$ )

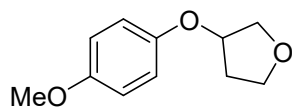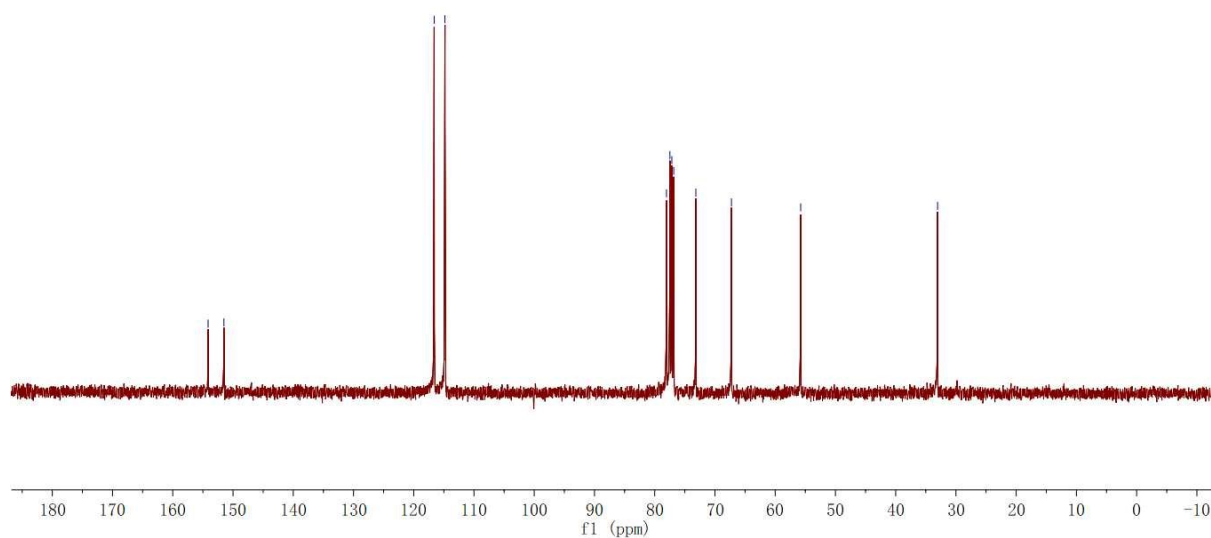

YXT-338F2-CDCl<sub>3</sub>

<sup>1</sup>H NMR (400 MHz, CDCl<sub>3</sub>)

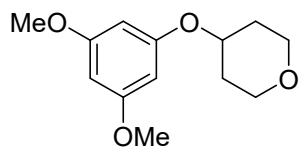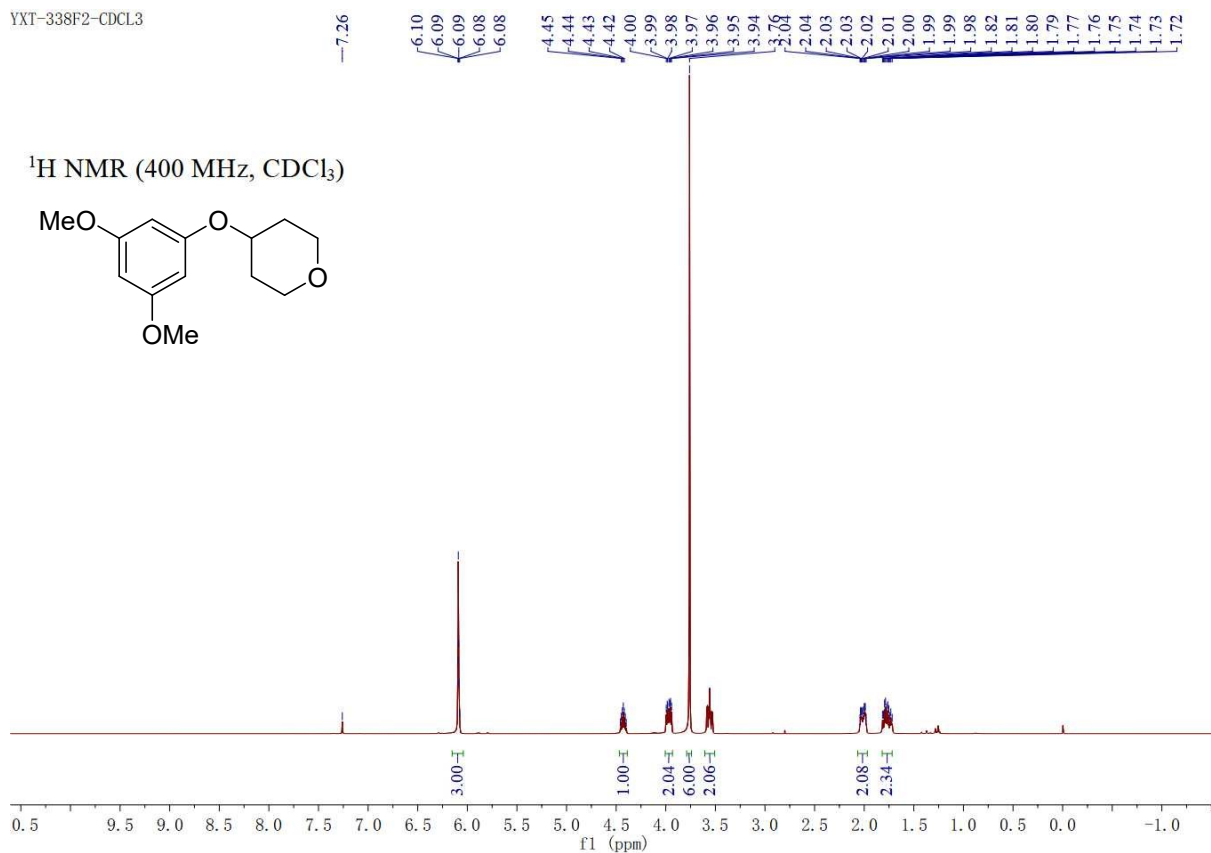

0723-YXT-338-F2-C

<sup>13</sup>C NMR (101 MHz, CDCl<sub>3</sub>)

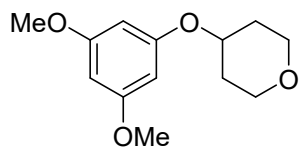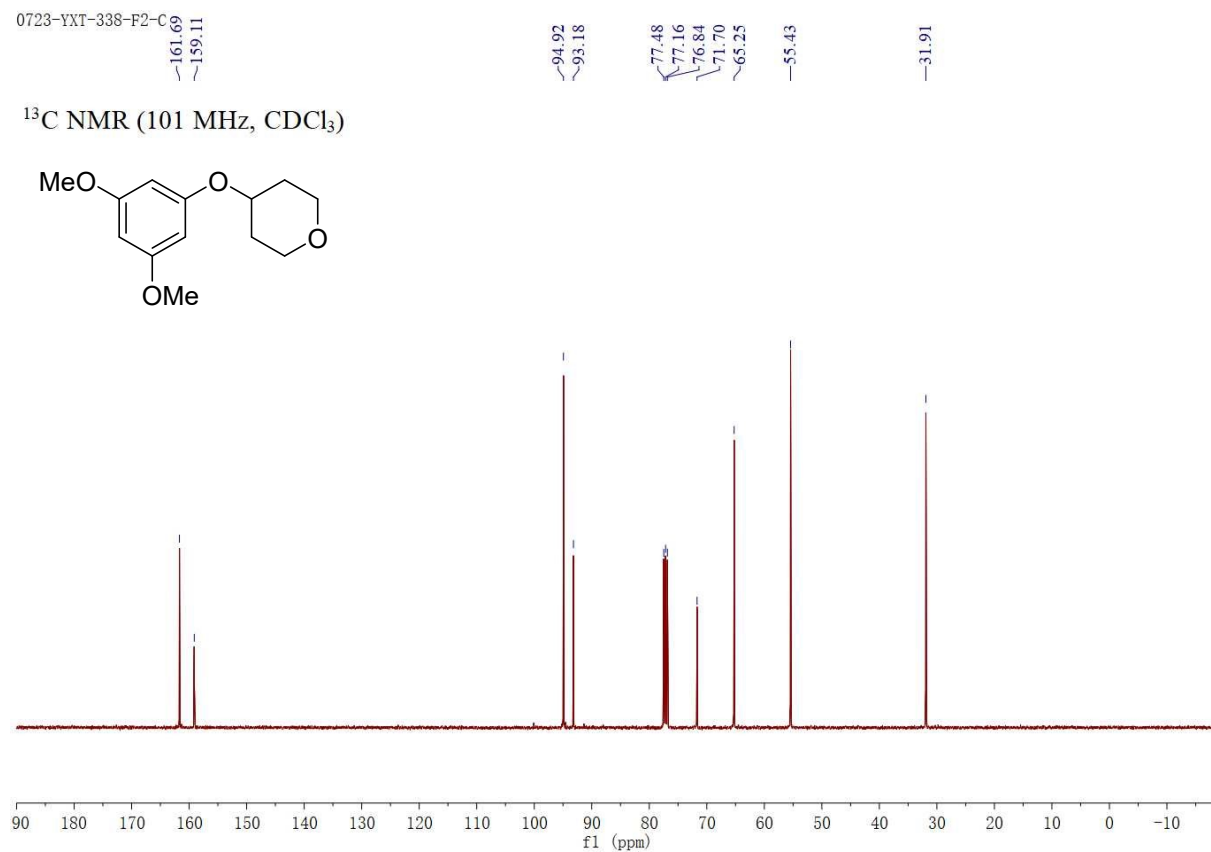

YXT-362E1-CDCl<sub>3</sub>

8.74  
8.73  
8.72  
8.01  
7.99  
7.98  
7.36  
7.34  
7.33  
7.33  
7.31  
7.29  
7.26  
7.06  
7.05  
4.17  
4.15  
4.14  
3.59  
3.58  
3.56  
3.35  
2.13  
2.12  
2.10  
2.09  
2.07

<sup>1</sup>H NMR (400 MHz, CDCl<sub>3</sub>)

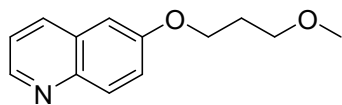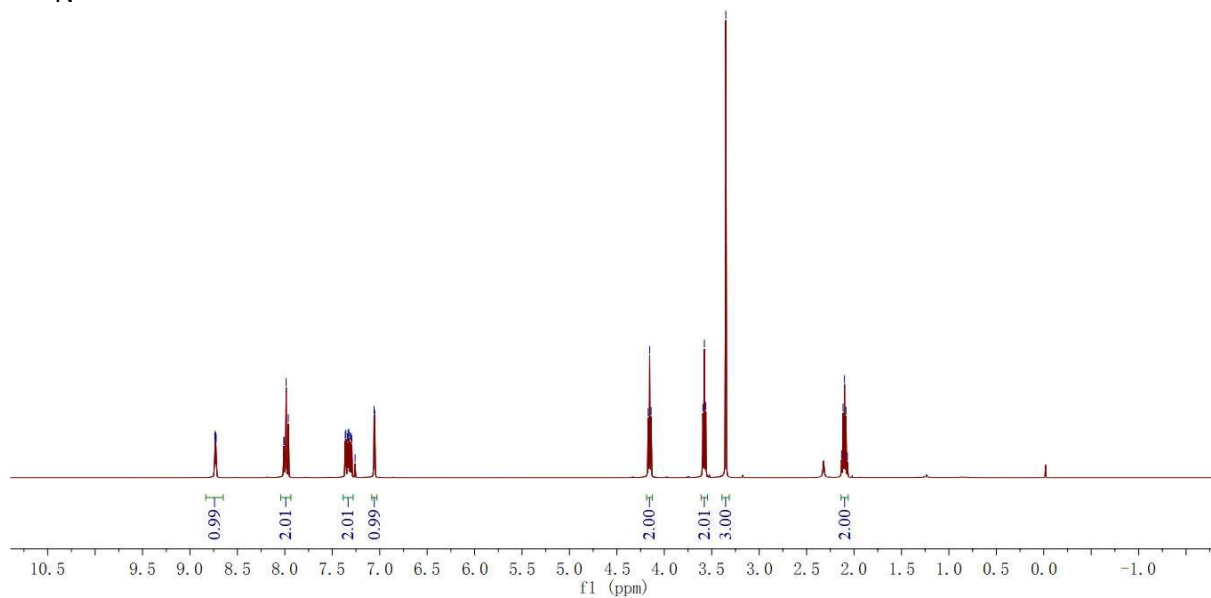

YXT-362E1-CDCl<sub>3</sub>-C

157.18  
147.95  
144.44  
134.87  
130.84  
129.41  
122.59  
121.41  
106.00  
77.48  
77.16  
76.84  
69.24  
65.23  
58.83  
29.62

<sup>13</sup>C NMR (101 MHz, CDCl<sub>3</sub>)

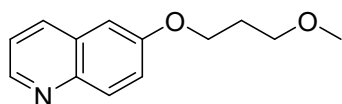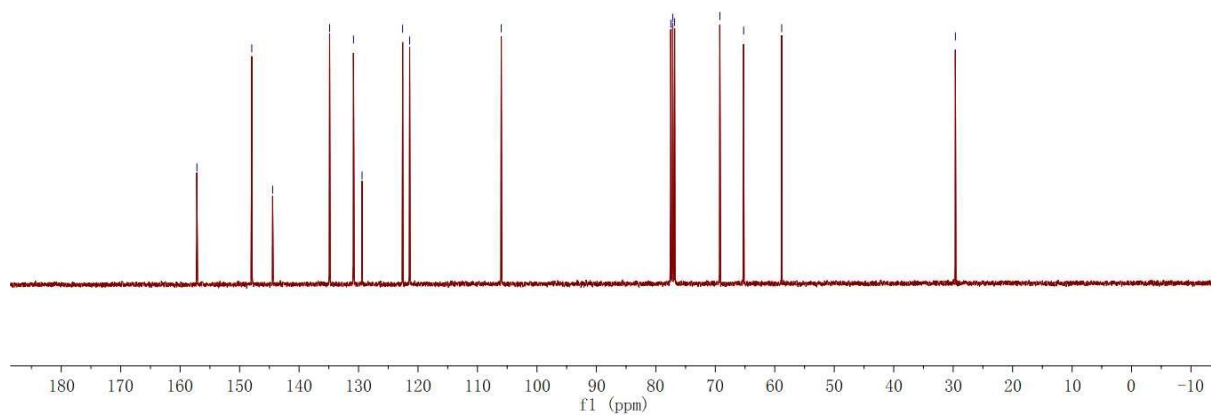

YXT-362d-CDCL3

8.72  
8.71  
8.65  
8.65  
7.96  
7.94  
7.43  
7.42  
7.41  
7.40  
7.39  
7.38  
7.26  
4.77  
4.77  
4.76  
4.75  
4.74  
4.74  
4.73  
4.72  
3.66  
3.65  
3.64  
3.62  
3.57  
3.56  
3.54  
3.53  
1.40  
1.38

$^1\text{H}$  NMR (400 MHz,  $\text{CDCl}_3$ )

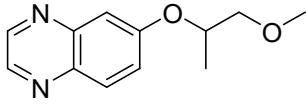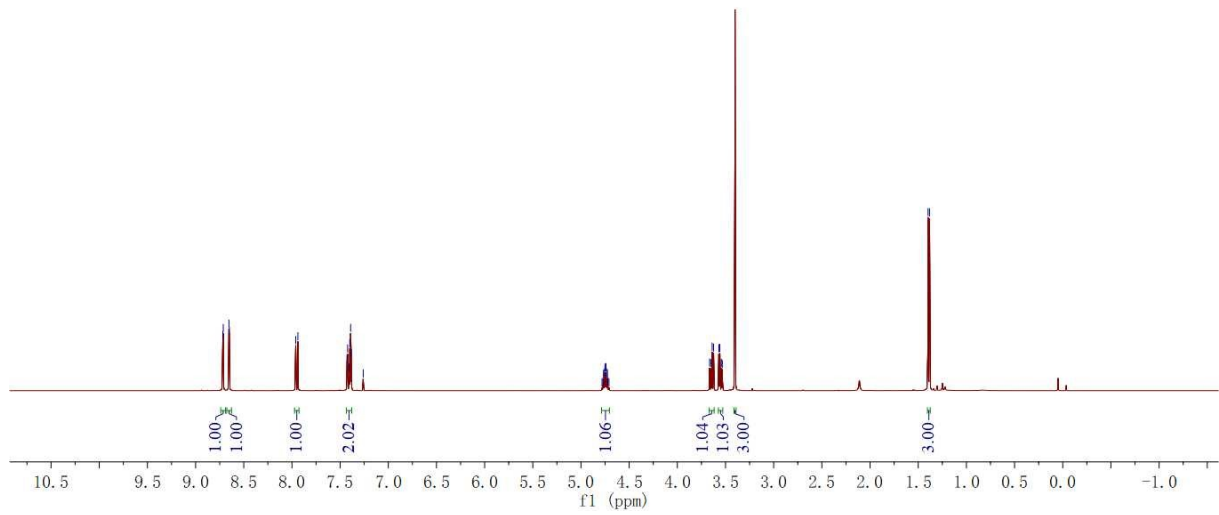

YXT-362d-CDCL3-C

159.10  
144.99  
144.65  
142.50  
139.22  
130.60  
124.47  
108.59  
77.48  
77.16  
76.84  
75.56  
73.50  
59.45  
16.42

$^{13}\text{C}$  NMR (101 MHz,  $\text{CDCl}_3$ )

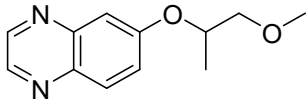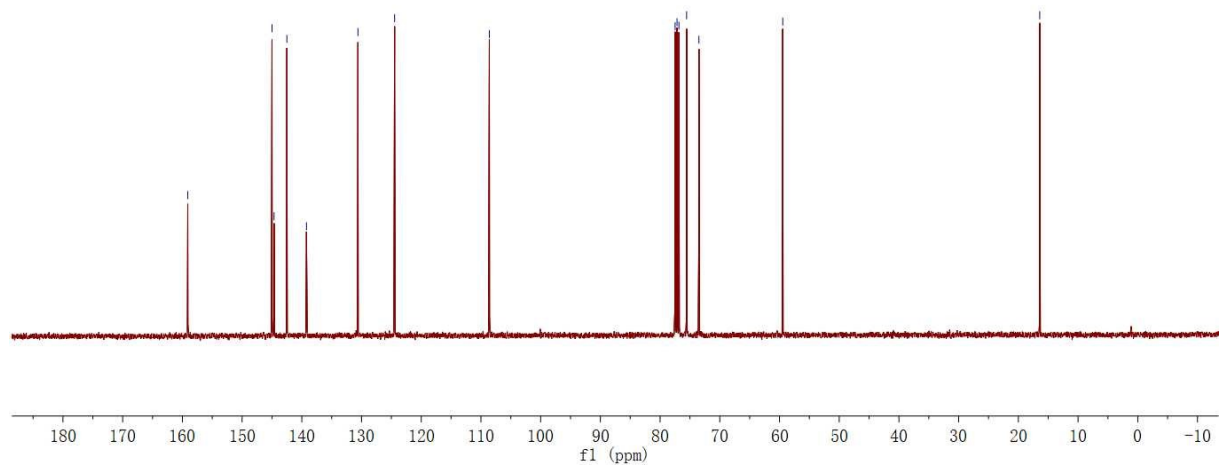

YXT-346B-CDCL3

8.32  
8.26  
8.24  
7.41  
7.40  
7.39  
7.38  
7.36  
7.34  
7.32  
7.31  
7.29  
7.27  
5.55  
5.53  
5.52

1.76  
1.75

$^1\text{H}$  NMR (400 MHz,  $\text{CDCl}_3$ )

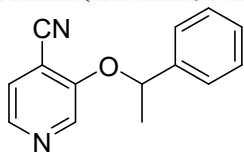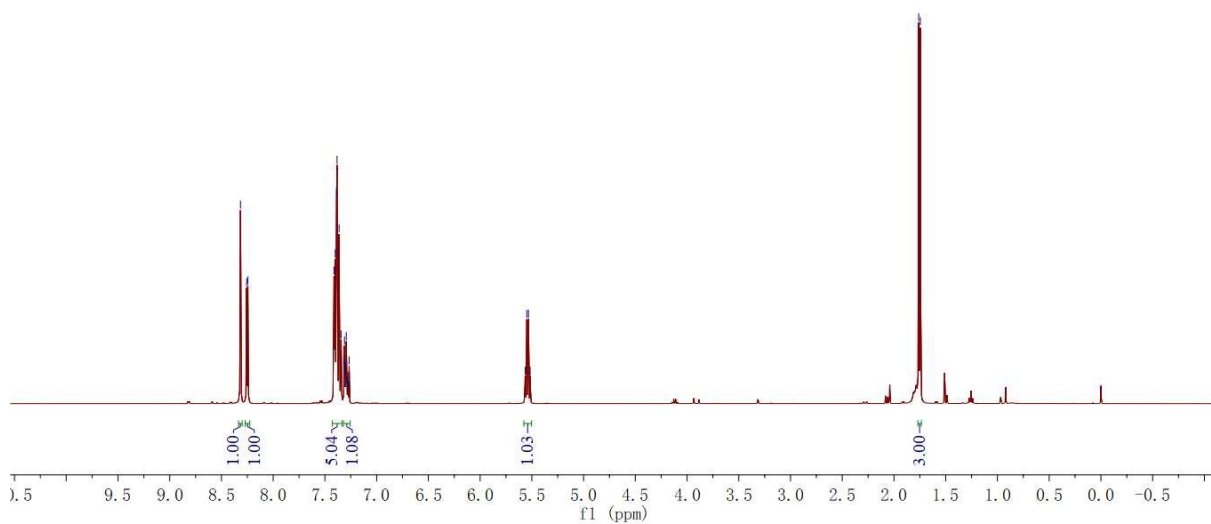

YXT-346B-CDCL3-C

154.23  
142.13  
140.87  
137.84  
129.17  
128.51  
126.11  
125.63  
114.33  
110.16

78.74  
77.48  
77.16  
76.84

24.48

$^{13}\text{C}$  NMR (101 MHz,  $\text{CDCl}_3$ )

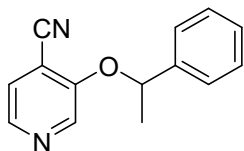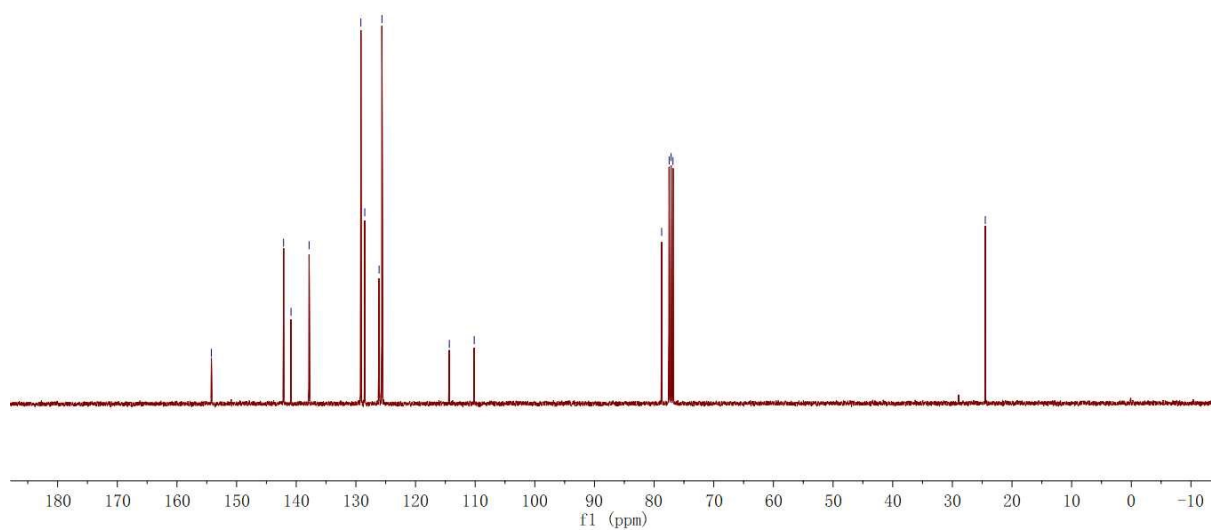

0723-YXT-3390-H

8.12  
8.12  
8.11  
8.10  
7.54  
7.54  
7.54  
6.84  
6.83  
6.82  
6.81  
6.76  
6.74

4.12  
4.10

1.27  
1.24  
1.22  
1.20  
0.62  
0.61  
0.60  
0.59  
0.58  
0.57  
0.35  
0.34  
0.33  
0.32

$^1\text{H}$  NMR (400 MHz,  $\text{CDCl}_3$ )

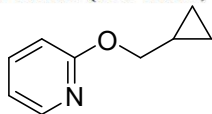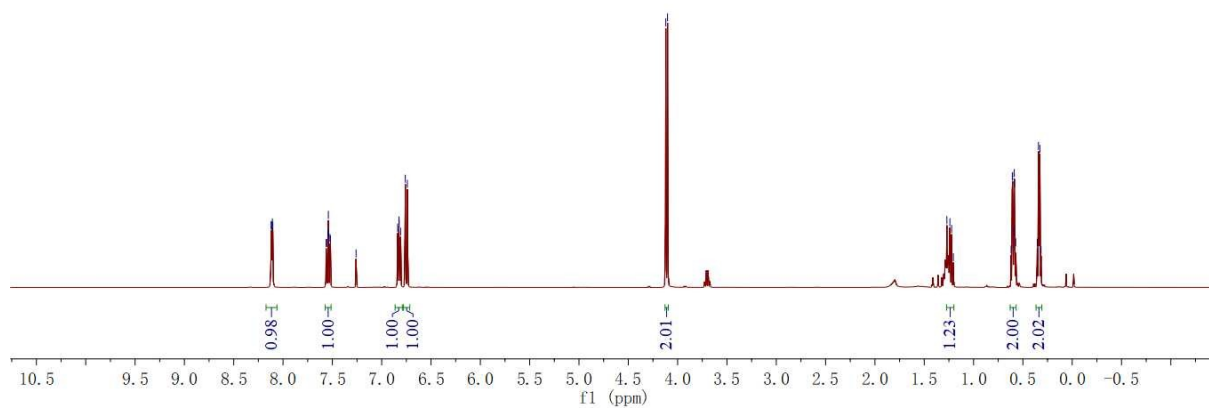

0723-YXT-3390-C

164.06

146.90

138.61

116.64

111.30

77.48

77.16

76.84

70.82

10.22

3.30

$^{13}\text{C}$  NMR (101 MHz,  $\text{CDCl}_3$ )

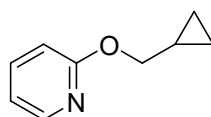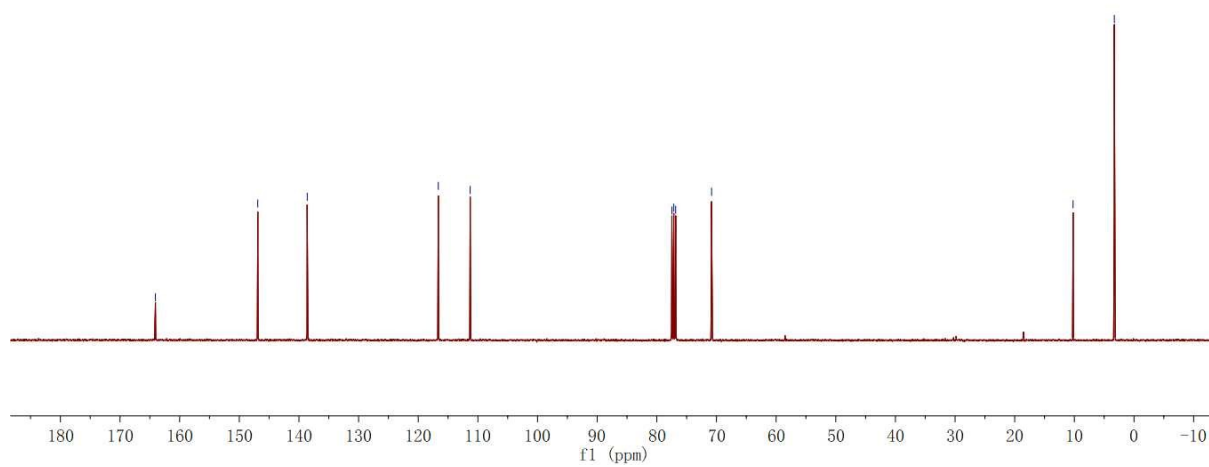

YXT-306D-CDCL3-H

7.61  
7.60  
7.41  
7.39  
7.26

5.25  
5.24  
5.22  
5.21  
5.19  
5.01  
4.99  
4.97  
4.82  
4.80  
4.80  
4.80  
4.79

-1.65

$^1\text{H}$  NMR (400 MHz,  $\text{CDCl}_3$ )

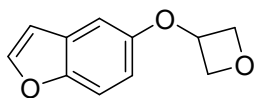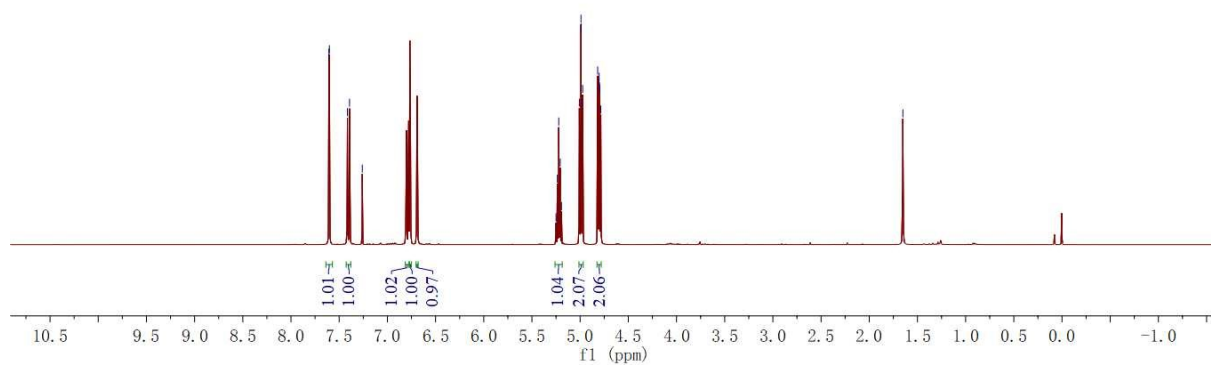

YXT-306D-CDCL3-C

152.99  
150.46  
146.17

128.21

113.47  
112.37  
106.73  
104.62

78.32  
77.48  
77.16  
76.84  
70.81

$^{13}\text{C}$  NMR (101 MHz,  $\text{CDCl}_3$ )

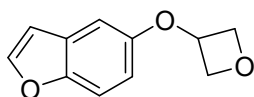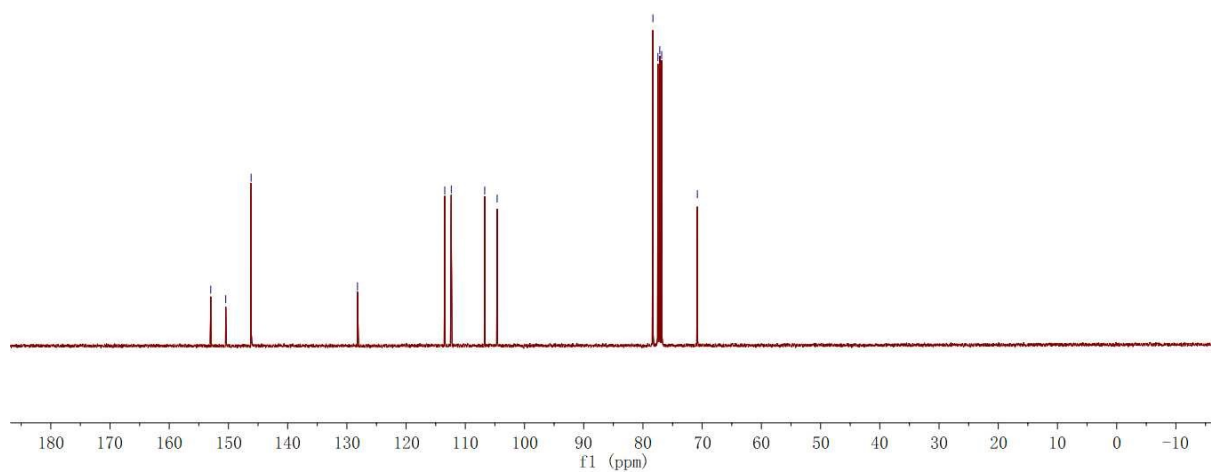



7.26  
6.88  
6.86  
5.13  
5.13  
5.12  
5.11  
5.11  
5.10  
5.10  
5.09  
3.97  
3.96  
3.95  
3.94  
3.94  
3.92  
3.92  
3.77  
2.06  
2.05  
2.04  
2.03  
2.01  
1.99  
1.97  
1.84  
1.83  
1.81  
1.80  
1.69  
1.69  
1.61  
1.60  
1.58  
1.56  
1.55  
1.43  
1.41  
1.41  
1.40  
1.39  
1.39  
1.38  
1.38  
1.37  
1.36  
1.27  
1.25  
1.24  
1.23  
1.23  
1.21  
1.21  
0.95

<sup>1</sup>H NMR (400 MHz, CDCl<sub>3</sub>)

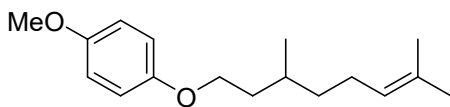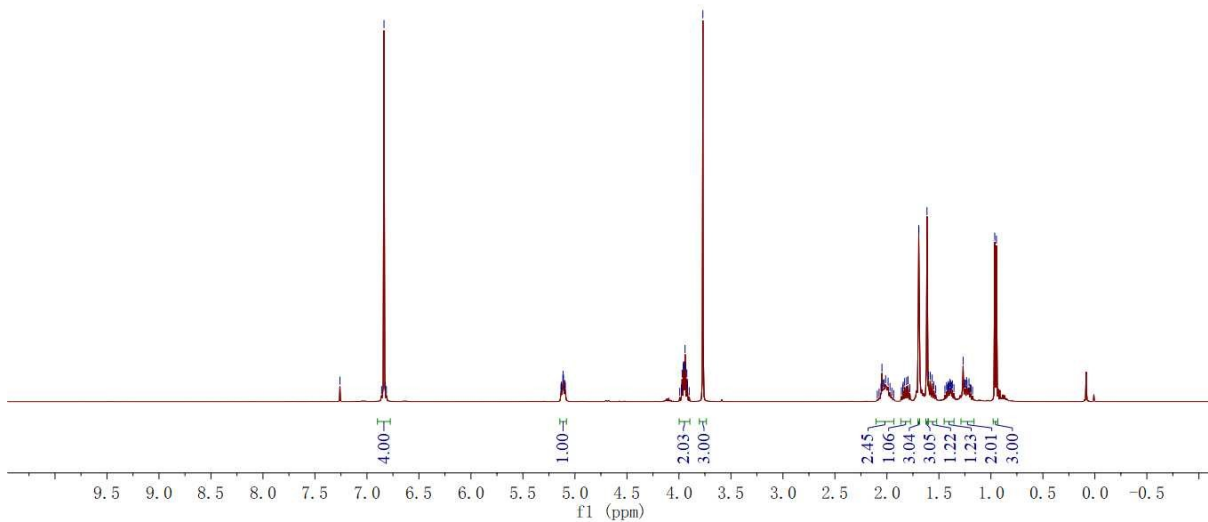

YXT-360A-CDCL3-C

<sup>13</sup>C NMR (101 MHz, CDCl<sub>3</sub>)

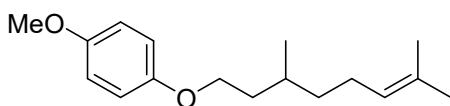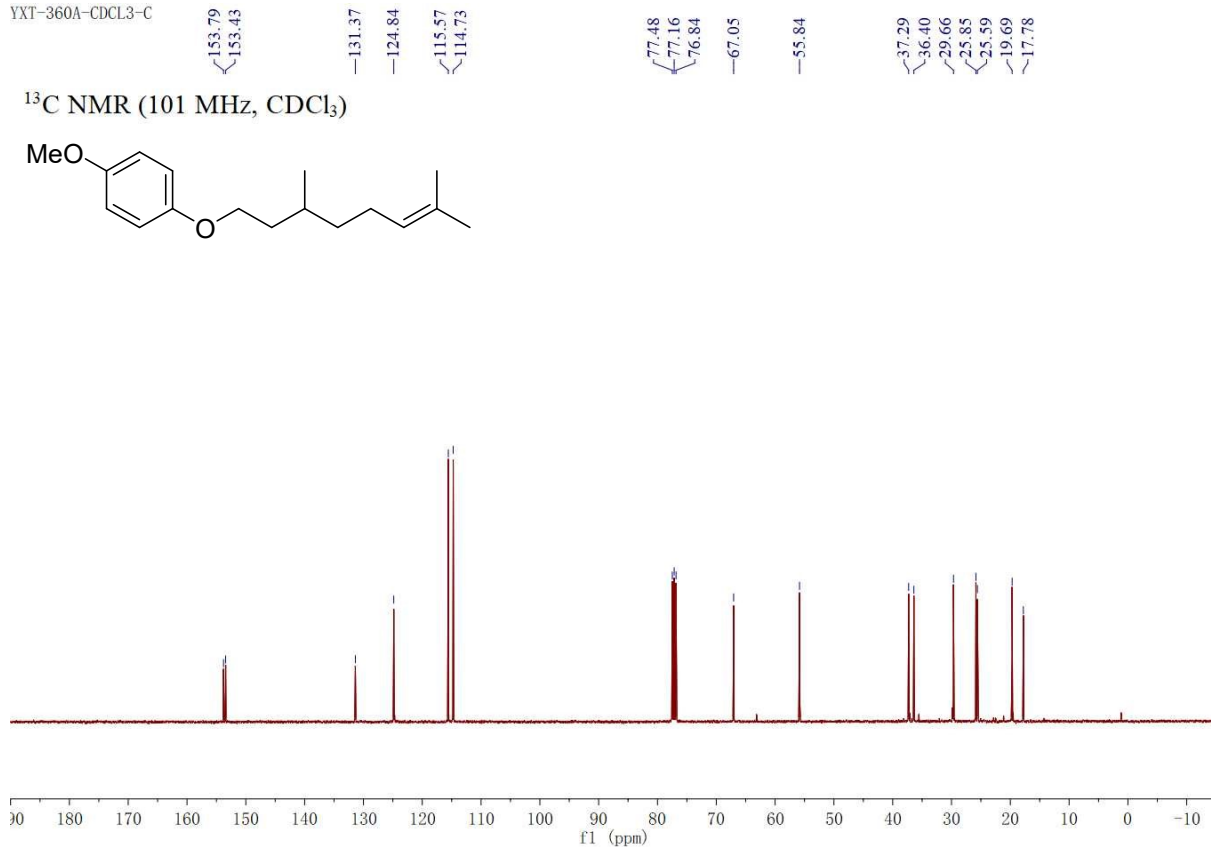

7.26  
6.88  
6.86  
6.84  
6.80  
6.79  
6.78  
6.77  
6.77  
4.26  
4.26  
4.26  
4.25  
4.24  
4.24  
4.23  
4.23  
3.76  
2.36  
2.35  
2.34  
2.33  
2.32  
2.31  
2.30  
2.28  
2.26  
2.23  
2.22  
2.20  
2.20  
1.79  
1.78  
1.77  
1.76  
1.75  
1.74  
1.73  
1.72  
1.71  
1.59  
1.36  
1.36  
1.35  
1.35  
1.34  
1.32  
1.29  
1.25  
1.14  
1.13  
1.11  
1.10  
0.93  
0.92

<sup>1</sup>H NMR (400 MHz, CDCl<sub>3</sub>)

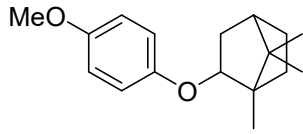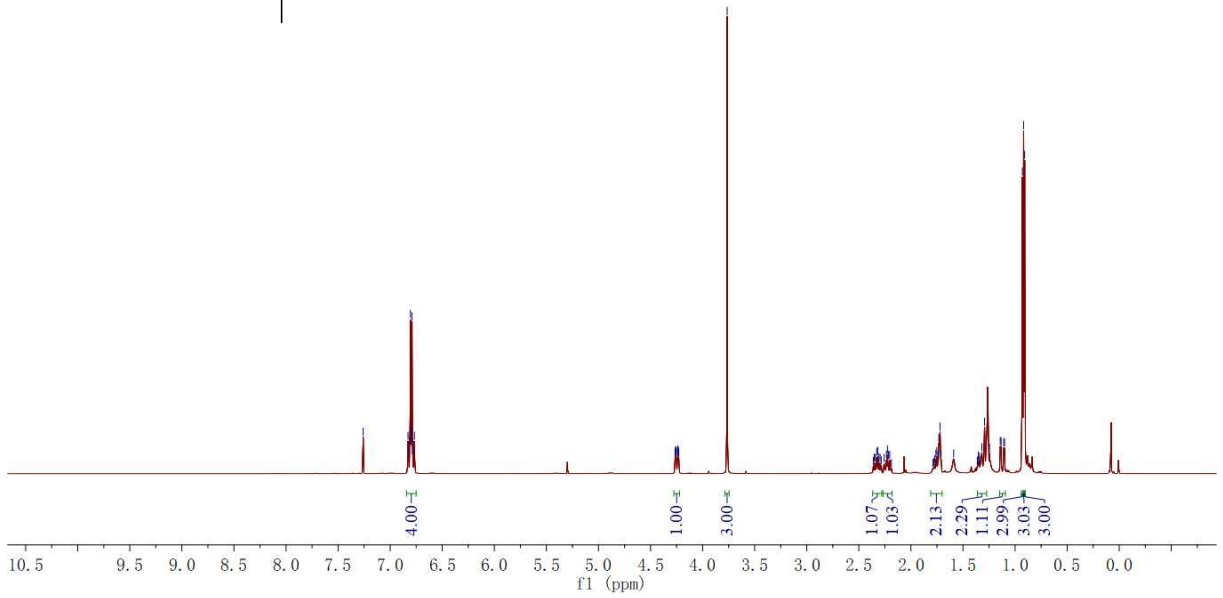

YXT-360B-CDCL3-C

153.58  
153.55  
116.49  
114.74  
83.58  
77.48  
77.16  
76.84  
55.91  
49.63  
47.70  
45.30  
36.98  
29.85  
28.14  
26.89  
19.89  
19.09  
13.92

<sup>13</sup>C NMR (101 MHz, CDCl<sub>3</sub>)

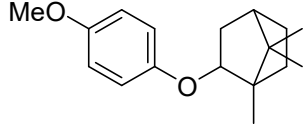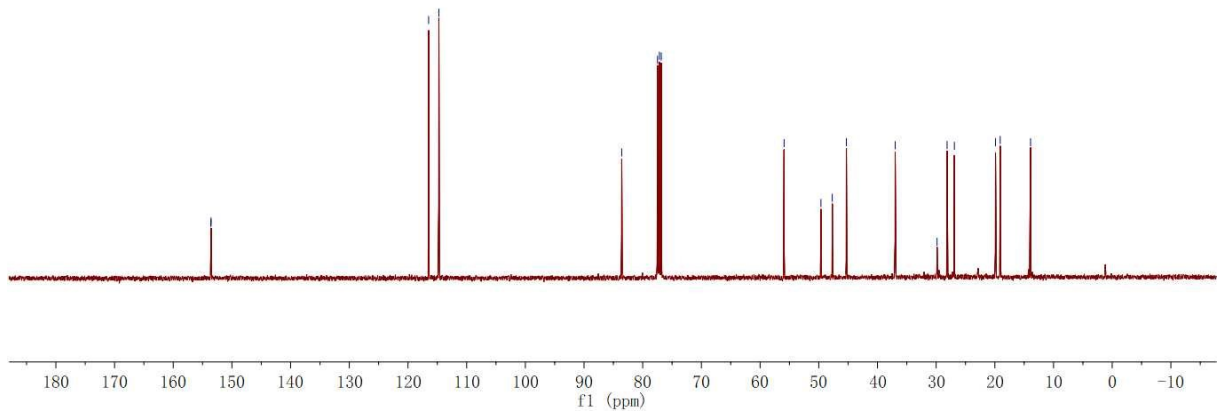

7.26  
6.86  
6.86  
6.86  
6.83  
6.83  
6.82  
6.81  
6.80  
3.91  
3.88  
3.87  
3.85  
3.84  
3.77  
2.29  
2.28  
2.27  
2.26  
2.25  
2.25  
2.13  
2.10  
1.73  
1.72  
1.72  
1.69  
1.69  
1.68  
1.60  
1.50  
1.48  
1.47  
1.47  
1.45  
1.45  
1.44  
1.43  
1.42  
1.42  
1.41  
1.40  
1.10  
1.09  
1.06  
1.06  
1.03  
1.00  
0.97  
0.96  
0.94  
0.93  
0.91  
0.90  
0.80  
-0.79

<sup>1</sup>H NMR (400 MHz, CDCl<sub>3</sub>)

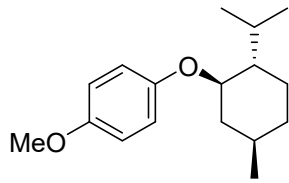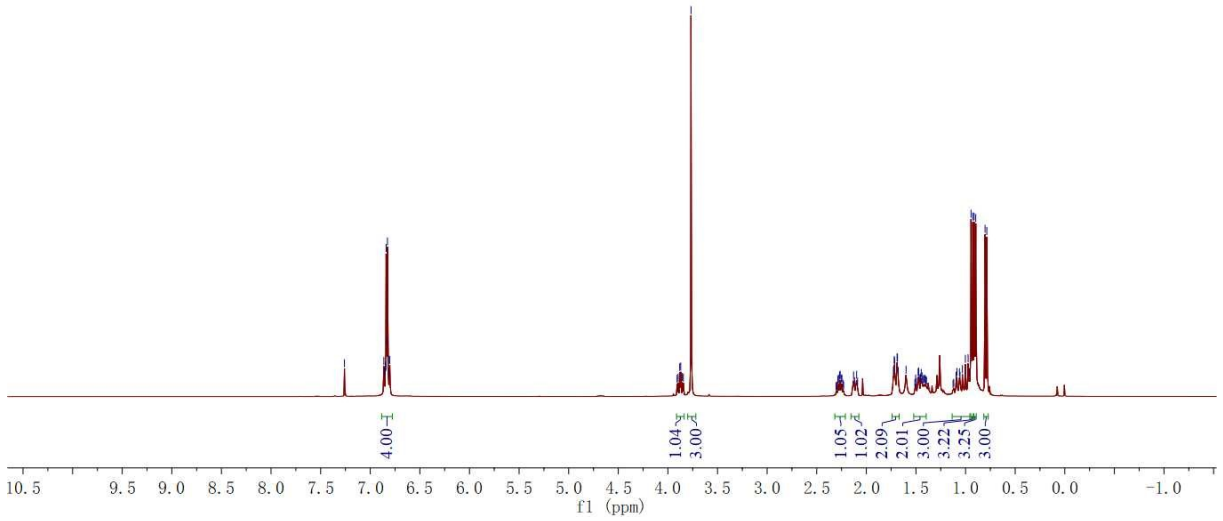

YXT-360C-CDCL3-C

153.93  
152.55  
117.63  
114.78  
78.97  
77.48  
77.16  
76.84  
55.85  
48.31  
40.63  
34.67  
31.59  
26.09  
23.74  
22.31  
20.98  
16.61

<sup>13</sup>C NMR (101 MHz, CDCl<sub>3</sub>)

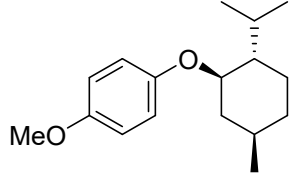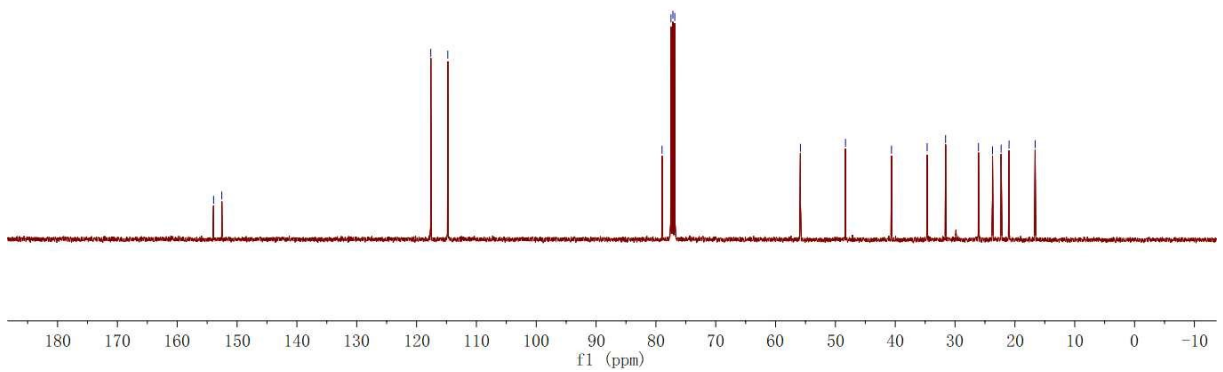

8.82  
8.80  
8.17  
8.16  
8.15  
8.15  
7.76  
7.74  
7.74  
7.74  
7.72  
7.65  
7.65  
7.63  
7.63  
7.47  
7.45  
6.72  
6.70  
6.69  
6.68  
6.68  
6.67  
6.66  
6.65  
5.98  
5.97  
5.71  
4.96  
4.96  
4.96  
4.92  
4.92  
4.91  
4.90  
4.90  
4.90  
4.88  
4.87  
4.87  
3.64  
3.21  
3.14  
3.13  
3.11  
2.70  
2.69  
2.68  
2.66  
2.02  
1.86  
1.85  
1.56

<sup>1</sup>H NMR (400 MHz, CDCl<sub>3</sub>)

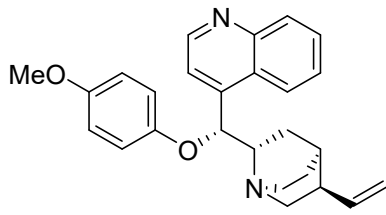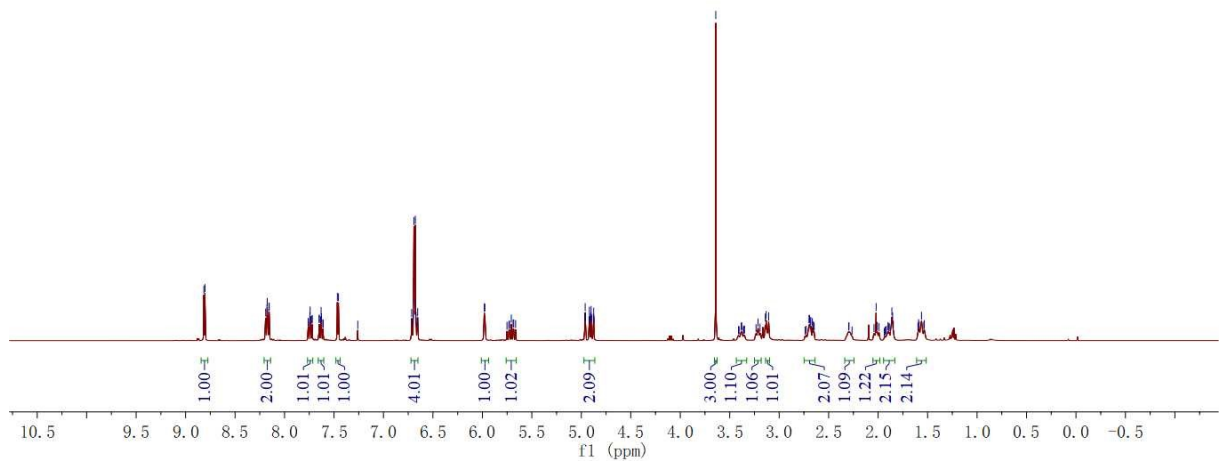

YXT-362J-CDCL<sub>3</sub>-C

154.19  
151.17  
150.24  
145.77  
141.67  
130.71  
129.33  
127.17  
125.53  
122.85  
118.39  
116.35  
114.76  
114.46

79.43  
77.48  
77.16  
76.84

60.71  
57.23  
55.62

43.41  
39.92

28.09  
27.67  
21.31

<sup>13</sup>C NMR (101 MHz, CDCl<sub>3</sub>)

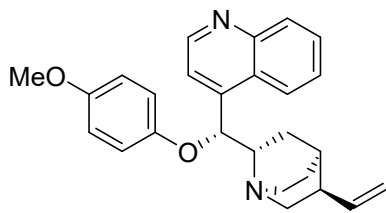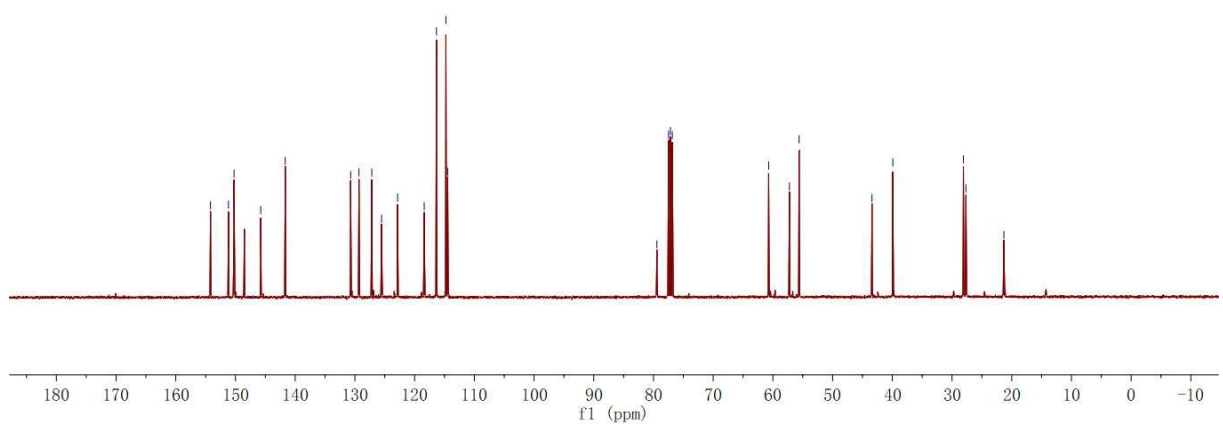

YXT-365B-CDCl<sub>3</sub>

-7.26  
-6.81

3.97  
3.96  
3.94  
3.91  
3.90  
3.88  
3.72  
3.71  
3.70  
2.50  
2.49  
2.46  
2.45  
1.93  
1.73  
1.48  
0.98  
0.96  
0.94

<sup>1</sup>H NMR (400 MHz, CDCl<sub>3</sub>)

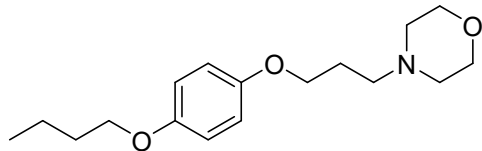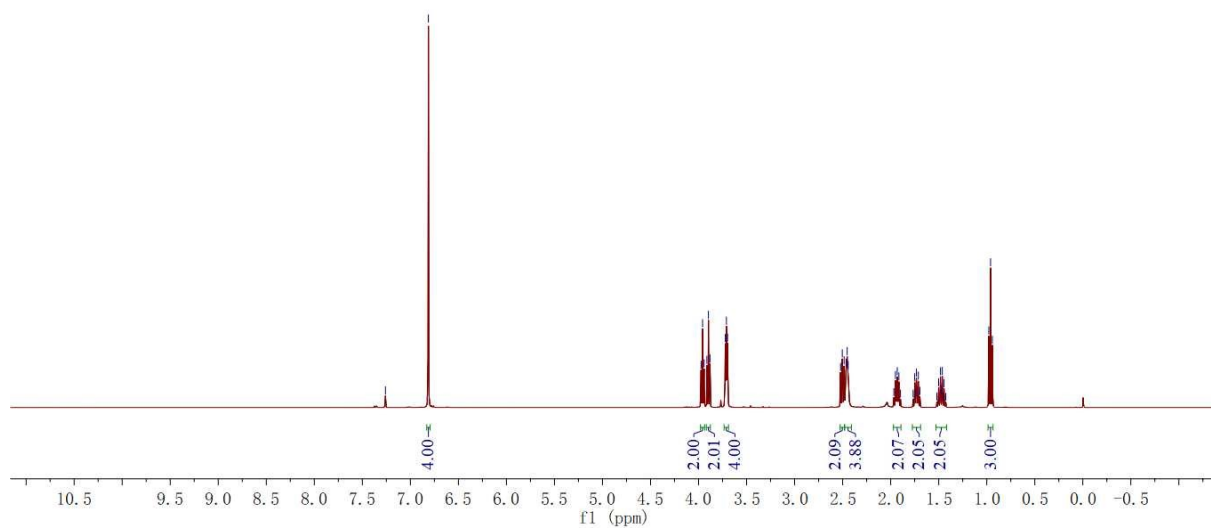

YXT-365B-CDCl<sub>3</sub>-C-2

153.43  
153.12

115.51  
115.50

77.48  
77.16  
76.84  
68.42  
67.10  
66.86

55.73  
53.86

31.55  
26.67  
19.36  
13.98

<sup>13</sup>C NMR (101 MHz, CDCl<sub>3</sub>)

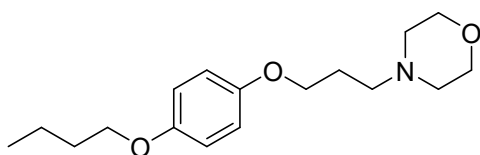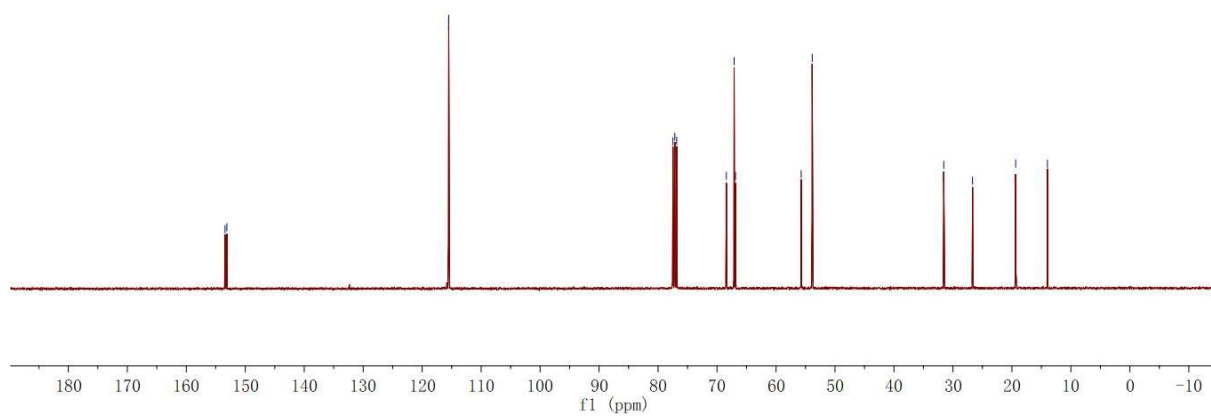

YXT-362F-CDCL3

7.26  
7.14  
7.12  
6.90  
6.89  
6.88  
6.87  
6.86

4.45  
4.44  
4.43  
4.43  
4.42  
4.41  
4.40

3.68  
3.37  
3.36  
3.35  
3.34  
3.34  
1.93  
1.92  
1.91  
1.90  
1.89  
1.88  
1.87  
1.78  
1.77  
1.76  
1.75  
1.74  
1.73  
1.72  
1.72  
1.71  
1.70  
1.47

$^1\text{H}$  NMR (400 MHz,  $\text{CDCl}_3$ )

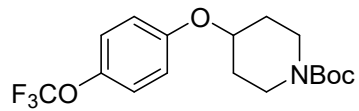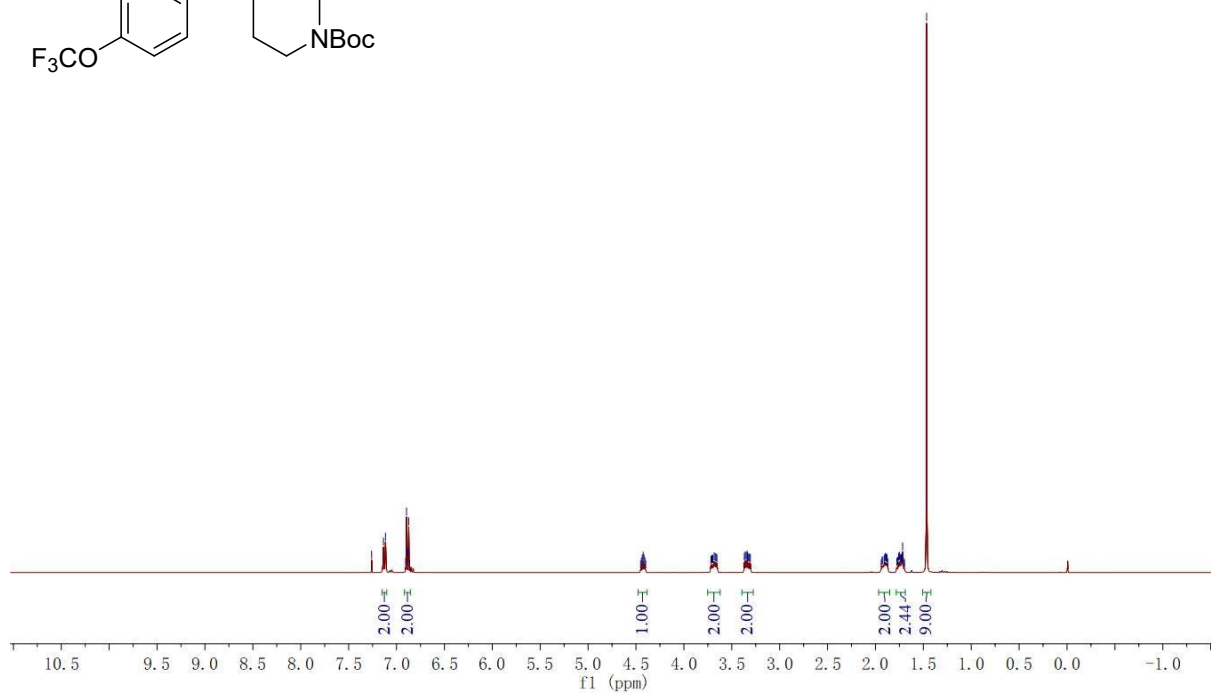

YXT-362F-CDCL3

-58.38

$^{19}\text{F}$  NMR (376 MHz,  $\text{CDCl}_3$ )

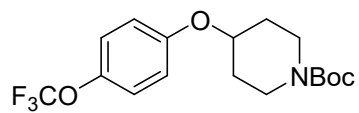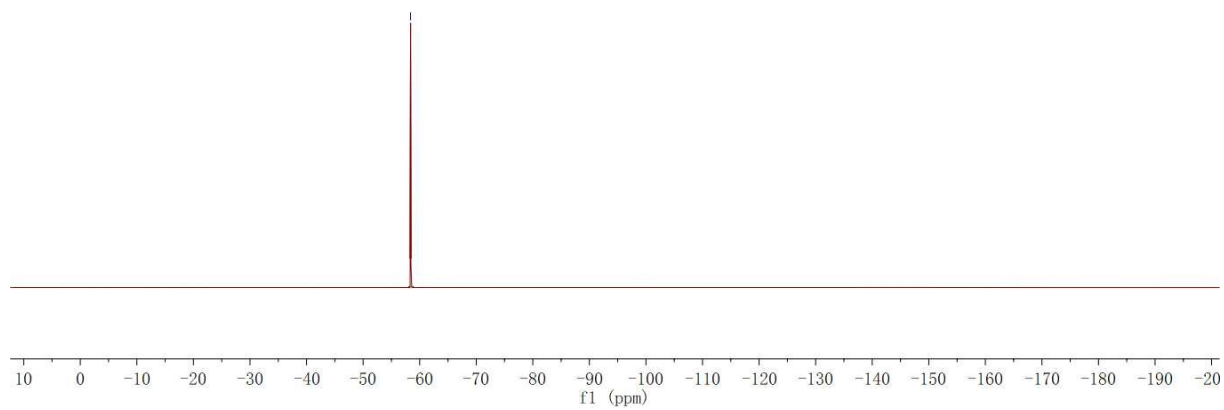

0919-YXT-362F-C

155.84  
154.99  
143.03  
143.01  
142.99  
142.98  
124.50  
122.63  
121.95  
119.41  
117.00  
116.86

-79.86  
-72.88

-40.67  
-30.53  
-28.55

$^{13}\text{C}$  NMR (101 MHz,  $\text{CDCl}_3$ )

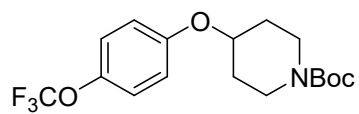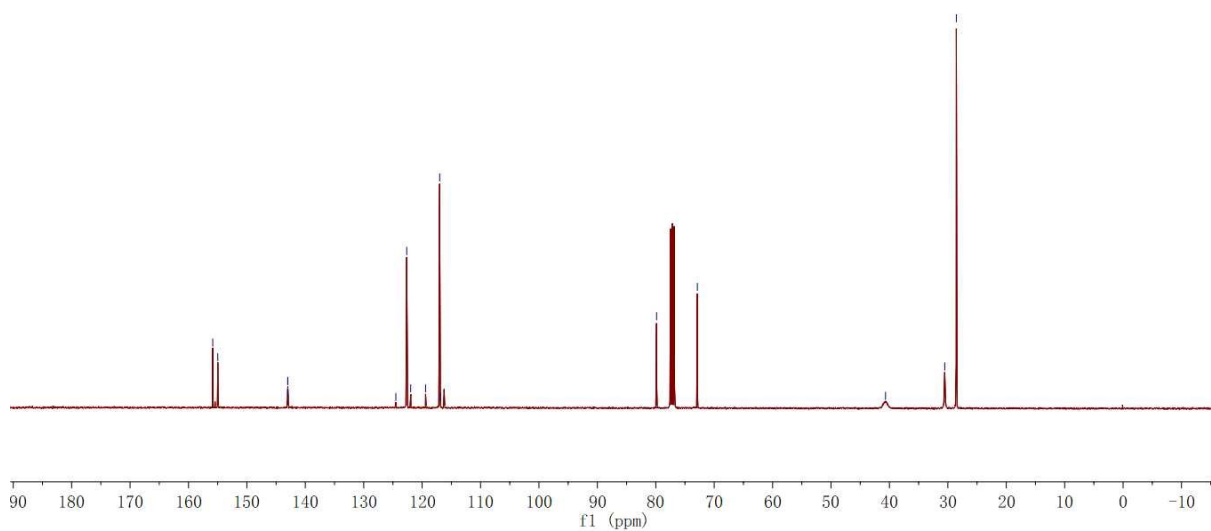

YXT-283D- $\text{CDCl}_3$

7.26  
6.95  
6.94  
6.93  
6.92  
6.91  
6.87  
6.86  
6.86  
6.85  
6.84  
6.83

-3.79

$^1\text{H}$  NMR (400 MHz,  $\text{CDCl}_3$ )

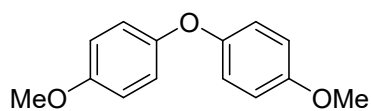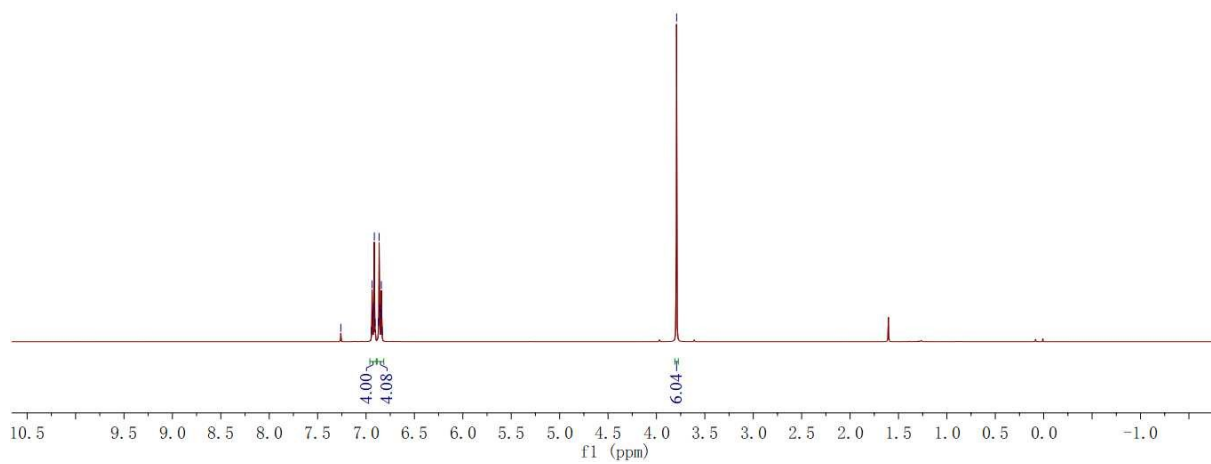

YXT-283D-CDCL3-C

155.47  
151.73

119.66  
114.89

77.48  
77.16  
76.84

55.80

$^{13}\text{C}$  NMR (101 MHz,  $\text{CDCl}_3$ )

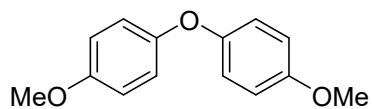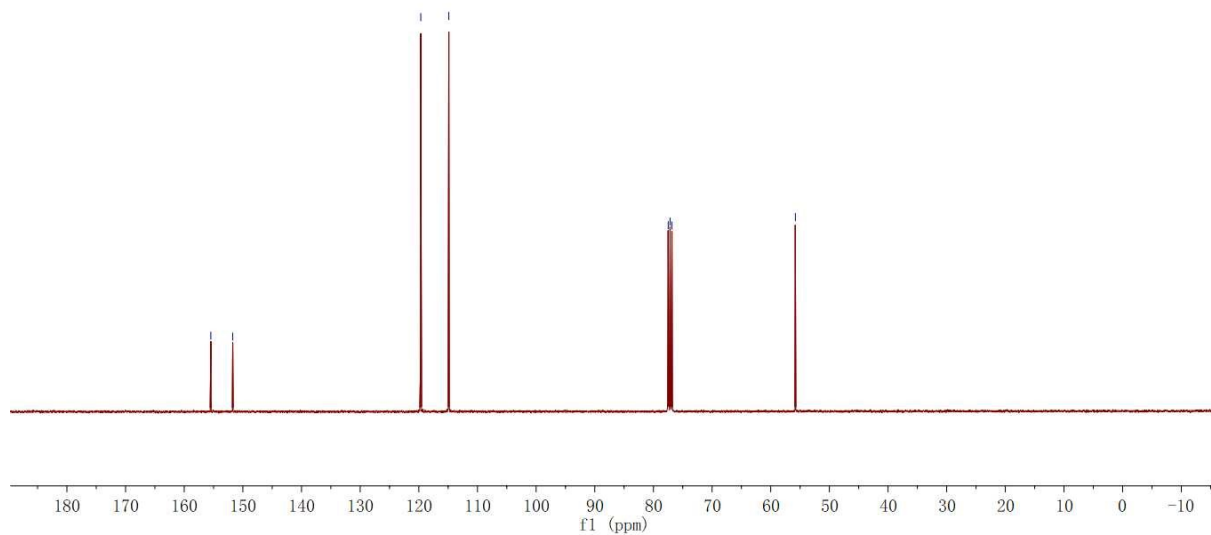

YXT-291C-CDCl3

7.96  
7.88  
7.56  
7.55  
7.53  
7.46  
7.44  
7.42  
7.35  
7.33  
7.32  
7.26  
7.06  
7.05  
7.04  
7.04  
7.02  
7.02  
6.94  
6.94  
6.93  
6.92  
6.91  
6.90

3.83

$^1\text{H}$  NMR (400 MHz,  $\text{CDCl}_3$ )

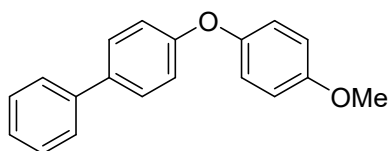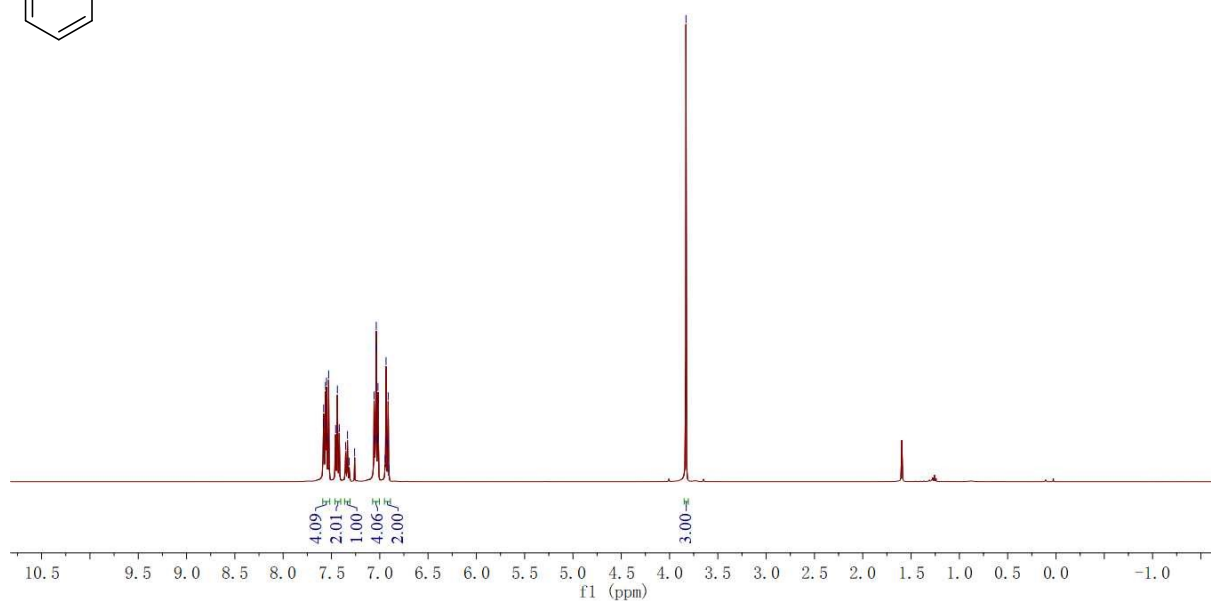



YXT-291C-CDCl<sub>3</sub>-C

158.26  
156.14  
150.16  
140.75  
135.65  
128.89  
128.44  
127.05  
126.98  
121.06  
117.90  
115.04

77.48  
77.16  
76.84

55.79

<sup>13</sup>C NMR (101 MHz, CDCl<sub>3</sub>)

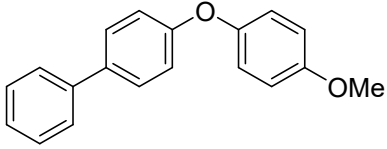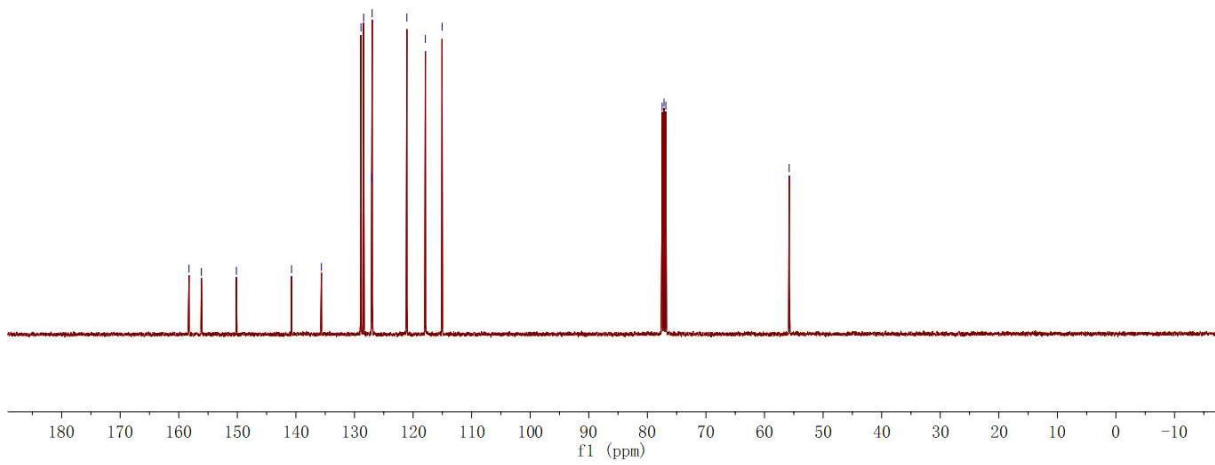

YXT-342A-CDCl<sub>3</sub>

7.48  
7.47  
7.47  
7.46  
7.45  
7.45  
7.02  
7.01  
7.00  
6.99  
6.96  
6.95  
6.94  
6.94  
6.92  
6.91  
6.90  
6.89

3.82

0.27

<sup>1</sup>H NMR (400 MHz, CDCl<sub>3</sub>)

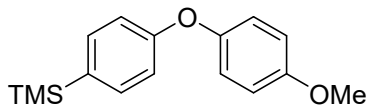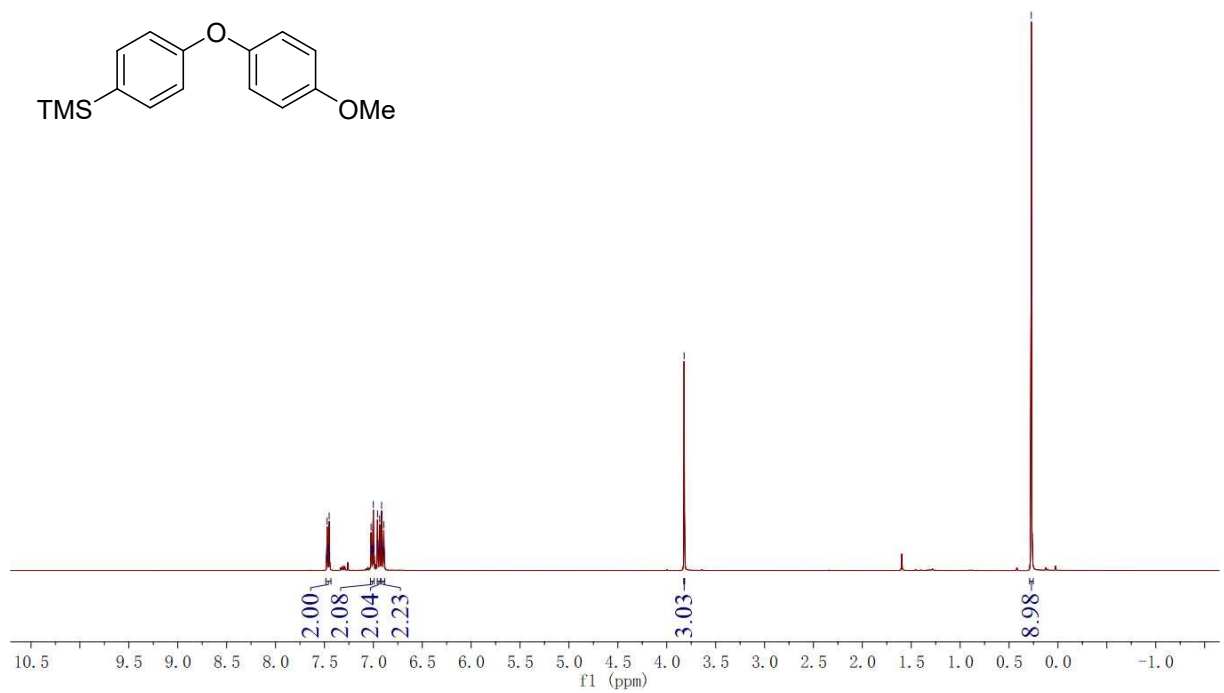

YXT-342A-1-C

~159.50  
~156.16  
~149.88  
~134.94  
~133.64  
~121.25  
~116.91  
~115.00  
77.48  
77.16  
76.84  
-55.79  
-0.83

<sup>13</sup>C NMR (101 MHz, CDCl<sub>3</sub>)

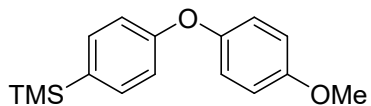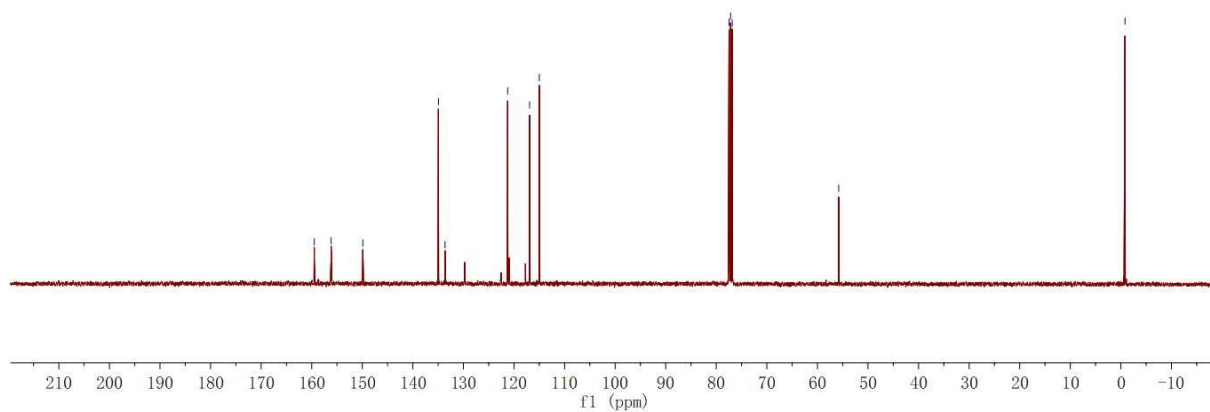

YXT-310D-CDCL3

7.26  
6.93  
6.92  
6.90  
6.89  
6.86  
6.85  
6.84  
6.84  
6.83  
6.83  
6.82  
6.81  
6.80  
6.67  
6.66  
6.65  
6.65  
6.64  
6.63  
6.63  
-3.78

<sup>1</sup>H NMR (400 MHz, CDCl<sub>3</sub>)

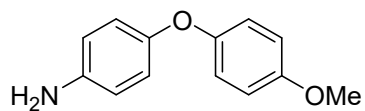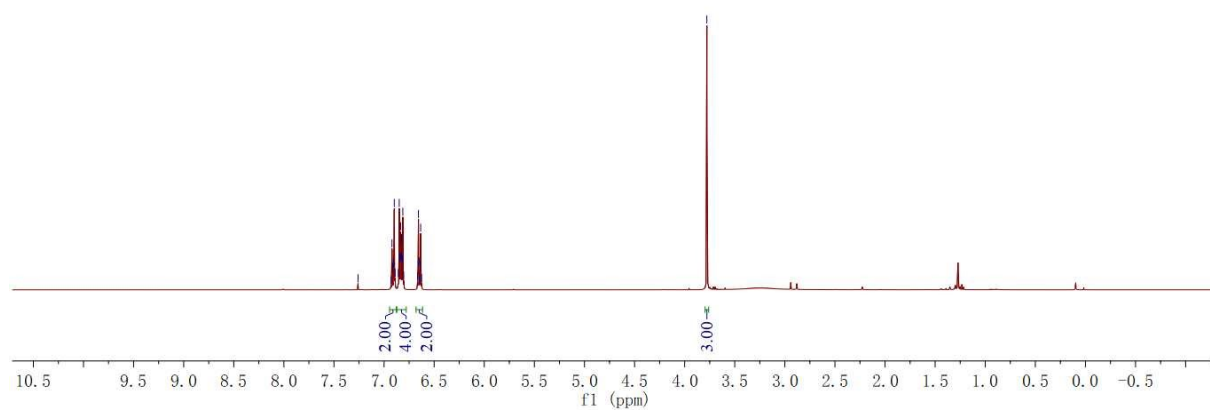

YXT-310D-CDCl<sub>3</sub>-C

155.12  
152.15  
150.14  
142.15  
120.03  
119.16  
116.33  
114.77  
77.48  
77.16  
76.84  
55.75

<sup>13</sup>C NMR (101 MHz, CDCl<sub>3</sub>)

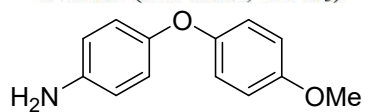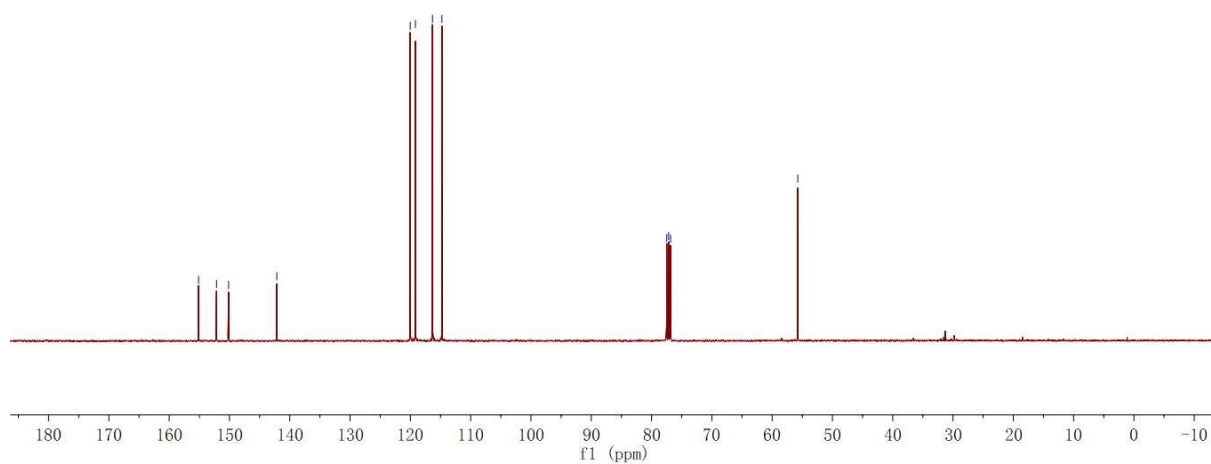

YXT-291F-CDCl<sub>3</sub>-C

7.28  
7.21  
7.19  
7.17  
7.02  
7.01  
7.00  
6.99  
6.99  
6.98  
6.91  
6.90  
6.89  
6.88  
6.87  
6.87  
6.61  
6.61  
6.59  
6.59  
6.53  
6.53  
6.52  
6.52  
6.51  
3.81  
3.77

<sup>1</sup>H NMR (400 MHz, CDCl<sub>3</sub>)

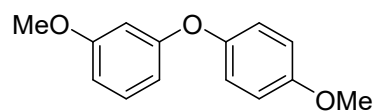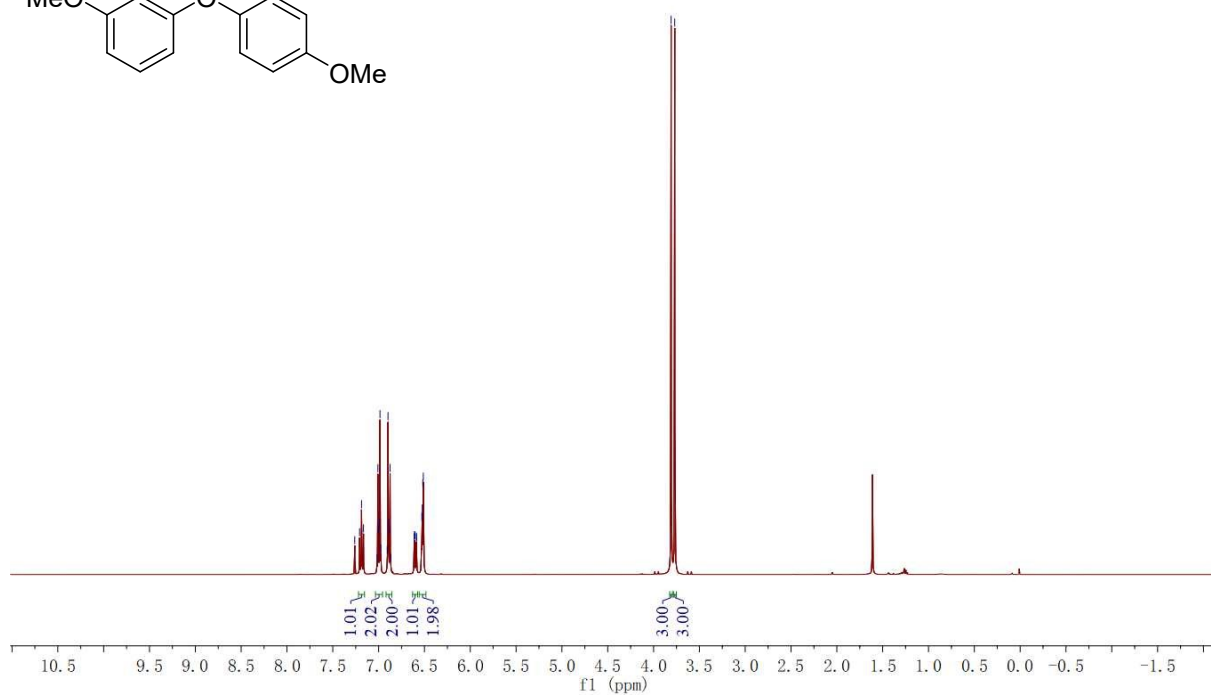

YXT-291F-CDCL3-C

161.02  
159.94  
156.12  
149.98  
130.14  
121.13  
114.97  
109.83  
108.14  
103.79  
77.48  
77.16  
76.84  
55.78  
55.45

$^{13}\text{C}$  NMR (101 MHz,  $\text{CDCl}_3$ )

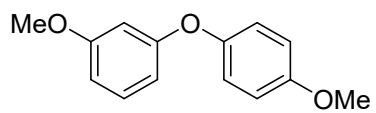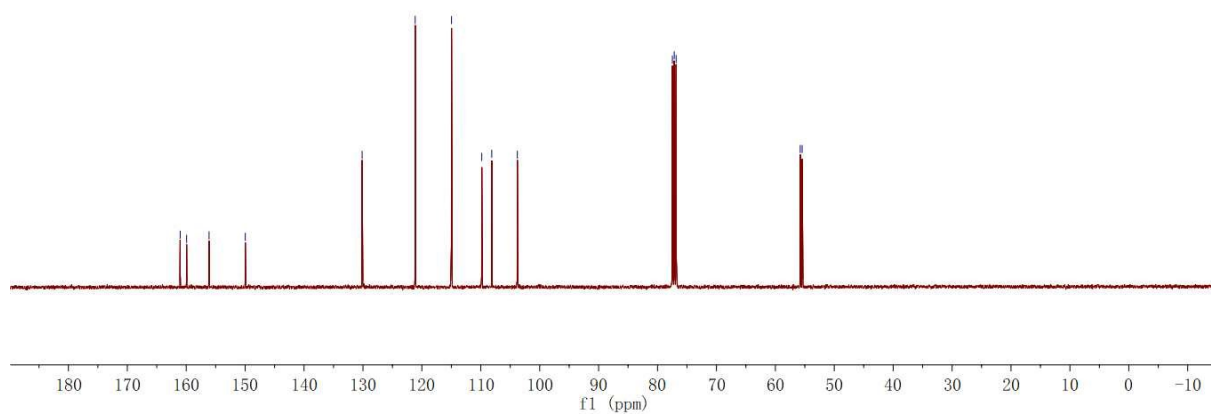

YXT-291D-CDCL3

7.17  
7.15  
7.13  
7.05  
7.03  
7.02  
6.94  
6.92  
6.90  
6.82  
6.81  
6.80  
6.80  
6.79  
6.79  
6.78  
6.77  
6.77  
6.76  
6.72  
6.70  
3.71  
2.20

$^1\text{H}$  NMR (400 MHz,  $\text{CDCl}_3$ )

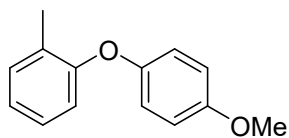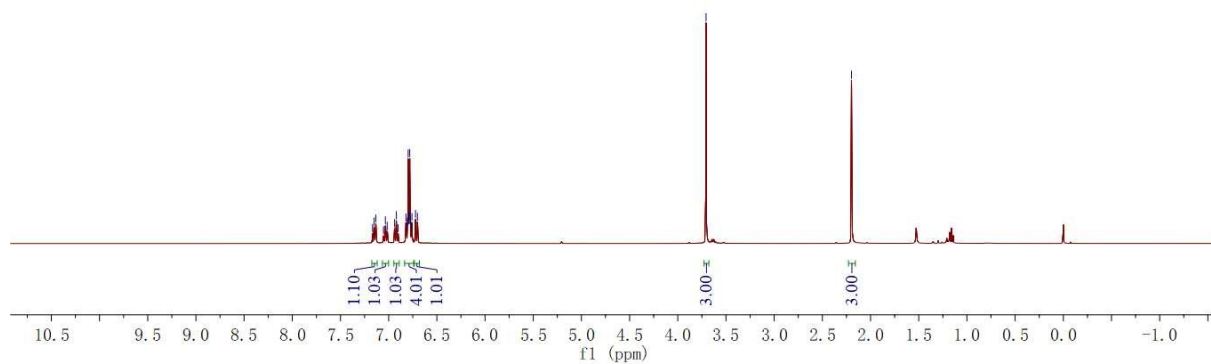

YXT-291D-CDCL3-C

155.93  
155.41  
151.23

131.42  
129.20  
127.09  
123.21  
119.44  
118.15  
114.92

77.48  
77.16  
76.84

55.80

16.35

<sup>13</sup>C NMR (101 MHz, CDCl<sub>3</sub>)

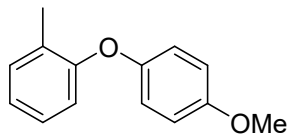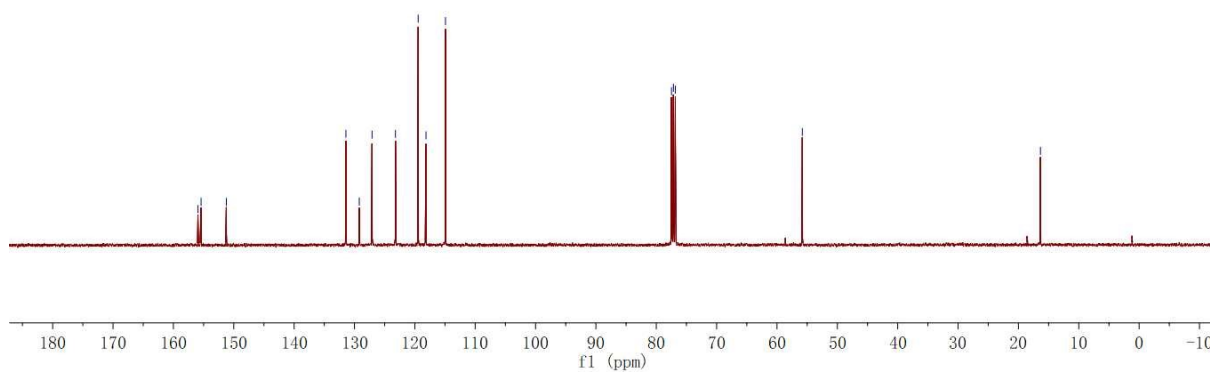

YXT-

7.60  
7.58  
7.56  
7.45  
7.44  
7.43  
7.41  
7.39  
7.37  
7.33  
7.31  
7.27  
7.26  
7.25  
7.18  
7.16  
6.94  
6.93  
6.92  
6.91  
6.90  
6.85  
6.83  
3.78

1.57

<sup>1</sup>H NMR (400 MHz, CDCl<sub>3</sub>)

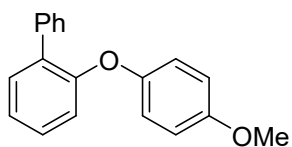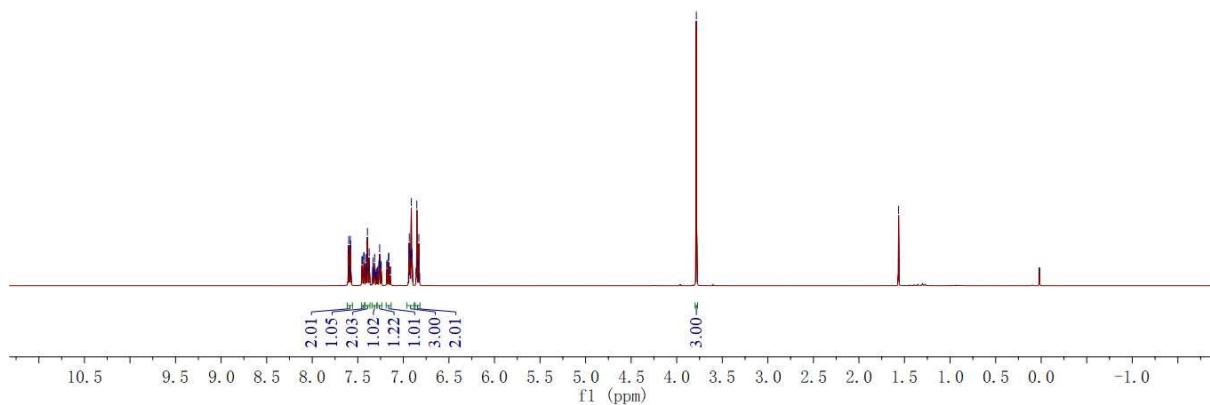

YXT-310E-CDCl<sub>3</sub>-C

155.60  
154.98  
151.06  
138.05  
132.94  
131.33  
129.43  
128.70  
128.24  
127.28  
123.37  
120.17  
118.70  
114.90

77.48  
77.16  
76.84

55.78

<sup>13</sup>C NMR (101 MHz, CDCl<sub>3</sub>)

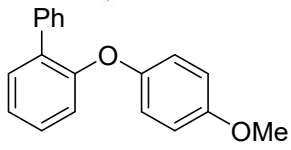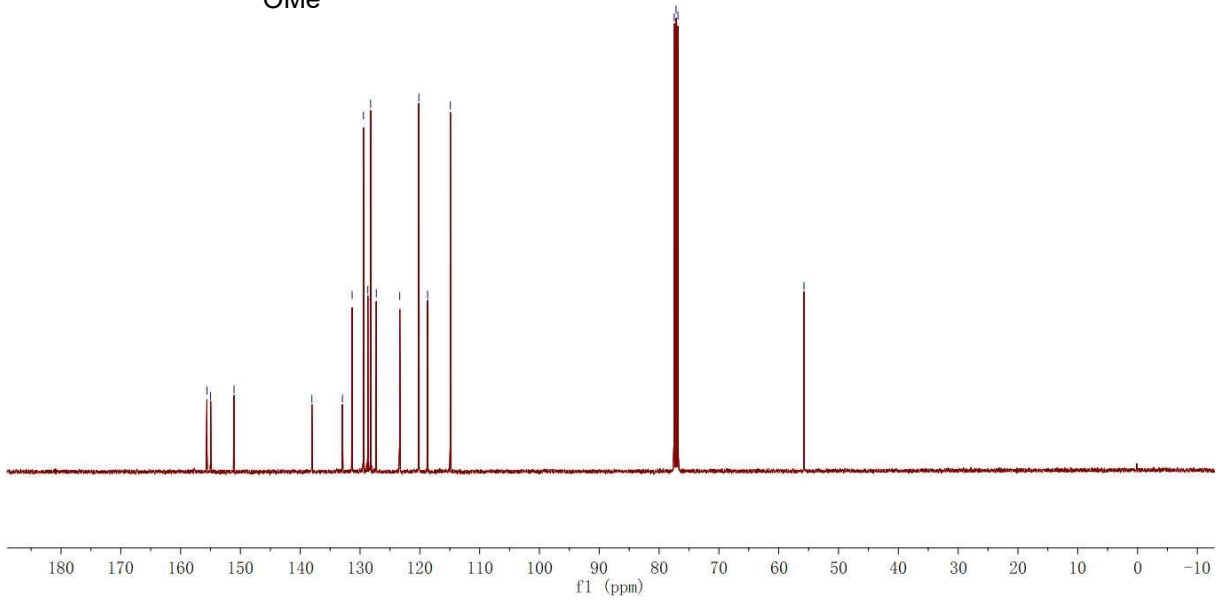

YXT-8864-CDCl<sub>3</sub>

7.38  
7.34  
7.31  
7.29  
7.26  
7.07  
7.07  
7.07  
7.05  
7.03  
7.01  
7.00  
6.99  
6.99  
6.98  
6.97  
6.97  
6.96  
6.96  
6.95  
6.95  
6.95  
6.91  
6.91  
6.90  
6.89  
6.88  
6.88

1.58

<sup>1</sup>H NMR (400 MHz, CDCl<sub>3</sub>)

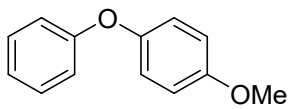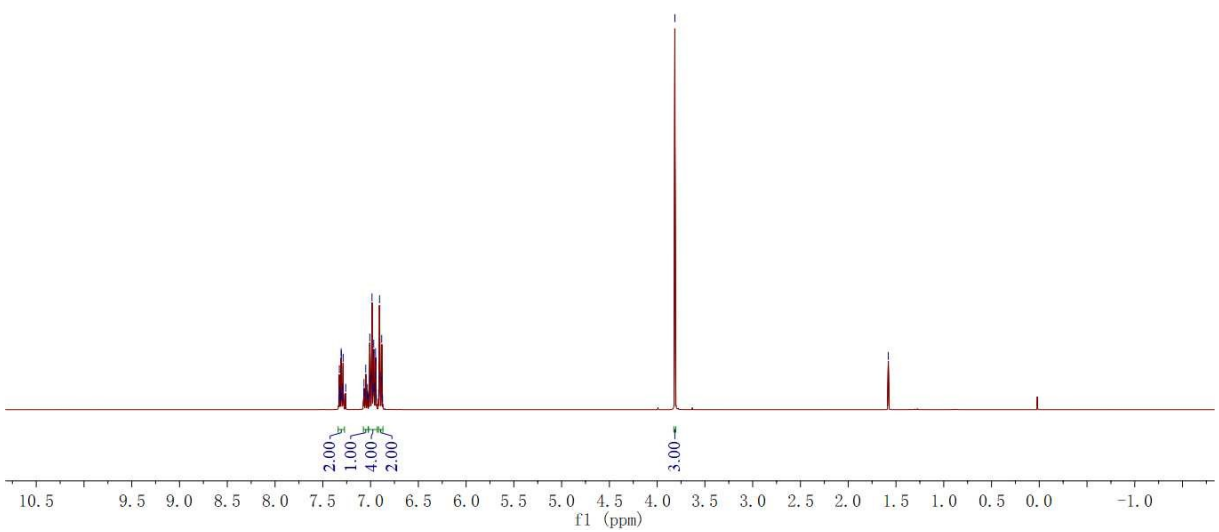

YXT-388A-CDCL3-C

$^{13}\text{C}$  NMR (101 MHz,  $\text{CDCl}_3$ )

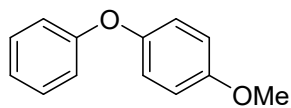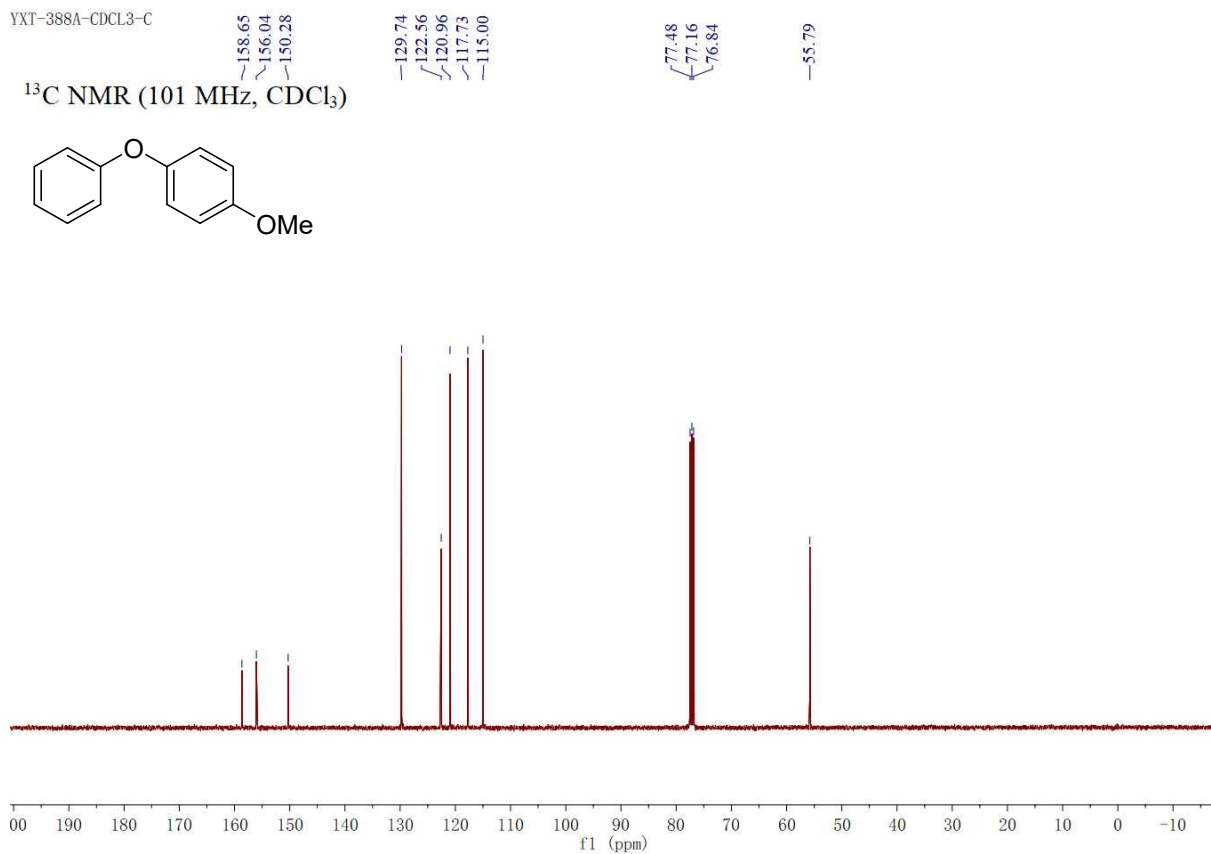

YXT-391

$^1\text{H}$  NMR (400 MHz,  $\text{CDCl}_3$ )

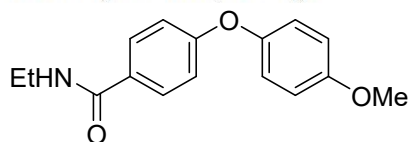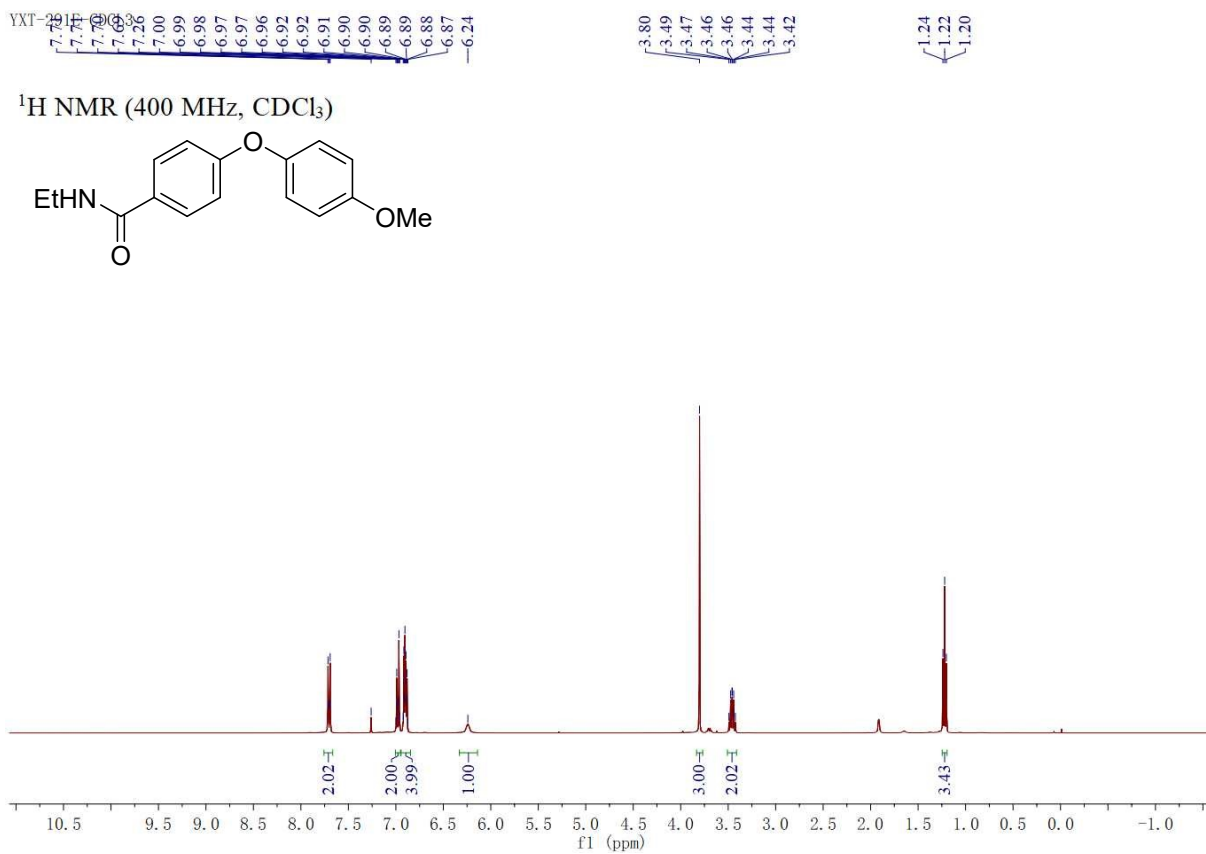

YXT-291E-CDCl<sub>3</sub>

166.98  
161.42  
156.55  
149.09  
128.79  
121.49  
116.79  
115.13  
77.48  
77.16  
76.84  
55.75  
35.01  
15.02

<sup>13</sup>C NMR (101 MHz, CDCl<sub>3</sub>)

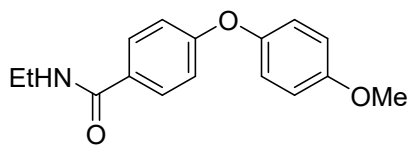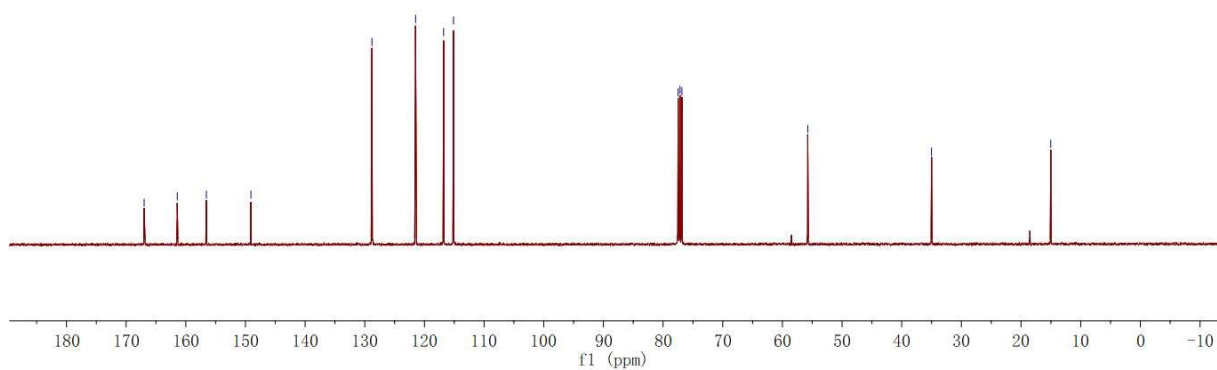

YXT-279A-CDCl<sub>3</sub>

7.23  
7.23  
7.22  
7.21  
7.20  
6.96  
6.95  
6.94  
6.93  
6.93  
6.92  
6.88  
6.87  
6.87  
6.86  
6.85  
6.85  
6.84  
6.84  
6.83  
6.82  
3.78  
1.56

<sup>1</sup>H NMR (400 MHz, CDCl<sub>3</sub>)

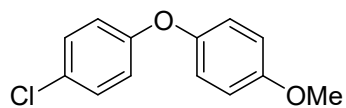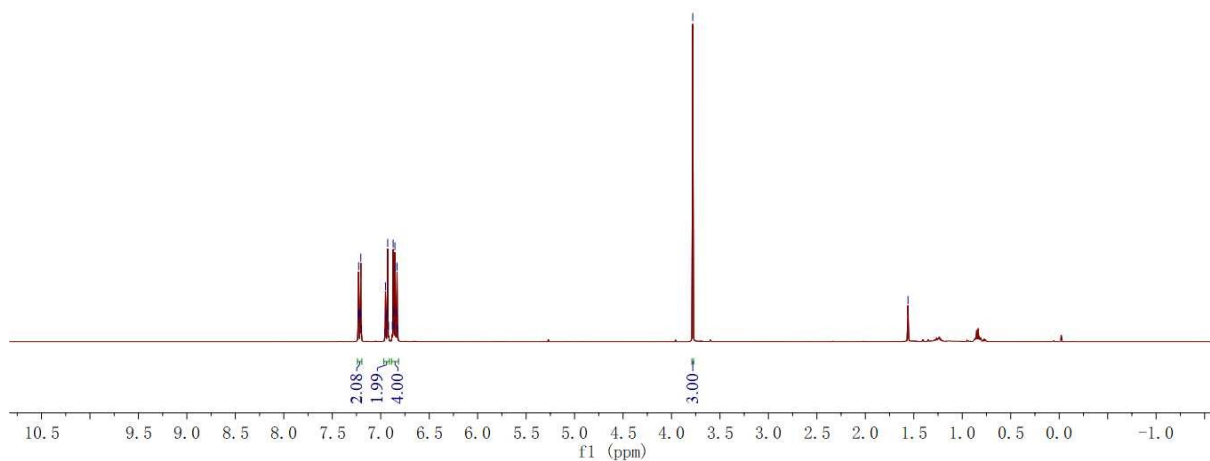



YXT-279A-CDCl<sub>3</sub>-C

157.35  
156.28  
149.91  
129.68  
127.48  
120.97  
118.89  
115.10  
77.48  
77.16  
76.84  
55.79

<sup>13</sup>C NMR (101 MHz, CDCl<sub>3</sub>)

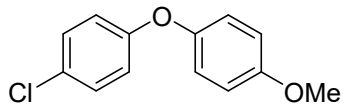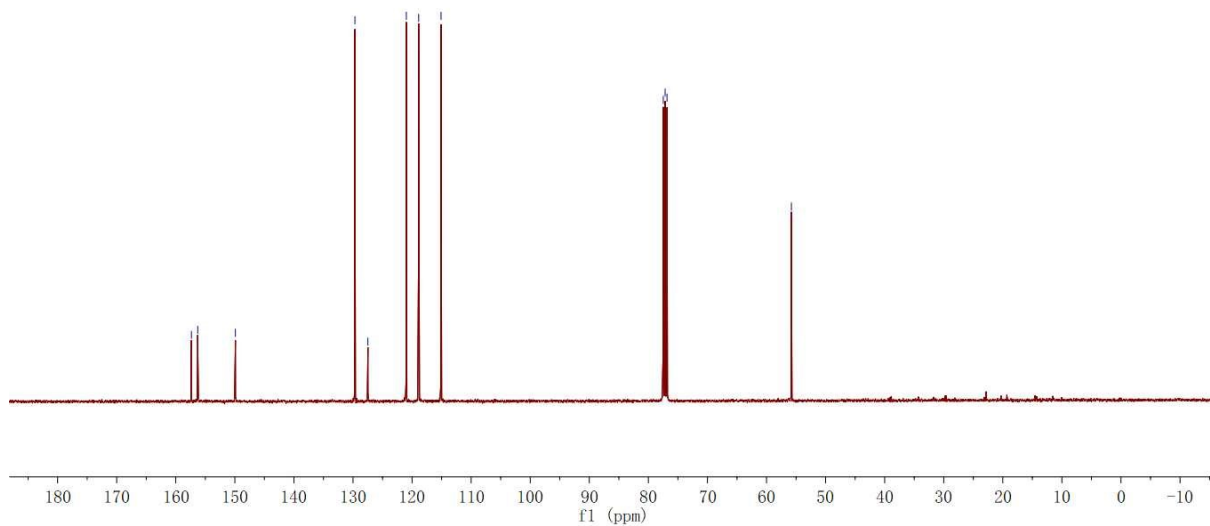

0824-yxt-351-b-h

7.86  
7.85  
7.85  
7.84  
7.83  
7.82  
7.26  
7.03  
7.03  
7.02  
7.01  
7.01  
7.00  
6.99  
6.95  
6.94  
6.94  
6.92  
6.92  
6.91  
3.82  
3.03

<sup>1</sup>H NMR (400 MHz, CDCl<sub>3</sub>)

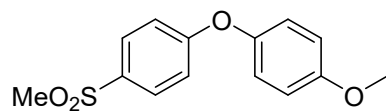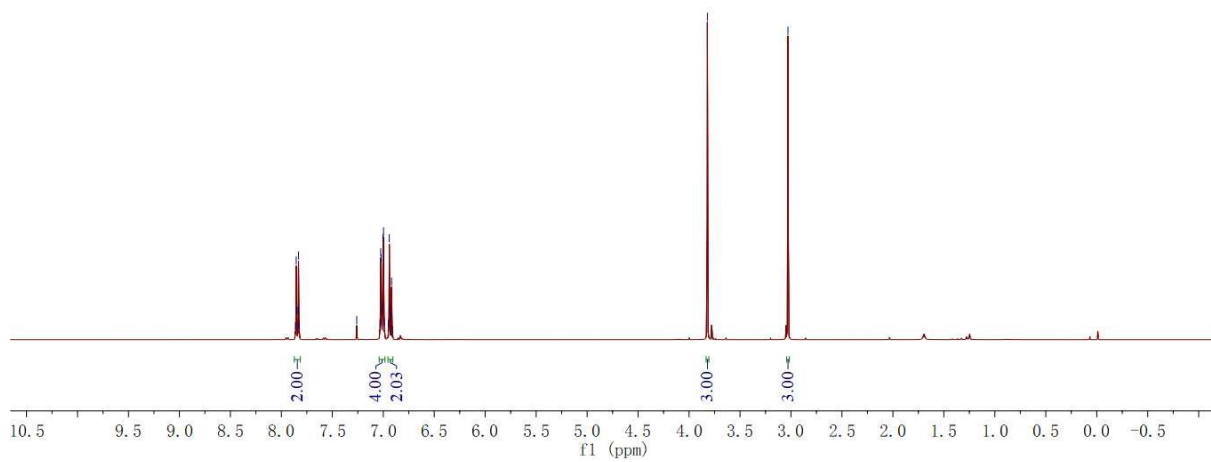

0824-yxt-351-b-c

163.44  
157.11  
148.07  
133.64  
129.72  
121.90  
117.03  
115.35

77.48  
77.16  
76.84

55.77

44.89

$^{13}\text{C}$  NMR (101 MHz,  $\text{CDCl}_3$ )

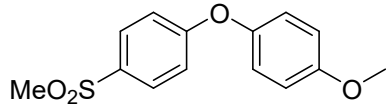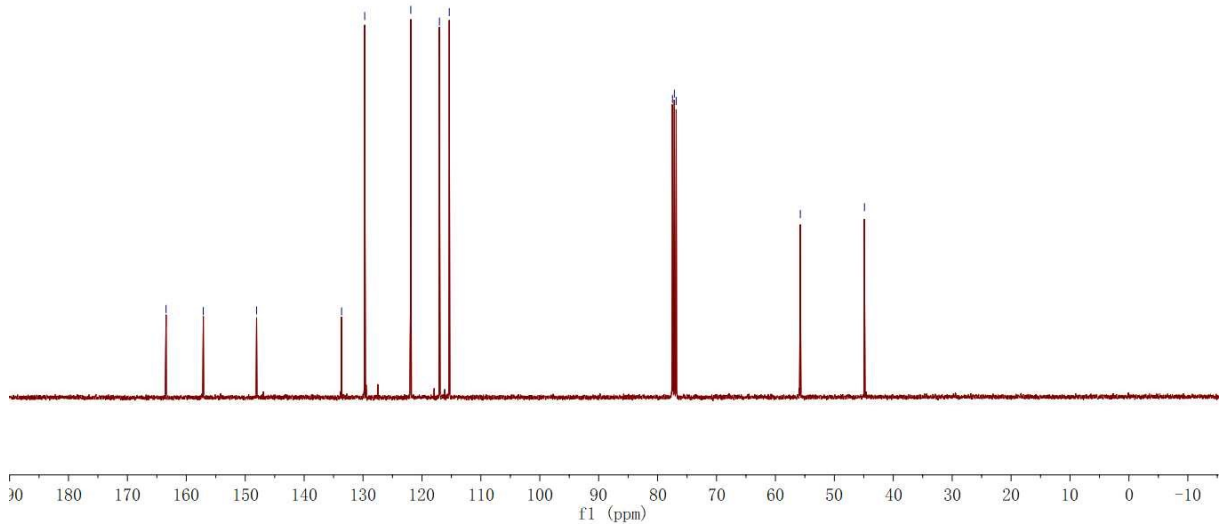

YXT-673A-CDCL3-0709

7.90  
7.88  
7.26  
7.01  
7.01  
7.00  
6.98  
6.97  
6.93  
6.91  
6.91  
6.90  
6.89  
6.88

3.80

2.53

$^1\text{H}$  NMR (400 MHz,  $\text{CDCl}_3$ )

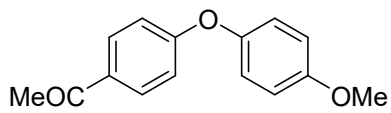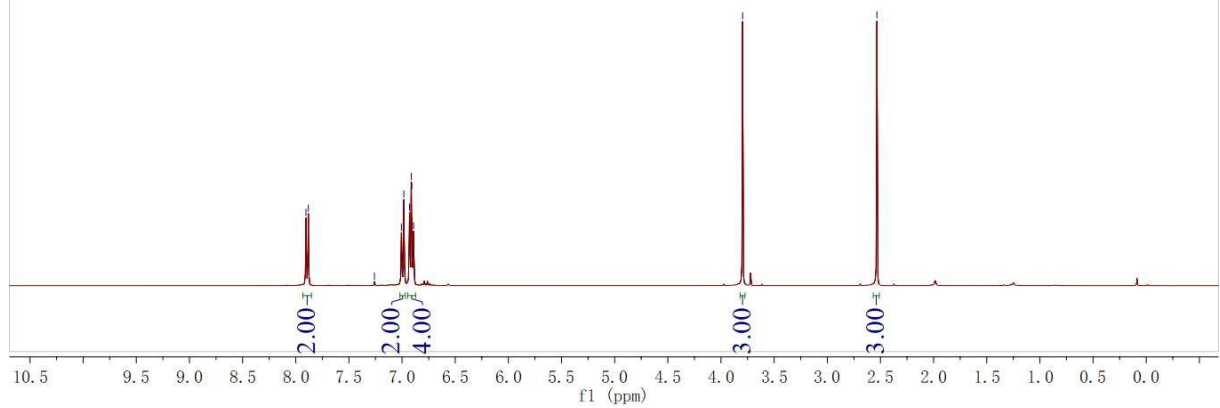

YXT-673A-CDCl<sub>3</sub>-C-0709

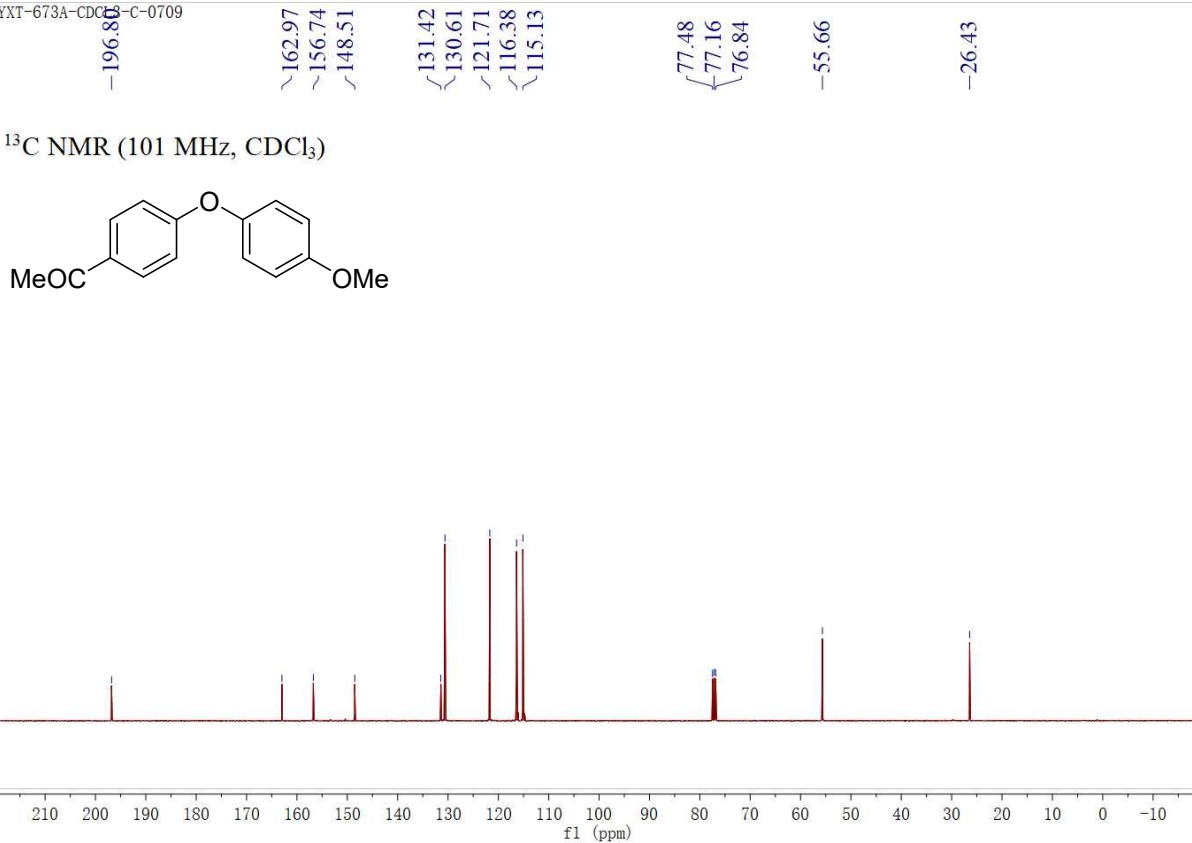

YXT-304D-CDCl<sub>3</sub>

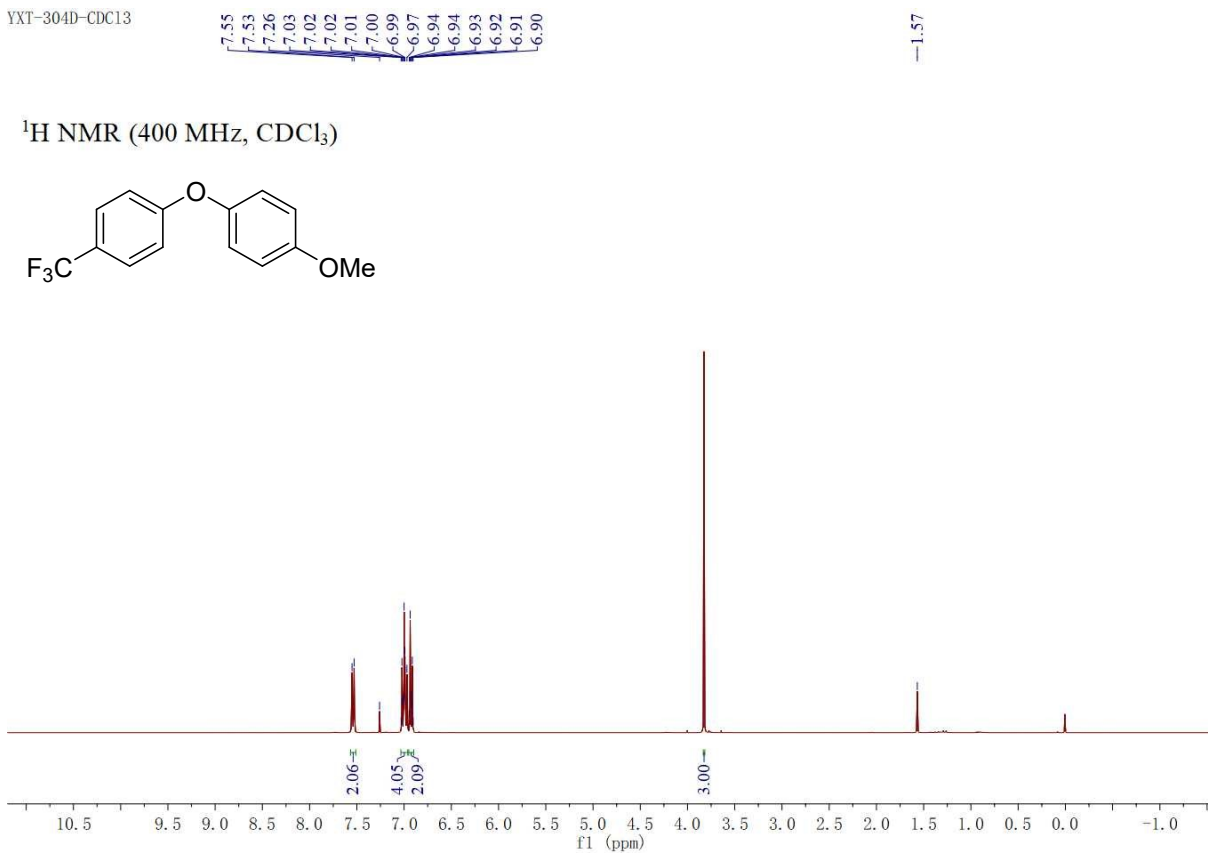

YXT-304D-CDCL3-F

-61.66

$^{19}\text{F}$  NMR (376 MHz,  $\text{CDCl}_3$ )

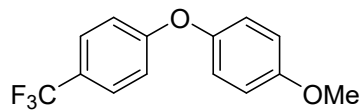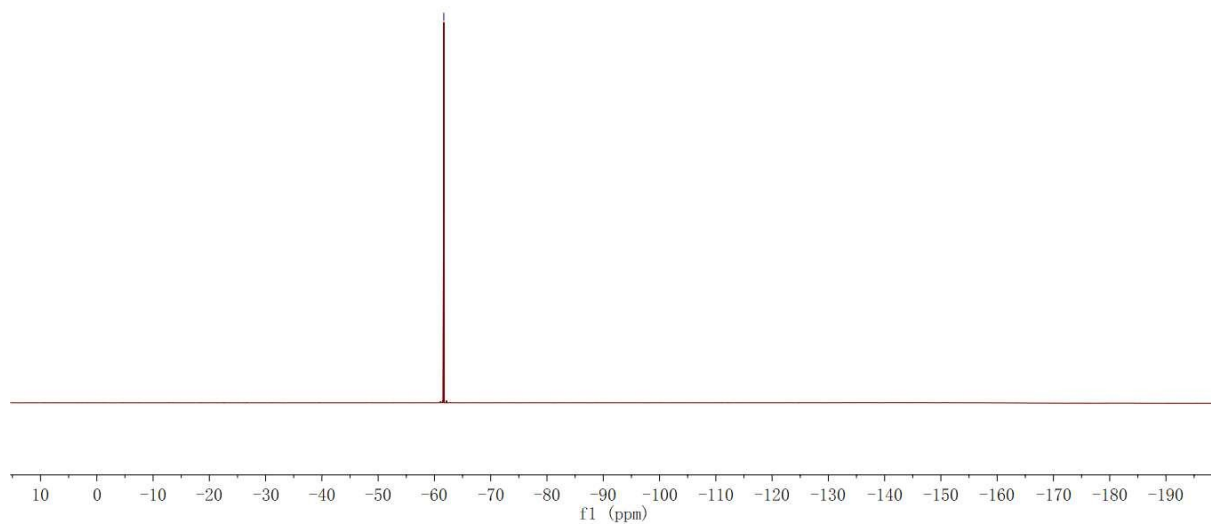

YXT-304D-CDLC3-C

-161.67

-156.80

-148.82

-128.46

-127.21

-127.17

-127.13

-127.10

-125.77

-124.85

-124.52

-124.20

-123.87

-123.07

-121.69

-120.37

-116.95

-115.25

-77.48

-77.16

-76.84

-55.77

$^{13}\text{C}$  NMR (101 MHz,  $\text{CDCl}_3$ )

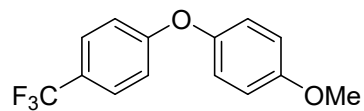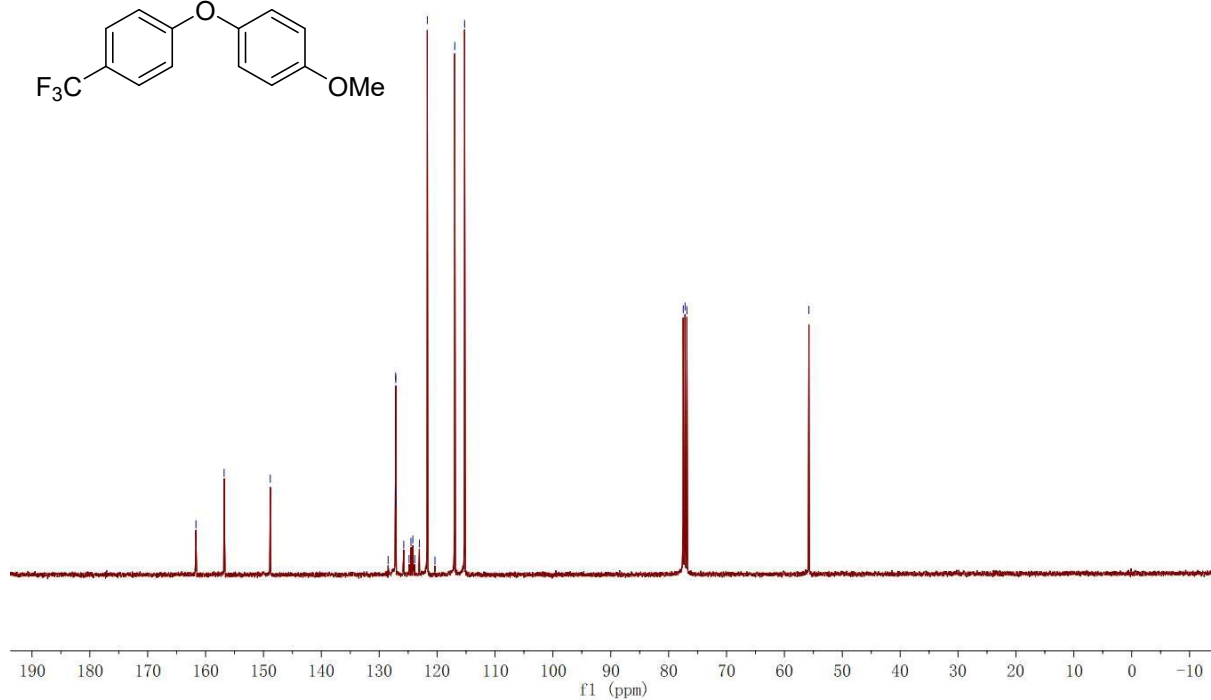

YXT-310A-CDCL3  
7.58  
7.58  
7.57  
7.56  
7.56  
7.55  
7.26  
7.02  
7.01  
7.00  
6.99  
6.98  
6.97  
6.96  
6.95  
6.95  
6.94  
6.94  
6.93  
6.93  
6.92  
6.91  
6.91

-3.82

<sup>1</sup>H NMR (400 MHz, CDCl<sub>3</sub>)

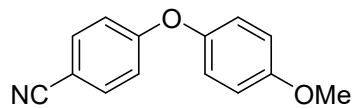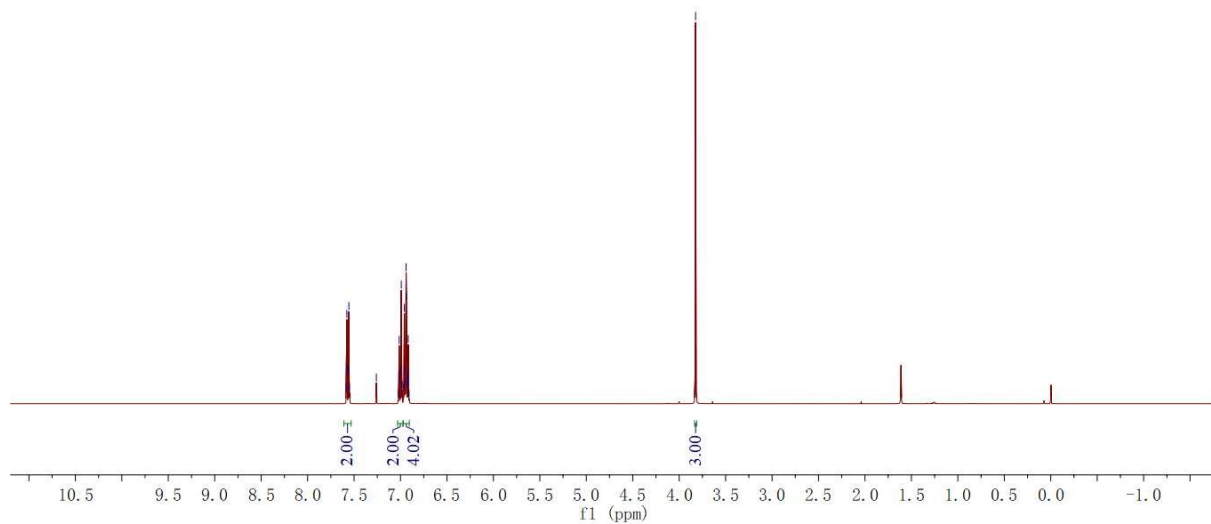

YXT-310A-CDCL3-C

-162.63  
-157.13  
-147.98  
-134.19  
-121.93  
-119.07  
-117.25  
-115.35  
-105.37  
77.48  
77.16  
76.84  
-55.79

<sup>13</sup>C NMR (101 MHz, CDCl<sub>3</sub>)

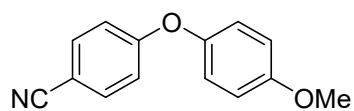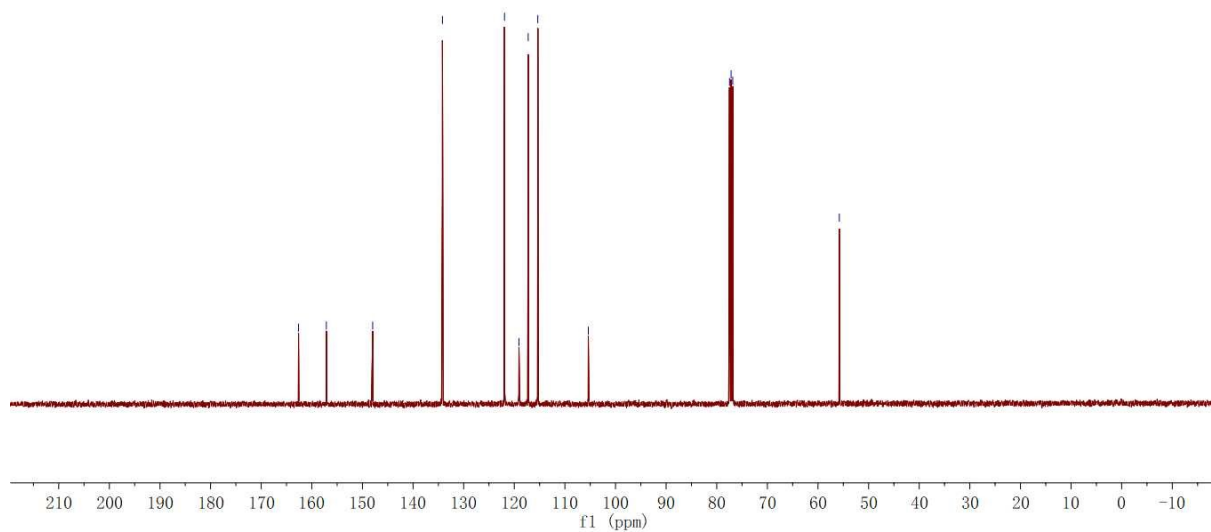

YXT-351C-CDCl<sub>3</sub>-C  
7.84, 7.82, 7.70, 7.68, 7.48, 7.46, 7.44, 7.42, 7.40, 7.31, 7.30, 7.28, 7.26, 7.23, 7.23, 7.11, 7.10, 7.09, 7.08, 7.08, 6.97, 6.95, 3.85

<sup>1</sup>H NMR (400 MHz, CDCl<sub>3</sub>)

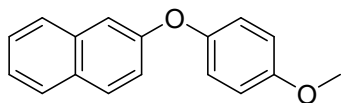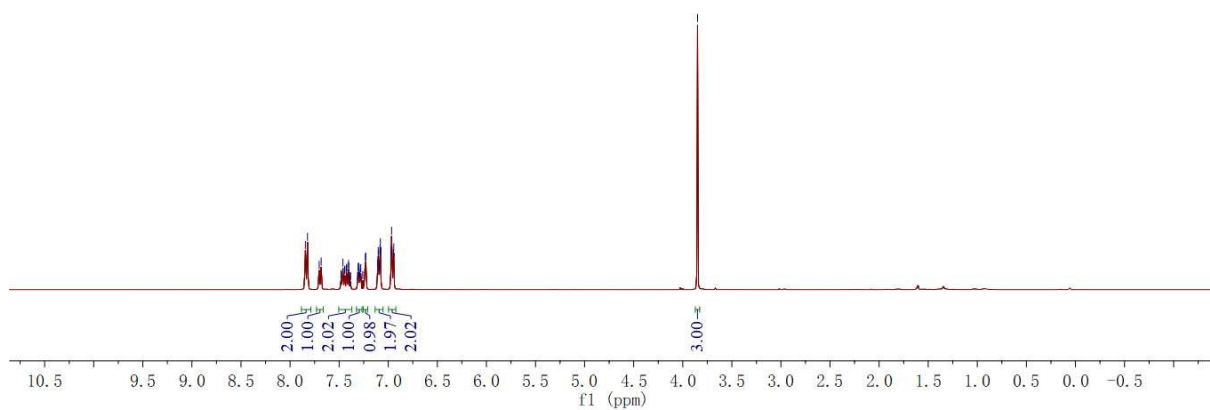

YXT-351C-CDCl<sub>3</sub>-C

156.57, 156.18, 150.14, 134.45, 129.87, 127.81, 127.12, 126.58, 124.48, 121.16, 119.45, 115.06, 112.33

77.48, 77.16, 76.84, 55.75

<sup>13</sup>C NMR (101 MHz, CDCl<sub>3</sub>)

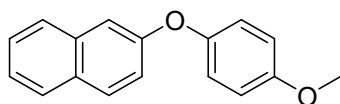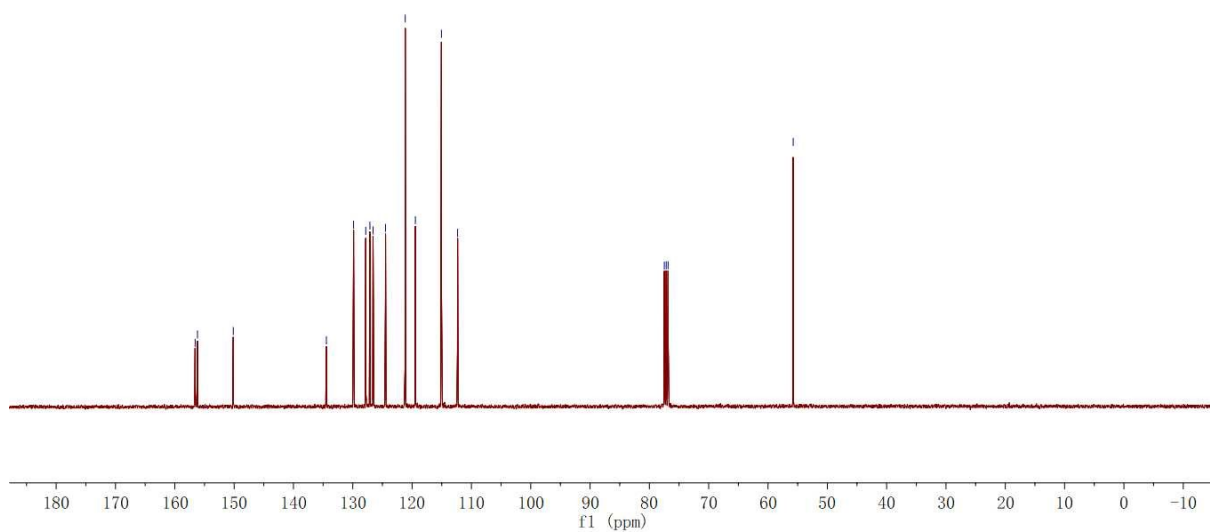

YXT-304C-CDCl<sub>3</sub>

8.80  
8.80  
8.79  
8.79  
8.07  
8.05  
7.95  
7.49  
7.48  
7.47  
7.46  
7.35  
7.34  
7.33  
7.32  
7.09  
7.08  
7.07  
7.07  
7.06  
7.05  
6.95  
6.94  
6.83

<sup>1</sup>H NMR (400 MHz, CDCl<sub>3</sub>)

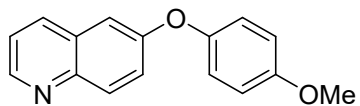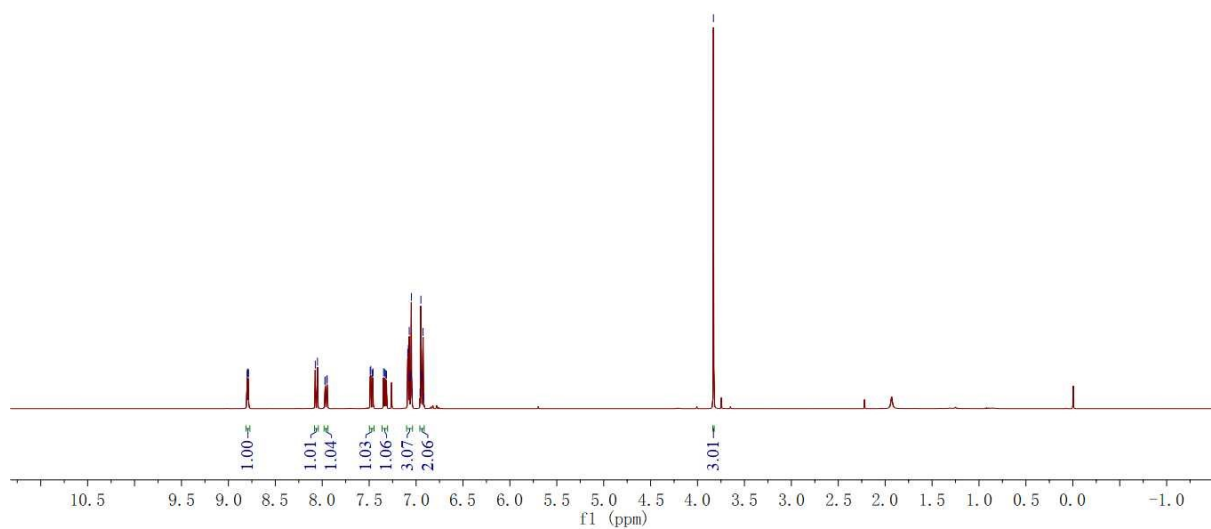

YXT-304C-CDCl<sub>3</sub>-C

157.03  
156.54  
149.54  
148.83  
144.95  
135.20  
131.33  
129.22  
122.75  
121.57  
121.51  
115.19  
111.18  
77.48  
77.16  
76.84  
55.79

<sup>13</sup>C NMR (101 MHz, CDCl<sub>3</sub>)

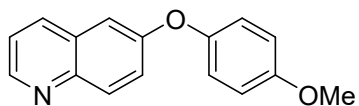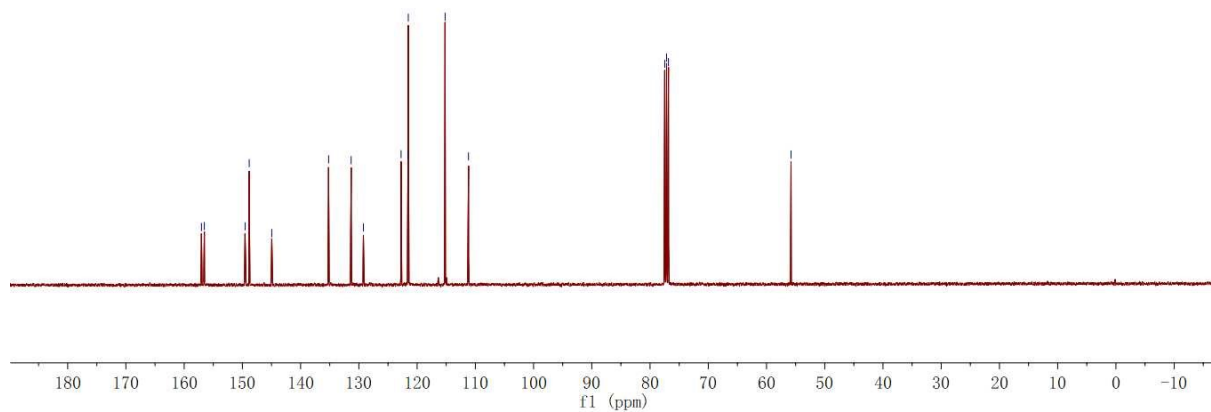

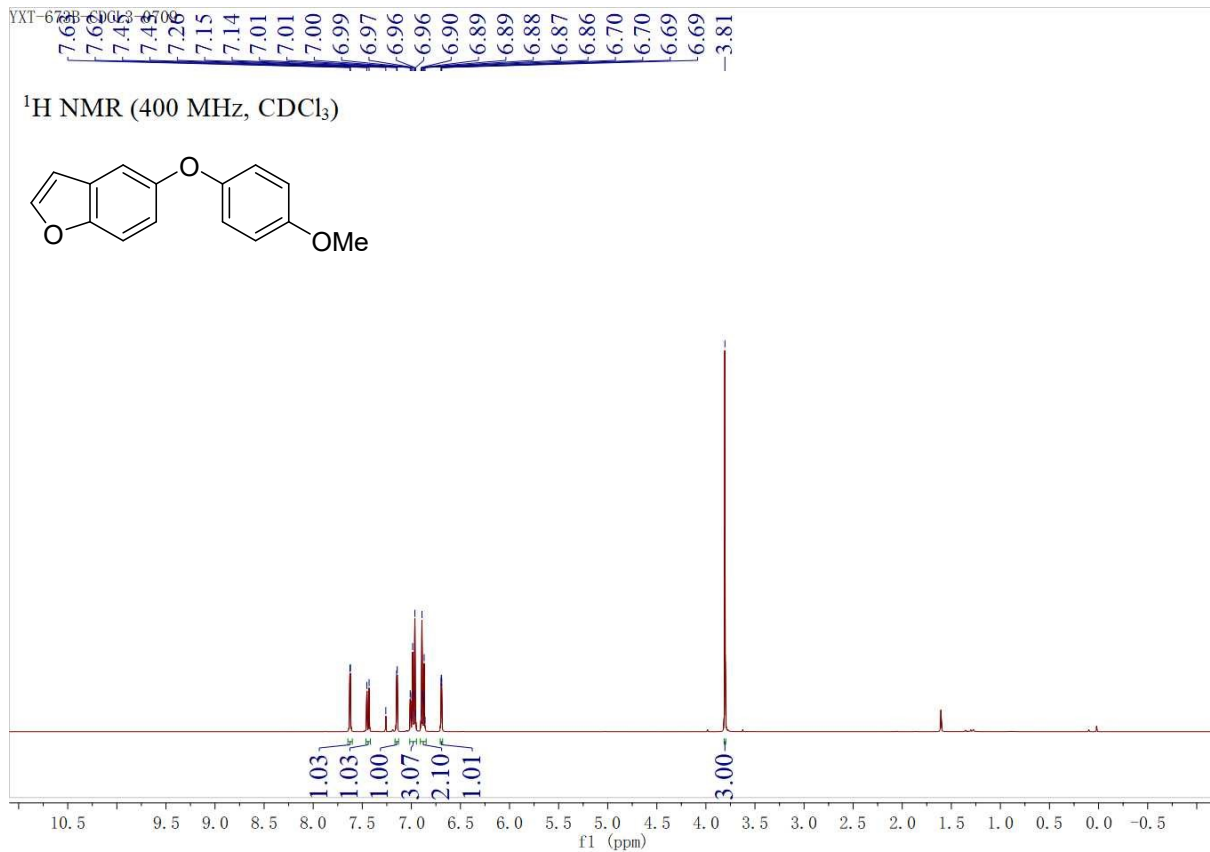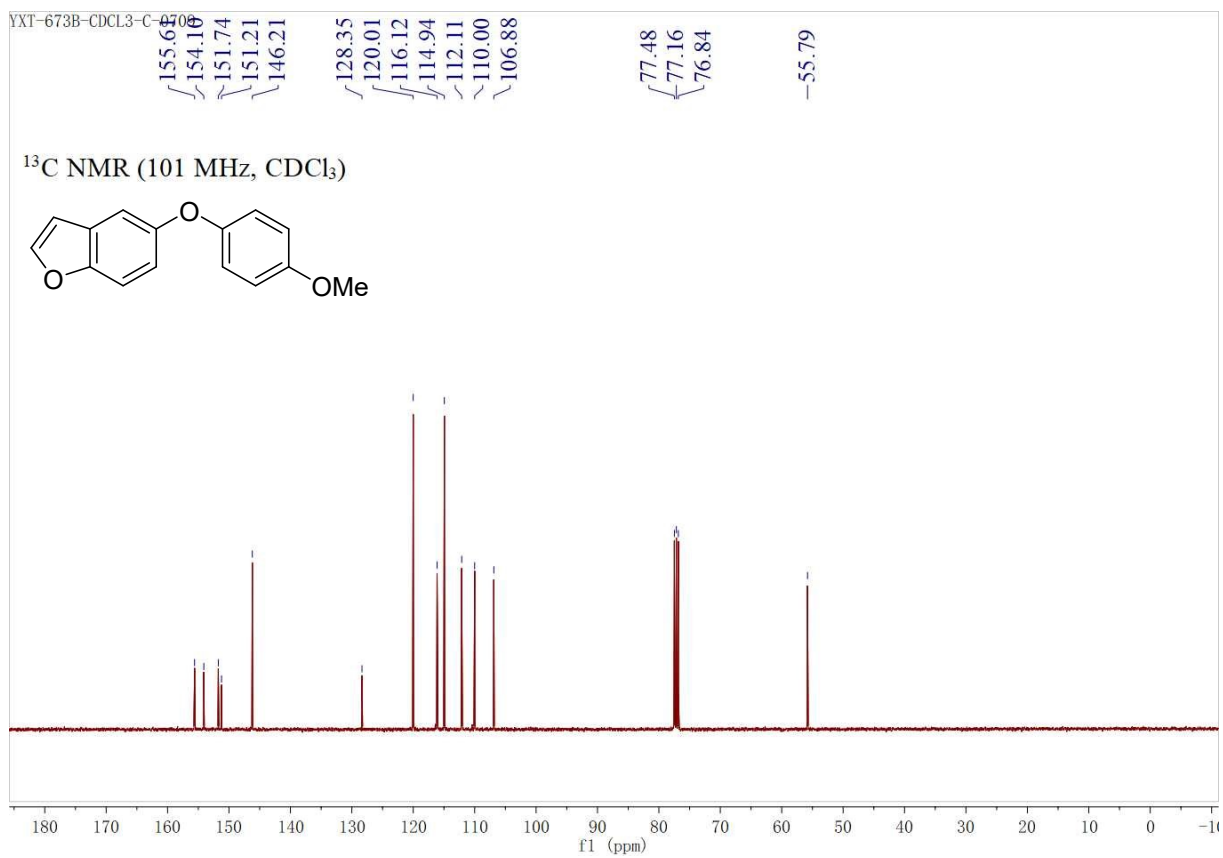



YXT-315C  
 7.80  
 7.78  
 7.46  
 7.45  
 7.32  
 7.32  
 7.26  
 7.22  
 7.21  
 7.10  
 7.09  
 7.07  
 7.07  
 7.03  
 7.02  
 7.02  
 7.01  
 7.00  
 6.99  
 6.92  
 6.91  
 6.91  
 6.89  
 6.89  
 6.88  
 -3.82

<sup>1</sup>H NMR (400 MHz, CDCl<sub>3</sub>)

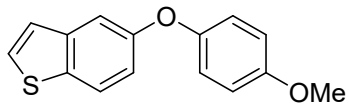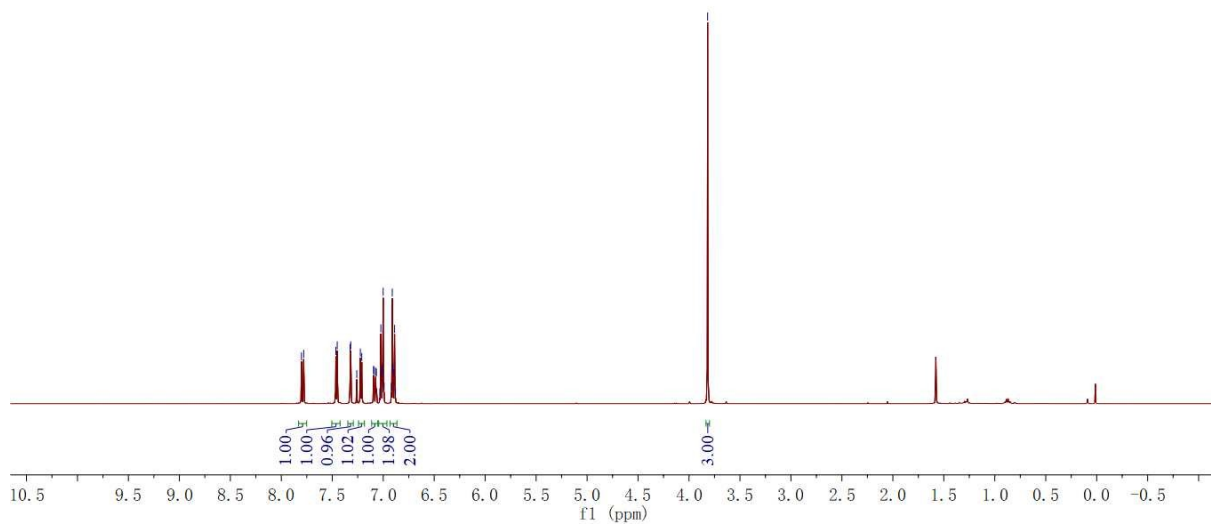

YXT-315C-CDCl<sub>3</sub>-C  
 156.13  
 155.91  
 150.92  
 140.84  
 128.03  
 123.76  
 123.47  
 120.61  
 116.71  
 115.01  
 111.62  
 77.48  
 77.16  
 76.84  
 55.80

<sup>13</sup>C NMR (101 MHz, CDCl<sub>3</sub>)

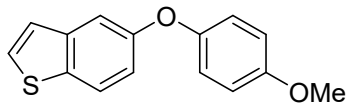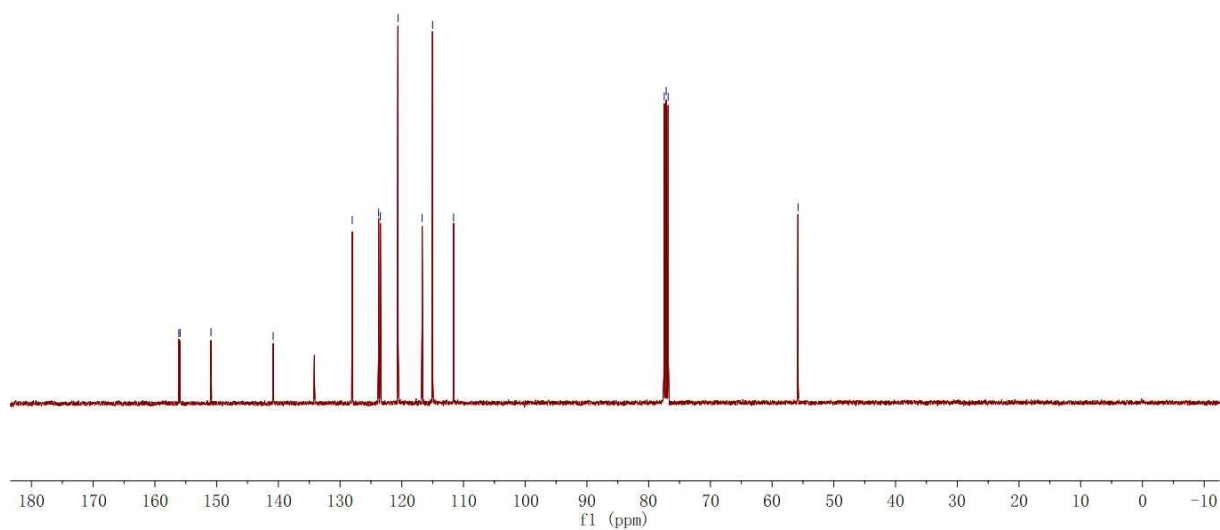

YXT-351E-CDCl<sub>3</sub>

8.72  
8.71  
8.69  
8.69  
8.05  
8.03  
7.56  
7.55  
7.53  
7.53  
7.31  
7.30  
7.26  
7.10  
7.09  
7.09  
7.08  
7.07  
7.06  
6.96  
6.95  
6.95  
6.93  
6.92  
-3.82

<sup>1</sup>H NMR (400 MHz, CDCl<sub>3</sub>)

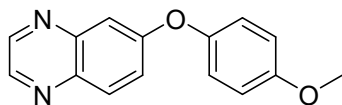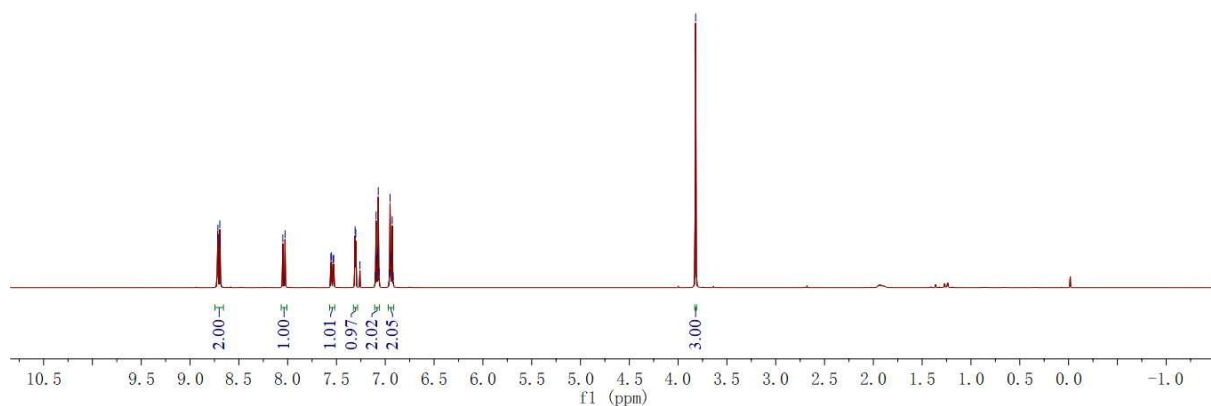

YXT-351E-CDCl<sub>3</sub>-C

160.42  
157.02  
148.57  
145.28  
144.32  
143.14  
139.66  
130.96  
123.31  
121.99  
115.35  
111.88  
77.48  
77.16  
76.84  
55.81

<sup>13</sup>C NMR (101 MHz, CDCl<sub>3</sub>)

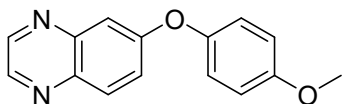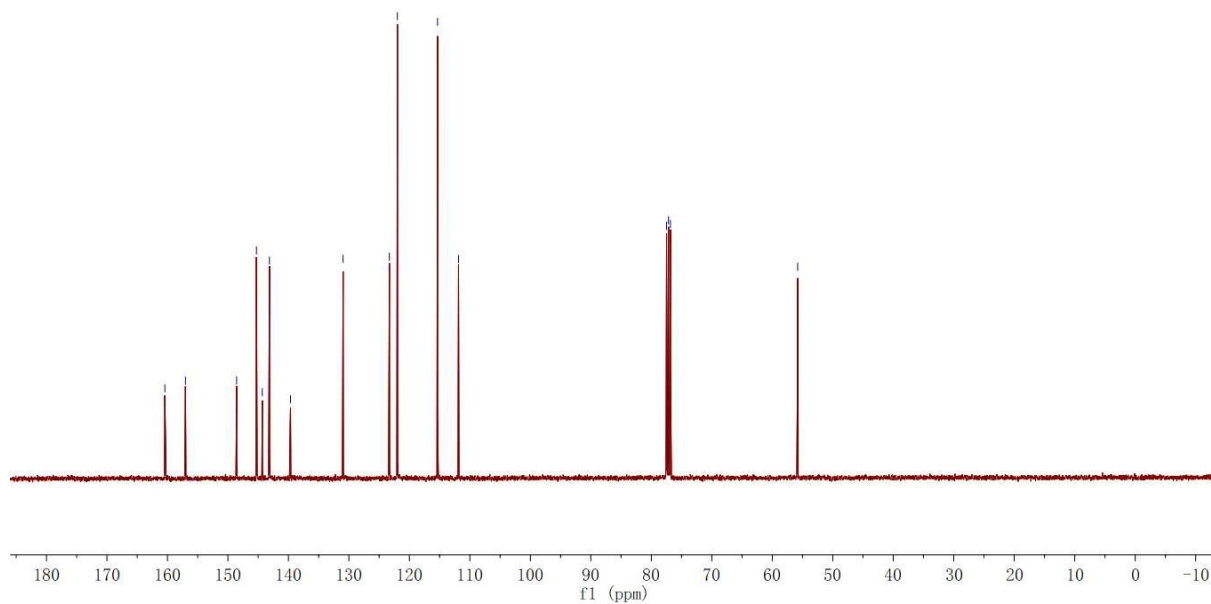

yx  
8.03  
8.03  
7.84  
7.77  
7.67  
7.67  
7.45  
7.45  
7.44  
7.43  
7.42  
7.41  
7.39  
7.37  
7.35  
7.35  
7.34  
7.16  
7.15  
6.71  
6.70

<sup>1</sup>H NMR (400 MHz, CDCl<sub>3</sub>)

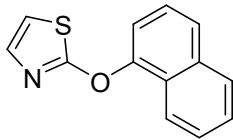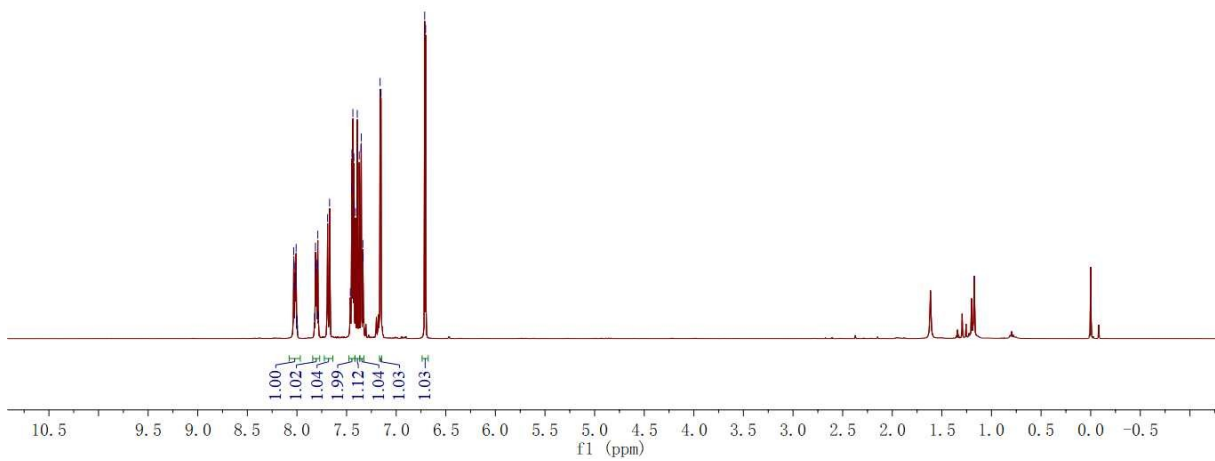

yxt-283B-CHL3-C

174.61  
151.57  
137.82  
135.10  
128.09  
126.94  
126.82  
126.47  
126.29  
125.67  
121.55  
116.41  
113.08  
77.48  
77.16  
76.84

<sup>13</sup>C NMR (101 MHz, CDCl<sub>3</sub>)

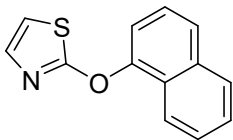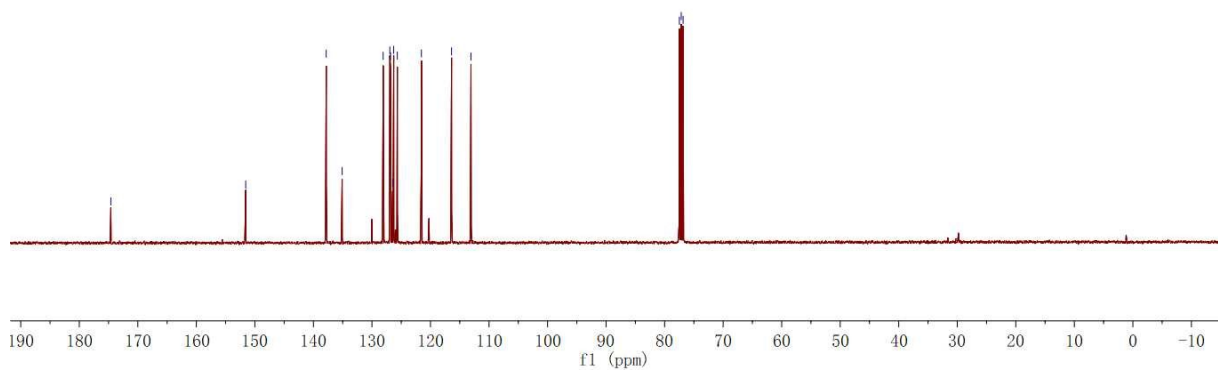

YXT-283A-CDCL3

8.91 8.37 7.30 7.28 7.26 7.24 7.22 7.21 7.20 7.17 7.15 7.13 7.11 6.95 6.94 6.92 -2.22

$^1\text{H}$  NMR (400 MHz,  $\text{CDCl}_3$ )

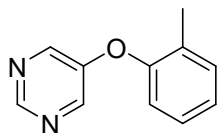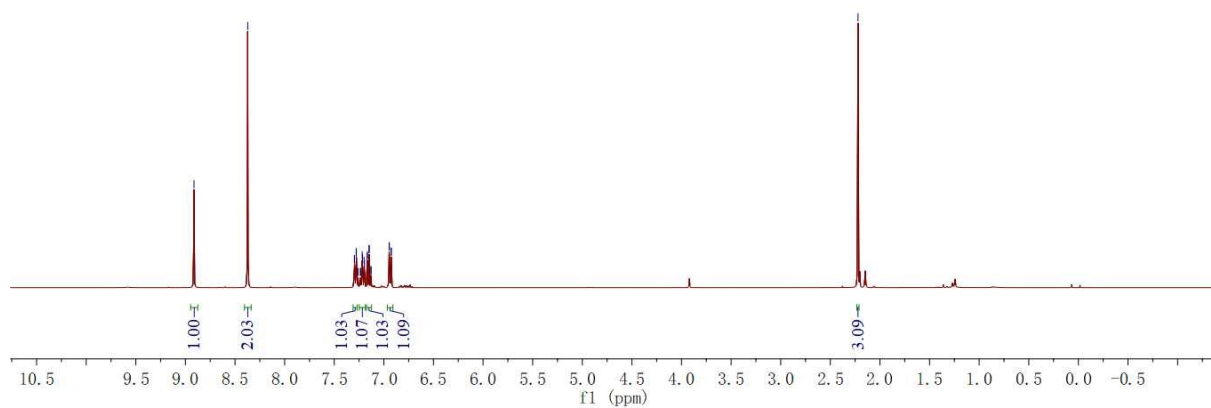

YXT-283A-CDCL3-C

152.69 145.76 132.15 129.95 127.82 125.73 119.73 77.48 77.16 76.84 16.09

$^{13}\text{C}$  NMR (101 MHz,  $\text{CDCl}_3$ )

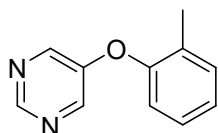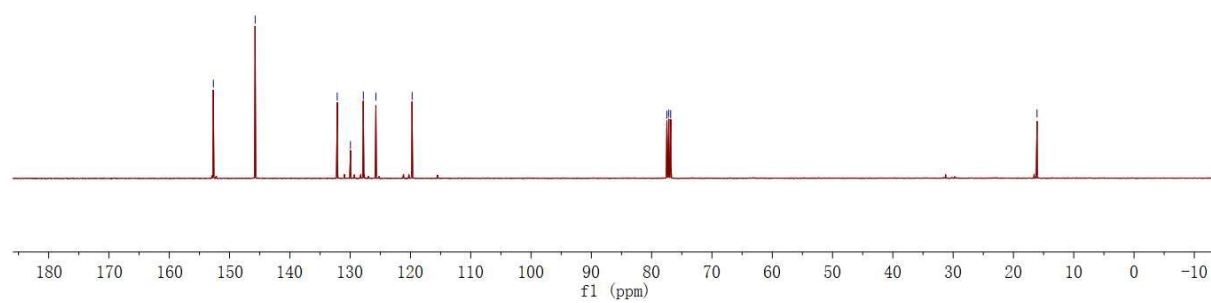

YXT-293A-CDCl<sub>3</sub>

7.17  
7.16  
7.16  
7.14  
7.14  
7.13  
7.09  
7.08  
7.06  
6.85  
6.85  
6.84  
6.82  
6.82

3.74  
3.72  
3.71

2.74  
2.73  
2.71  
2.36

<sup>1</sup>H NMR (400 MHz, CDCl<sub>3</sub>)

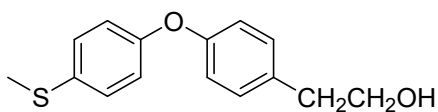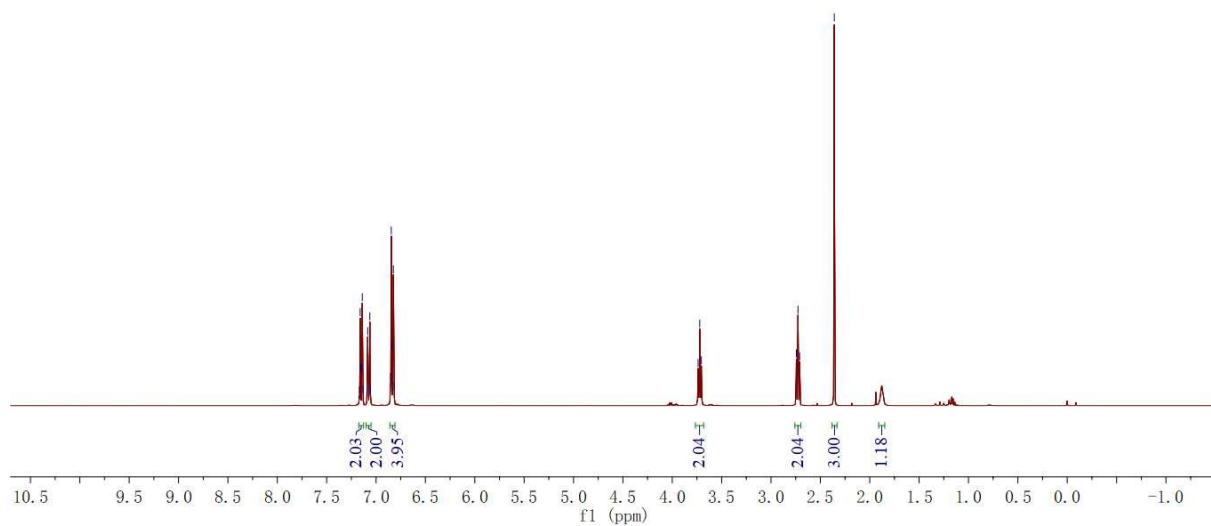

YXT-293A-CDCl<sub>3</sub>-C

155.80  
155.47  
133.54  
132.17  
130.32  
129.24  
119.46  
118.88

77.48  
77.16  
76.84

63.64

38.42

17.18

<sup>13</sup>C NMR (101 MHz, CDCl<sub>3</sub>)

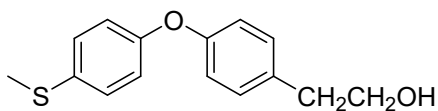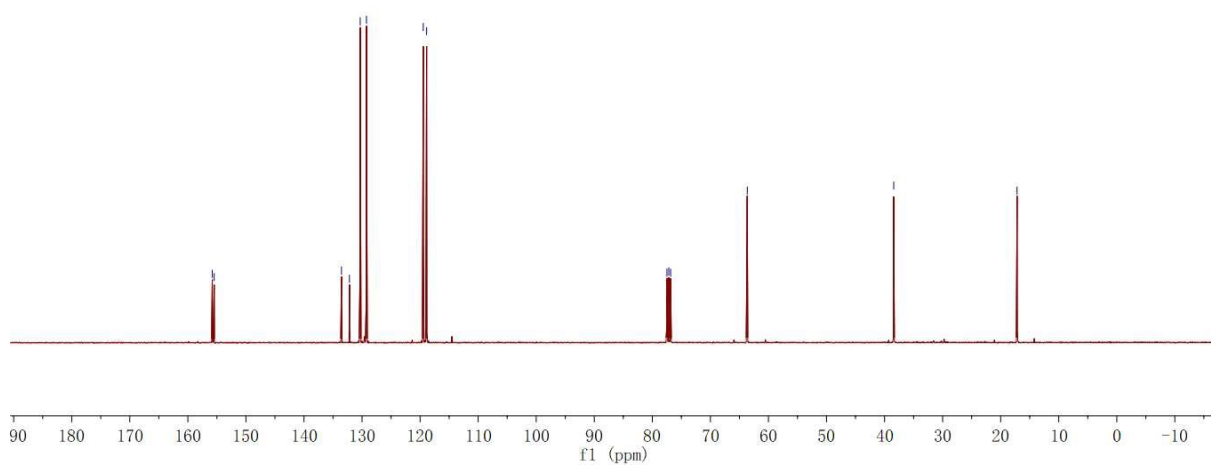

YXT-327B-CDCl<sub>3</sub>

7.23  
7.22  
7.21  
7.20  
7.19  
7.06  
6.74  
6.73  
6.72  
6.71  
6.70  
6.61  
6.60  
6.58  
6.57

3.35  
3.33  
3.31  
2.84  
2.82  
2.80

<sup>1</sup>H NMR (400 MHz, CDCl<sub>3</sub>)

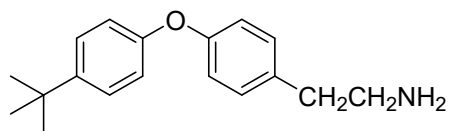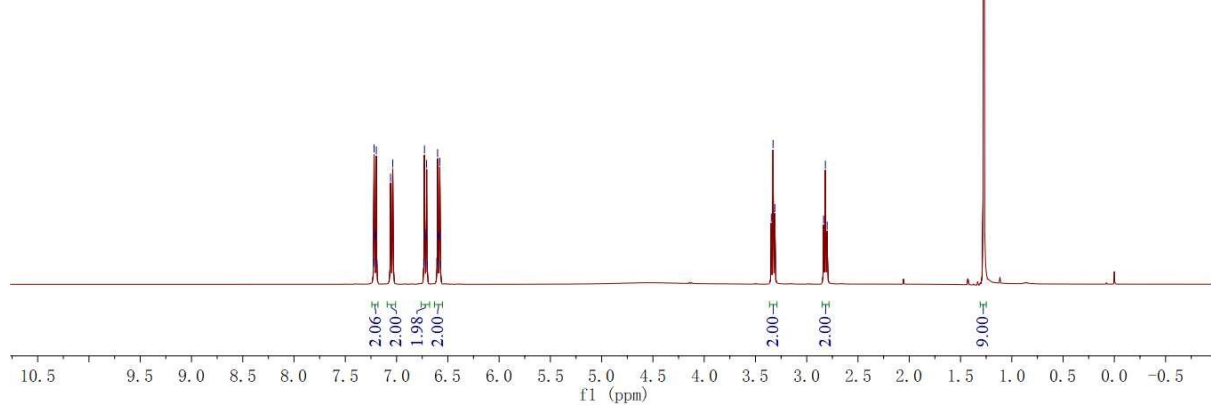

0723-YXT-327-B-C

154.36  
145.52  
141.06  
131.22  
129.99  
126.20  
115.63  
113.51  
113.44

77.48  
77.16  
76.84

45.89

34.67  
34.00  
31.65

<sup>13</sup>C NMR (101 MHz, CDCl<sub>3</sub>)

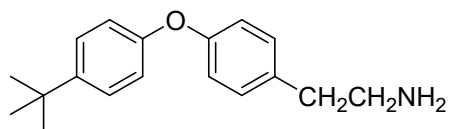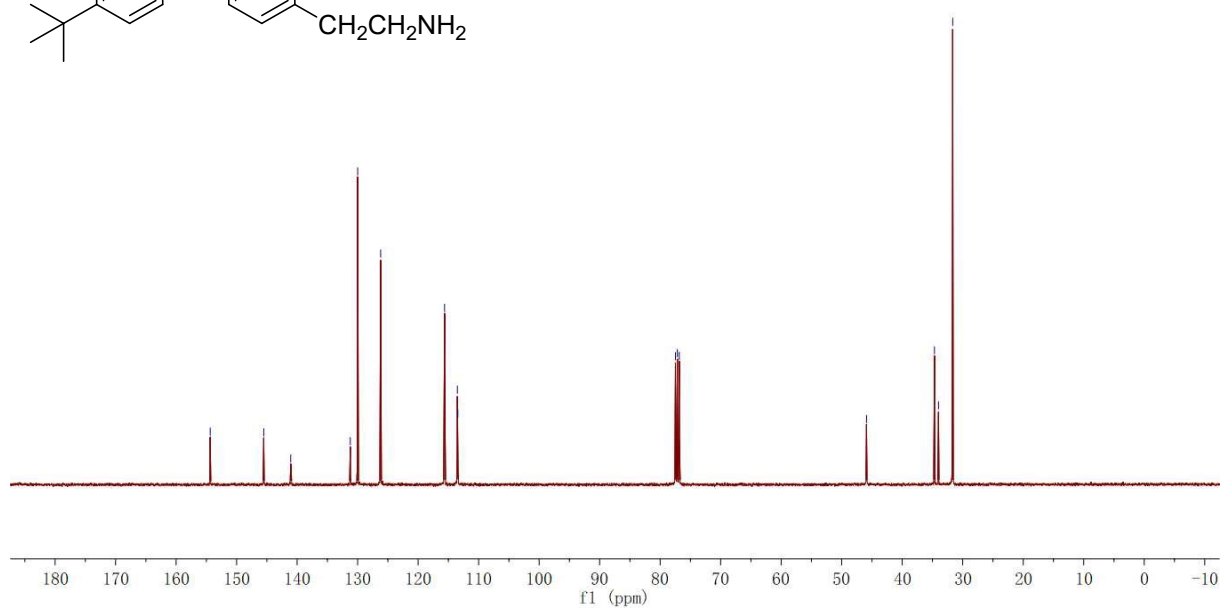

YXT-342E-CDCl<sub>3</sub>

7.26  
7.14  
7.12  
6.92  
6.92  
6.91  
6.90  
6.89  
6.89  
6.88

2.89  
2.87  
2.86  
2.86  
2.77  
2.77  
2.75  
2.74  
2.33  
2.15

<sup>1</sup>H NMR (400 MHz, CDCl<sub>3</sub>)

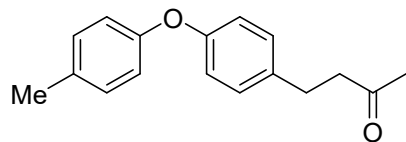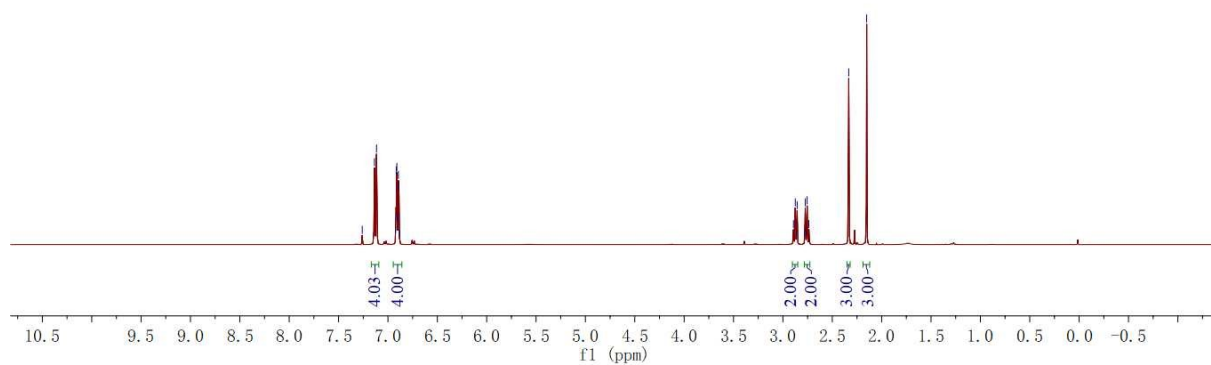

YXT-342E-CDCl<sub>3</sub>-C

208.12

156.11  
155.05

135.55  
132.82

130.30  
129.55

118.96  
118.63

77.48  
77.16  
76.84

45.39

30.20  
29.07

20.79

<sup>13</sup>C NMR (101 MHz, CDCl<sub>3</sub>)

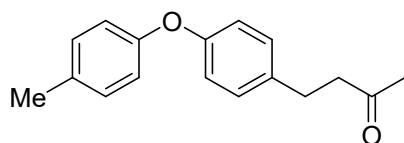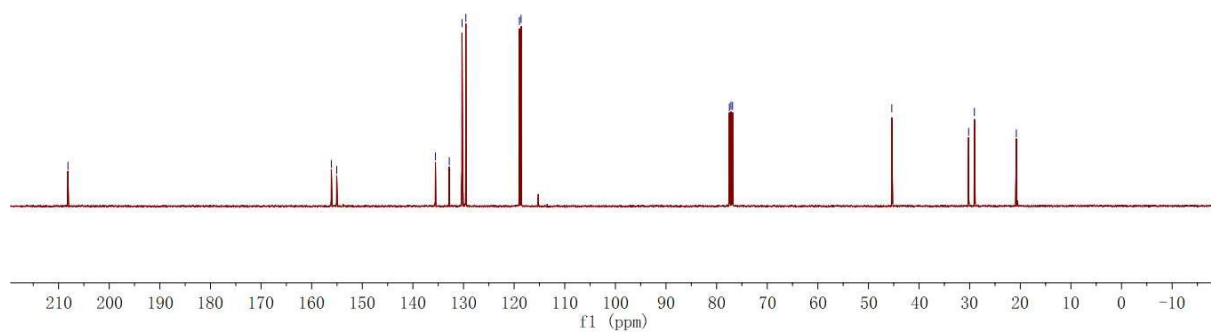

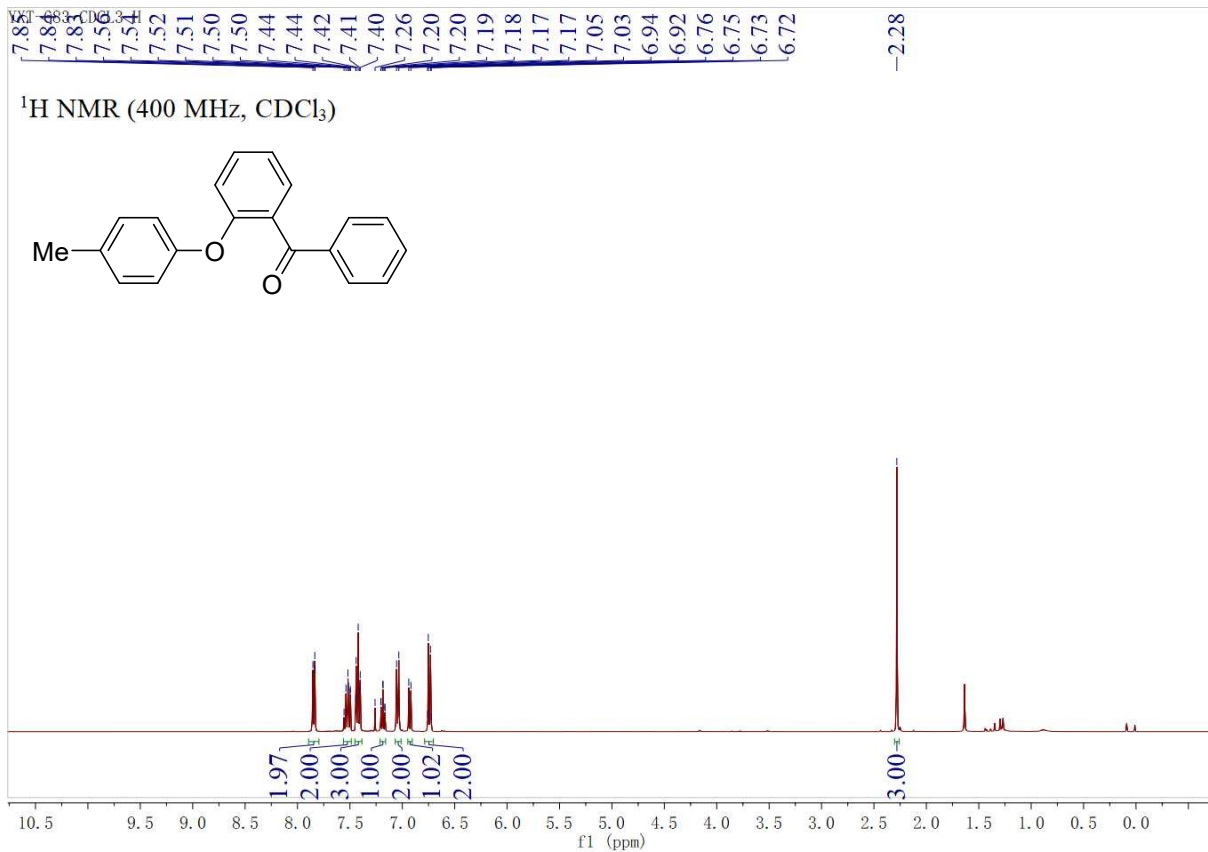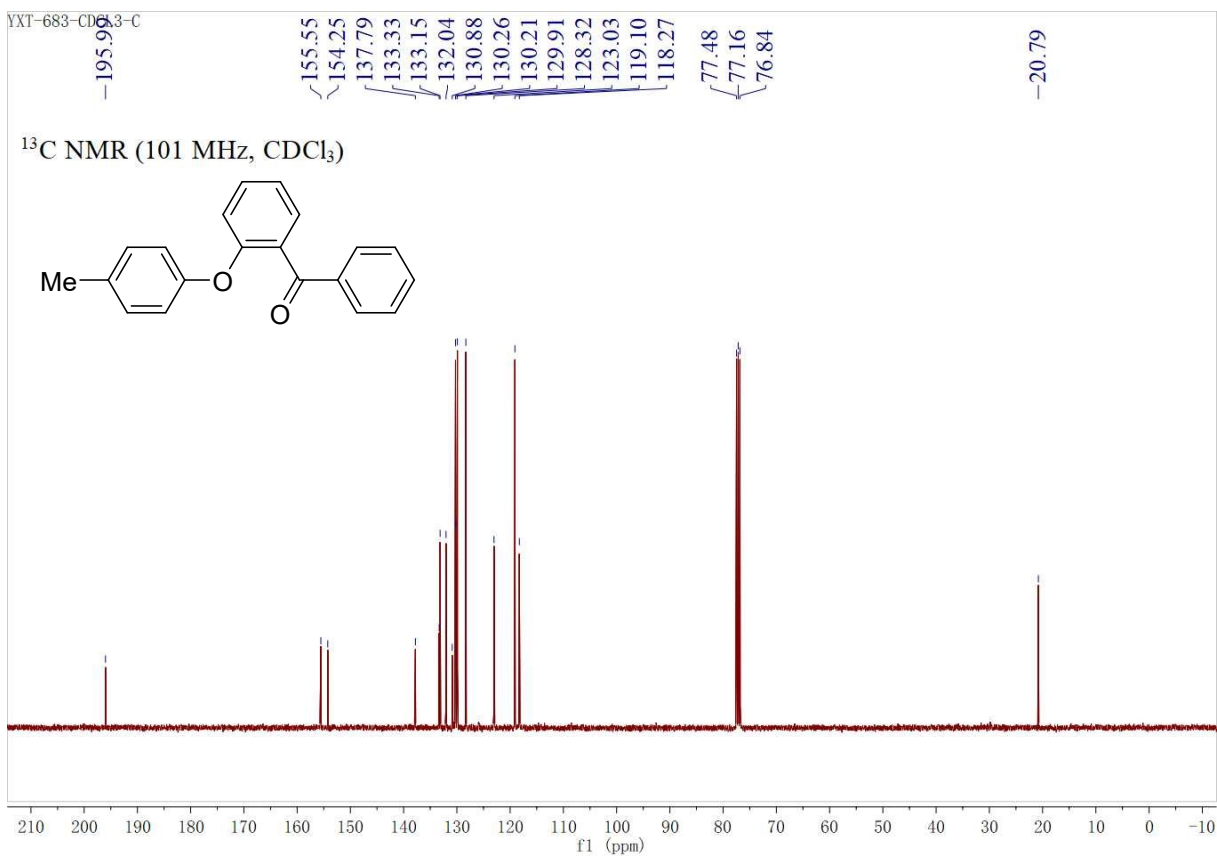



0824-yxt-351-g-h

7.26  
7.05  
7.03  
6.98  
6.96  
6.86  
6.84  
6.78  
6.76

-2.29

$^1\text{H}$  NMR (400 MHz,  $\text{CDCl}_3$ )

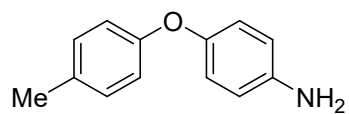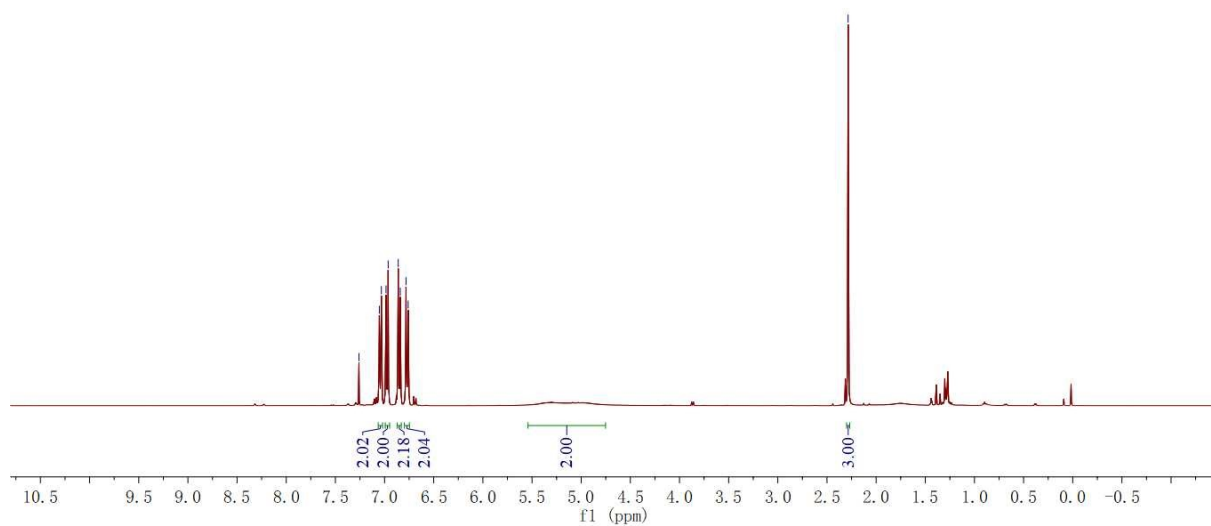

0824-yxt-351-g-c

150.74  
142.53  
136.81  
129.94  
129.53  
121.50  
116.74  
116.22

77.48  
77.16  
76.84

-20.68

$^{13}\text{C}$  NMR (101 MHz,  $\text{CDCl}_3$ )

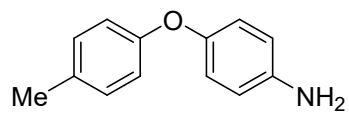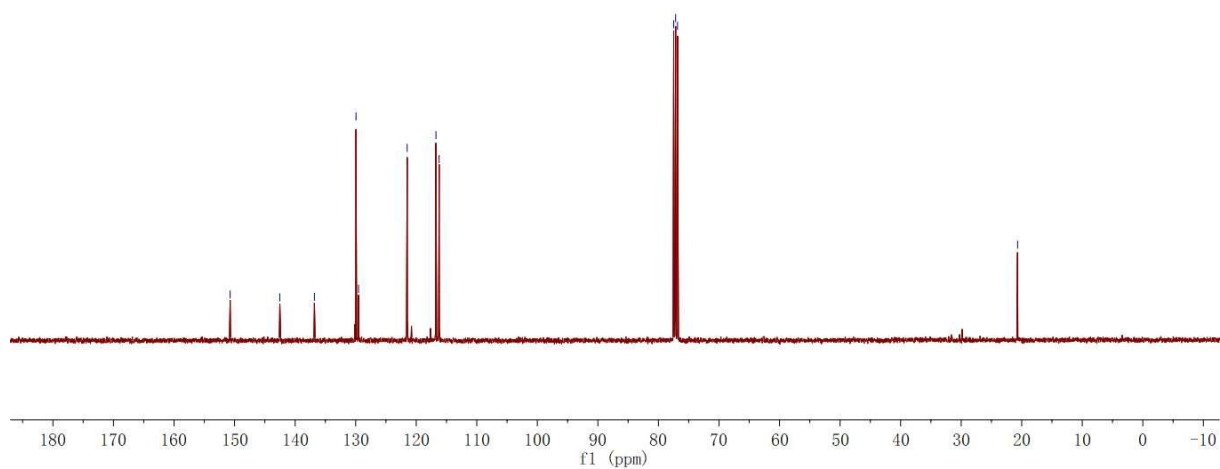

YXT-362G  
 7.66  
 7.66  
 7.66  
 7.64  
 7.64  
 7.64  
 7.56  
 7.56  
 7.55  
 7.42  
 7.40  
 7.38  
 7.26  
 7.19  
 7.19  
 7.18  
 7.17  
 7.17  
 7.15  
 6.94  
 6.94  
 6.93  
 6.92  
 6.91  
 -2.56  
 -2.35

<sup>1</sup>H NMR (400 MHz, CDCl<sub>3</sub>)

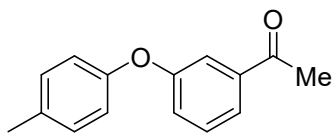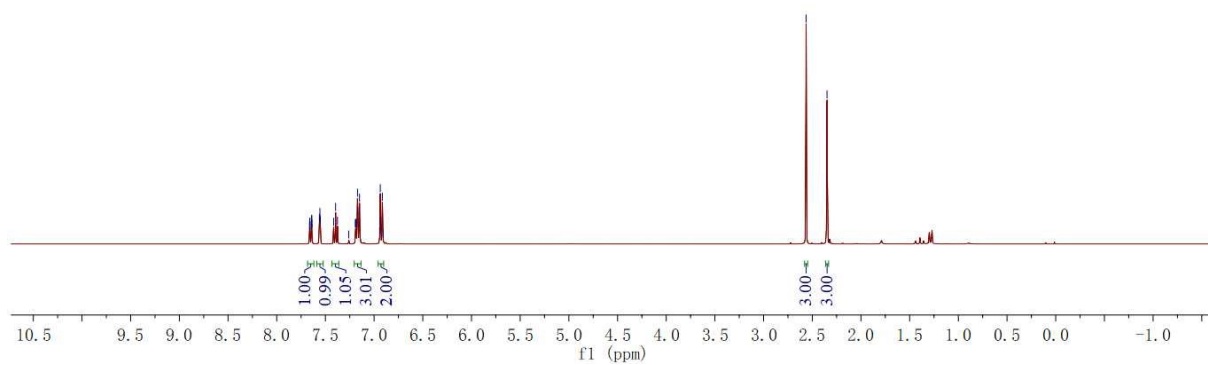

YXT-362G  
 CDCl<sub>3</sub>-C

197.59  
 158.39  
 154.16  
 138.88  
 133.63  
 130.54  
 129.93  
 122.88  
 122.79  
 119.40  
 117.60  
 77.48  
 77.16  
 76.84  
 26.80  
 20.81

<sup>13</sup>C NMR (101 MHz, CDCl<sub>3</sub>)

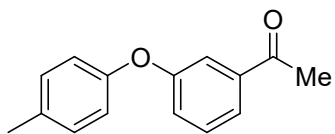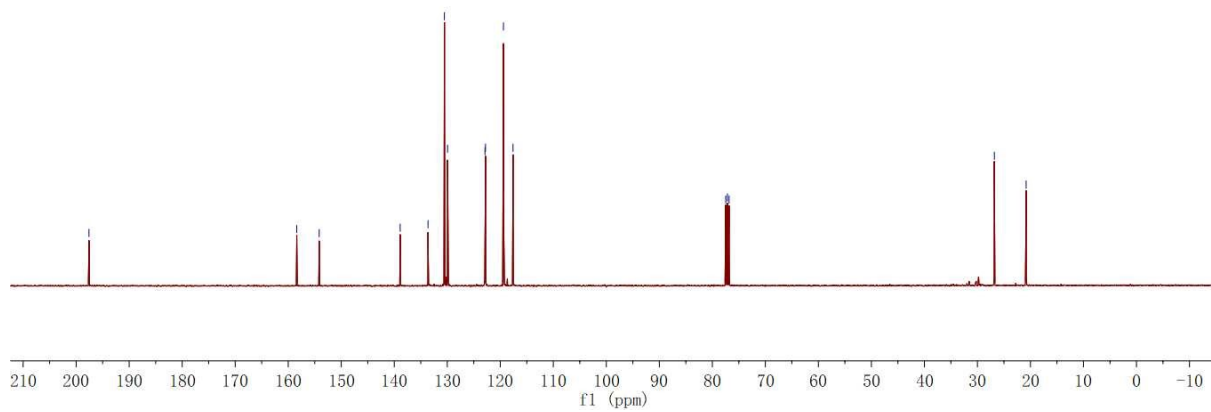

7.26  
7.26  
7.26  
6.98  
6.97  
6.96  
6.89  
6.89  
6.88  
6.87  
6.86  
6.75  
6.73  
6.73  
6.68  
6.68  
3.80  
2.87  
2.85  
2.84  
2.54  
2.52  
2.49  
2.47  
2.38  
2.26  
2.17  
2.15  
2.12  
2.10  
2.05  
2.02  
1.98  
1.98  
1.97  
1.95  
1.95  
1.64  
1.63  
1.62  
1.61  
1.60  
1.59  
1.59  
1.56  
1.55  
1.54  
1.52  
1.51  
1.49  
1.49  
1.48  
1.44  
1.44  
1.43  
0.92

<sup>1</sup>H NMR (400 MHz, CDCl<sub>3</sub>)

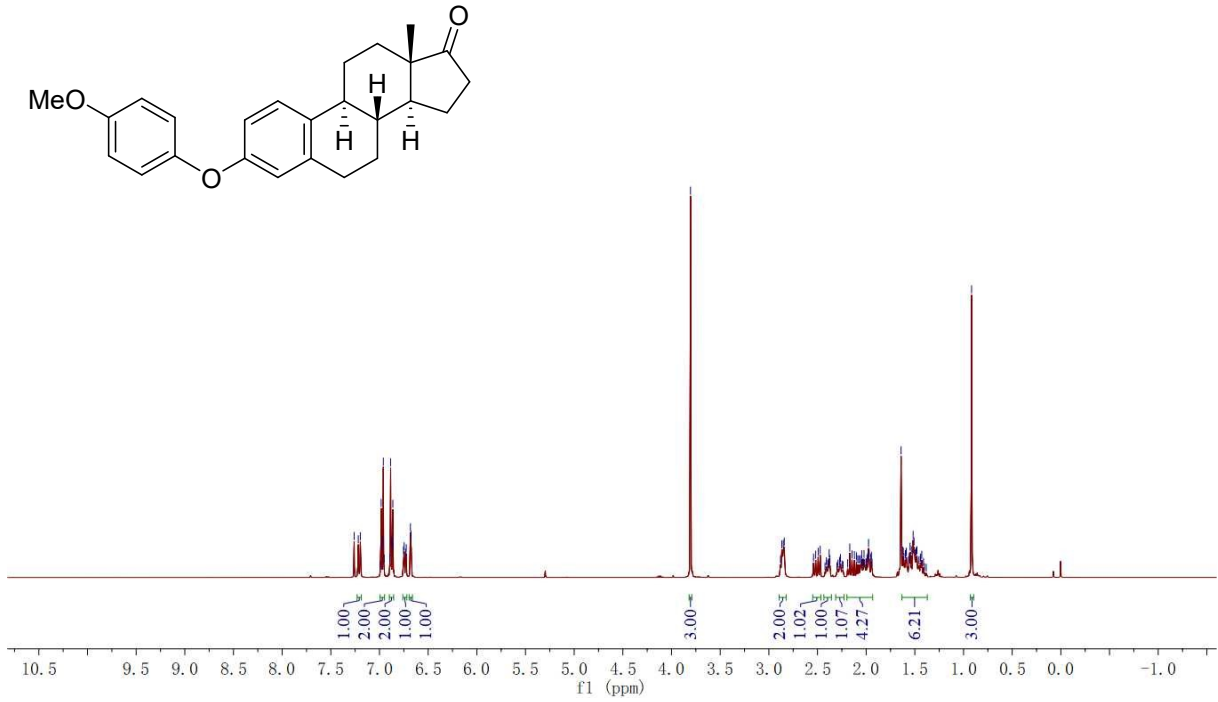

YXT-369A-CDCl<sub>3</sub>

-221.68

156.53

155.88

150.43

138.20

134.03

126.62

120.83

117.73

115.23

114.92

77.48

77.16

76.84

55.78

50.56

48.12

44.19

38.38

35.99

31.70

29.66

26.60

26.01

21.71

13.98

<sup>13</sup>C NMR (101 MHz, CDCl<sub>3</sub>)

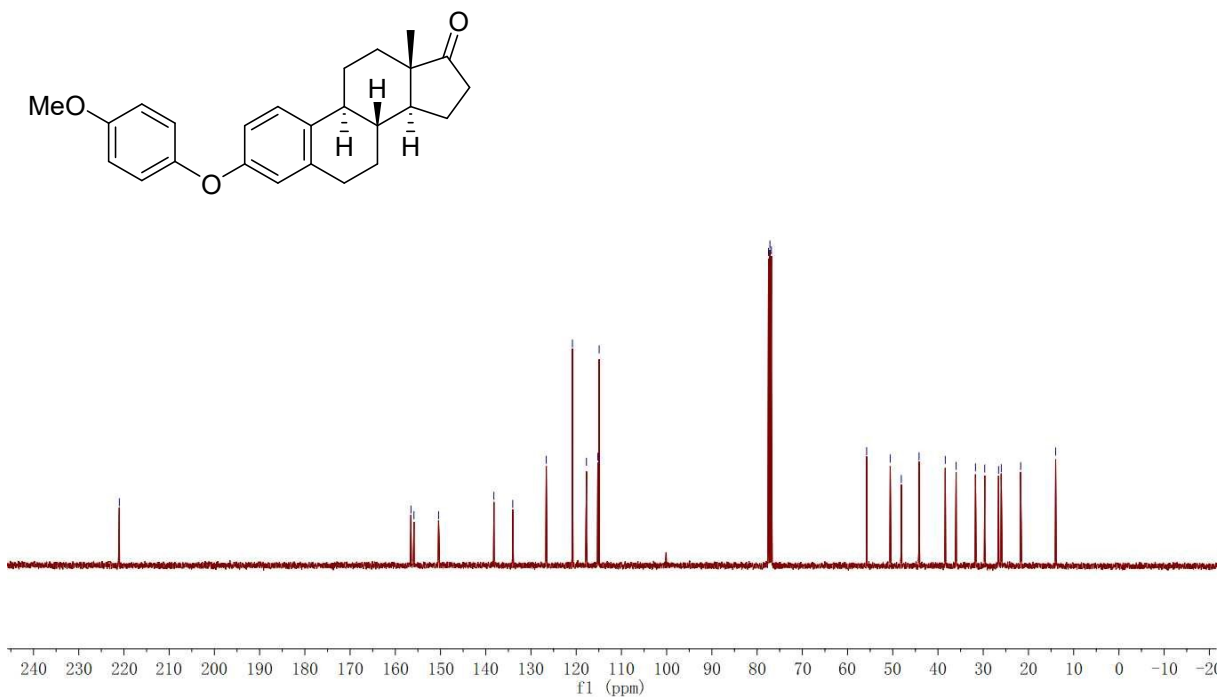

YXT-372B-CDCl<sub>3</sub>  
7.50, 7.50, 7.26, 7.26, 7.23, 7.22, 7.14, 7.12, 7.04, 7.03, 7.03, 6.97, 6.96, 6.95, 6.91, 6.91, 6.89, 6.88, 6.87, 6.87, 6.30, 6.30, 3.80, 3.43, 3.43, 3.41, 3.40, 3.39, 3.38, 3.37, 3.36, 3.35, 1.20, 1.18, 1.16

<sup>1</sup>H NMR (400 MHz, CDCl<sub>3</sub>)

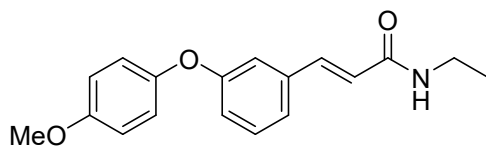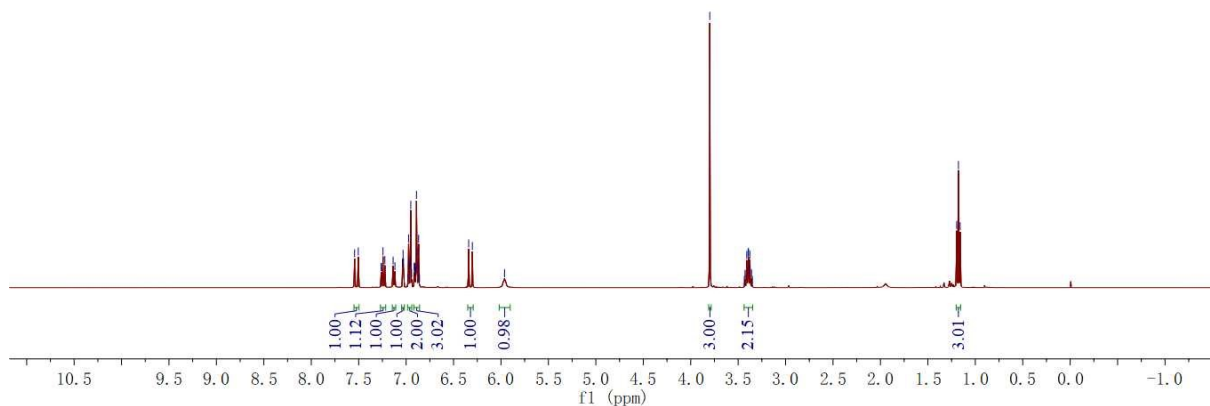

YXT-372B-CDCl<sub>3</sub>-C  
165.78, 159.05, 156.20, 149.74, 140.23, 136.67, 130.07, 122.30, 121.59, 121.09, 118.75, 116.06, 115.07, 77.48, 77.16, 76.84, 55.76, 34.71, 14.93

<sup>13</sup>C NMR (101 MHz, CDCl<sub>3</sub>)

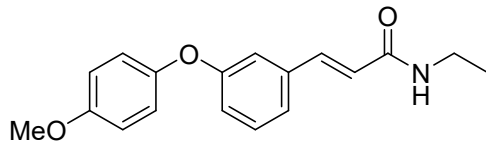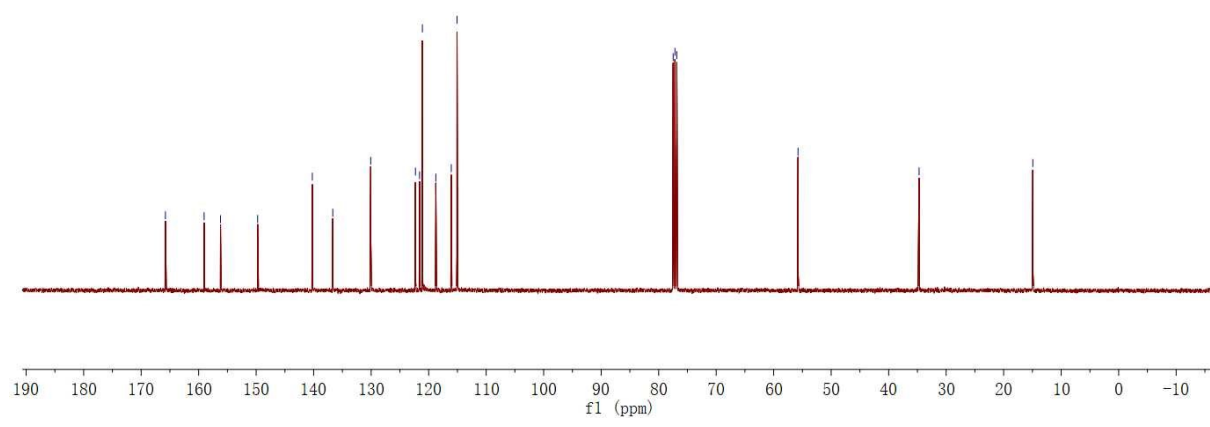

Supplement: d4cc02331e1.pdf [file d4cc02331e1.pdf]
